# Supplementary material for: On the diversity, phylogeny and biogeography of cable bacteria
Source: Front Microbiol. 2024 Nov 19;15:1485281. doi: 10.3389/fmicb.2024.1485281 (PMC11611824; doi:10.3389/fmicb.2024.1485281)
Supplement: Supplementary file 2 [file Table_2.XLSX]

## Sheet: Table S1
Supplementary Table 1
Accession numbers of reference cable bacteria and related Desulfobulbales
Accession	Species
GCA_022766165	Ca. Electrothrix gigas AU1_5
GCA_022766095	Ca. Electrothrix gigas LOE1_4_5
GCA_022766025	Ca. Electrothrix gigas AW5
GCA_022766005	Ca. Electrothrix gigas AW3_4
GCA_022765985	Ca. Electrothrix gigas AW1
GCA_022766065	Ca. Electrothrix gigas AX2
GCA_022765945	Ca. Electrothrix gigas AW2
GCA_022765875	Ca. Electrothrix gigas AUS3
GCA_022765825	Ca. Electrothrix gigas AS4_5
GCA_022765785	Ca. Electrothrix sp. AR1
GCA_022765765	AR3
GCA_022765725	AR4
GCA_022765745	Ca. Electrothrix sp. AR5
GCA_022765905	Ca. Electrothrix sp. ATG1
GCA_022765965	Ca. Electrothrix sp. ATG2
GCA_022765865	Ca. Electrothrix sp. AUS1_2
GCA_022765925	Ca. Electrothrix sp. AUS4
GCA_022766045	Ca. Electrothrix gigas AX1
GCA_022766085	Ca. Electrothrix aarhusiensis AX5
GCA_022765845	Ca. Electrothrix sp. EH2
GCA_022765805	Ca. Electrothrix sp. GM3_4
GCA_022766145	Ca. Electrothrix sp. LOE2
GCA_022766125	Ca. Electrothrix sp. MAN1_4
GCA_942493095	Ca. Electronema halotolerans
GCA_942492895	Ca. Electrothrix laxa
Ga0183576_12823	Ca. Electronema aureum isolate GS
KP728462	Ca. Electronema nielsenii isolate F1
KP728465	Ca. Electronema nielsenii isolate F5
KP728463	Ca. Electronema palustris isolate F3
KP728464	Ca. Electronema palustris isolate F4
KR912338	Ca. Electrothrix aarhusiensis isolate MCF
KR912339	Ca. Electrothrix communis isolate A1
KR912343	Ca. Electrothrix communis isolate N2
KR912344	Ca. Electrothrix communis isolate N3
KR912340	Ca. Electrothrix marina isolate A2
KR912341	Ca. Electrothrix marina isolate A3
KR912342	Ca. Electrothrix marina isolate A5
KR912345	Ca. Electrothrix communis isolate US1
KR912346	Ca. Electrothrix communis isolate US2
KR912347	Ca. Electrothrix communis isolate US4
KR912348	Ca. Electrothrix communis isolate US5
KR912349	Ca. Electrothrix japonica isolate TB
GCA_016918545	Desulfobulbus alkaliphilus DSM24258
CP003985	Desulfocapsa sulfexigens DSM10523
GCA_000025945	Desulfotalea psychrophila LSv54
AF118453	Desulforhopalus singaporensis DSM12130
GCA_900130015	Desulfofustis glycolicus DSM9705
GCA_000621145	Desulfobulbus elongatus DSM2908
NR_025150	Desulfogranum mediterraneum 86FS1
GCA_000186885	Desulfobulbus propionicus DSM2032
GCA_016919065	Desulfobulbus rhabdoformis DSM8777
GCA_016918565	Desulfogranum marinum DSM2058
GCA_000429945	Desulfogranum japonicum DSM18378
GCA_016918505	Desulforhopalus vacuolatus DSM9700
GCA_016918515	Desulfoprunum benzoelyticum DSM28570
589865	Desulfurivibrio alkaliphilus AHT2
GCA_900143695	Desulfopila aestuarii DSM18488
GCA_019703855	Desulfomarina profundi KT2
LC596831	Desulfolithobacter dissulfuricans GF1
CP021255	Desulfobulbus oralis HOT041ORNL
GCA_016446285	Desulfobulbus oligotrophicus Prop6
NR_075009	Geobacter sulfurreducens PCA

## Sheet: Table S2
Supplementary Table 2
List of 1988 identified potential cable bacteria 16S rRNA gene sequences
#	Accession/ID	Source	Site	Species-level clade	Cluster	Sequence length [bp]
1	130-3-IS-1	This study	St. 130, North Sea	Ca. Electrothrix sp. AR5	VI	1499
2	130-3-IS-10	This study	St. 130, North Sea	Ca. Electrothrix sp. AR1	VI	1495
3	130-3-IS-2	This study	St. 130, North Sea	Ca. Electrothrix communis	VI	1503
4	130-3-IS-3	This study	St. 130, North Sea	Ca. Electrothrix sp. AR5	VI	1515
5	130-3-IS-4	This study	St. 130, North Sea	Ca. Electrothrix communis	VI	1017
6	130-3-IS-5	This study	St. 130, North Sea	Ca. Electrothrix sp. AR1	VI	1017
7	130-3-IS-6	This study	St. 130, North Sea	Ca. Electrothrix sp. AR1	VI	1494
8	130-3-IS-9	This study	St. 130, North Sea	Ca. Electrothrix sp. GM3_4	VI	1492
9	130-J1-6	This study	St. 130, North Sea	Ca. Electrothrix communis	VI	1297
10	700-3-2-2	This study	St. 700, North Sea	AR4	IV	1026
11	700-3-2-5	This study	St. 700, North Sea	AR4	IV	1494
12	A8	This study	Rattekaai	Ca. Electrothrix gigas	VI	946
13	AB013265	NCBI	Nankai Trough	AB013265	V	1523
14	AB241036	SILVA	Niida River	/	/	459
15	AB241160	SILVA	Niida River	/	/	402
16	AB374690	SILVA	Iwata River, Tsu City	site1_53	I	879
17	AB782185	SILVA	Schiermonnikoog	/	/	716
18	AB782620	SILVA	Schiermonnikoog	/	/	716
19	AB806709	NCBI	Shimokita peninsula	AM745158	V	1486
20	AF354166	NCBI	Eel River Basin, CA	AF354166	V	1519
21	AF420334	NCBI	Guaymas basin	AF420334	V	1520
22	AF420335	NCBI	Guaymas basin	AF420335	V	1520
23	AJ535236	NCBI	Hydrate Ridge, Oregon	AJ535236	V	1521
24	AJ535251	NCBI	Hydrate Ridge, Oregon	AJ535236	V	1522
25	AM176869	SILVA	Futian mangrove swamp	AM176869	VI	1479
26	AM745147	NCBI	Gulf of Mexico, Green Canyon	AJ535236	V	1521
27	AM745158	NCBI	Gulf of Mexico, Green Canyon	AM745158	V	1522
28	AM745164	NCBI	Gulf of Mexico, Green Canyon	AJ535236	V	1521
29	AM745212	NCBI	Gulf of Mexico, Green Canyon	AM745212	V	1492
30	AY355305	NCBI	Rodriguez Triple Junction in the Indian Ocean	AY355305	V	1518
31	AY531563	NCBI	Rodriguez Triple Junction in the Indian Ocean	AY531563	V	1449
32	AY531586	NCBI	Rodriguez Triple Junction in the Indian Ocean	AY531586	V	1526
33	AY542555	NCBI	Gulf of Mexico (Martinez)	AJ535236	V	1370
34	B1	This study	Rattekaai	Ca. Electrothrix gigas	VI	943
35	B3	This study	Rattekaai	Ca. Electrothrix gigas	VI	947
36	B4	This study	Rattekaai	Ca. Electrothrix gigas	VI	947
37	CP130629	Literature: Plum-Jensen et al., 2024	Aarhus Bay 2	Ca. Electrothrix communis	VI	1546
38	CP138355	Literature: Hiralal et al., 2024a	Rattekaai	Ca. Electrothrix aestuarii/scaldis	VI	1546
39	CP147989	Literature: Hiralal et al., 2024b	Rattekaai	Ca. Electrothrix gigas	VI	1556
40	CP147990	Literature: Hiralal et al., 2024b	Rattekaai	Ca. Electrothrix antwerpensis	VI	1555
41	E1	This study	Rattekaai	Ca. Electrothrix antwerpensis	VI	946
42	E2	This study	Rattekaai	Ca. Electrothrix antwerpensis	VI	938
43	PQ214937 / EB2	This study	Ebro delta S=10	EB2	VI	1494
44	EB2.1-10	This study	Ebro delta S=10	EB2	VI	1218
45	EB2.1-11	This study	Ebro delta S=10	EB2	VI	1493
46	EB2.1-12	This study	Ebro delta S=10	EB2	VI	1018
47	EB2.1-4	This study	Ebro delta S=10	EB2	VI	1018
48	EB2.1-7	This study	Ebro delta S=10	EB2	VI	1021
49	EB2.1-9	This study	Ebro delta S=10	EB2	VI	1492
50	EB3.1-S2	This study	Ebro delta S=33	KF741578	VI	1217
51	EB3.3-10	This study	Ebro delta S=33	Ca. Electrothrix aestuarii/scaldis	VI	1222
52	EB3.3-11	This study	Ebro delta S=33	EB2	VI	1494
53	EB3.3-5	This study	Ebro delta S=33	Ca. Electrothrix aestuarii/scaldis	VI	1494
54	EB3.3-7	This study	Ebro delta S=33	Ca. Electrothrix aestuarii/scaldis	VI	1227
55	EF570944	SILVA	n.a.	/	/	441
56	EU334599	SILVA	Gulf of Mexico (Joye)	/	/	506
57	F1	This study	Rattekaai	Ca. Electrothrix gigas	VI	854
58	F5	This study	Rattekaai	Ca. Electrothrix gigas	VI	914
59	F8	This study	Rattekaai	Ca. Electrothrix gigas	VI	926
60	FJ264759	NCBI	Eel River Basin, CA	AJ535236	V	1524
61	FJ264778	NCBI	Eel River Basin, CA	AJ535236	V	1522
62	FJ753107	SILVA	Gulf of Fos, Mediterranean Sea	/	/	787
63	FJ753224	SILVA	Gulf of Fos, Mediterranean Sea	/	/	745
64	FJ905682	NCBI	Volcano 19, South Tonga Arc	FJ905682	V	1449
65	FM179901	NCBI	Gullfaks oil and gas fields, North Sea	FM179901	V	1424
66	FN396626	NCBI	Smeerenburgfjorden, Svalbard	FM179901	V	1438
67	FN396640	NCBI	Smeerenburgfjorden, Svalbard	FN396640	V	1415
68	FN396662	NCBI	Smeerenburgfjorden, Svalbard	FN396640	V	1428
69	FN396704	NCBI	Smeerenburgfjorden, Svalbard	AF354166	V	1439
70	FN554120	NCBI	Logatchev hydrothermal vent field, Anya's garden	FN554128	V	1521
71	FN554128	NCBI	Logatchev hydrothermal vent field, Anya's garden	FN554128	V	1520
72	FQ658831	SILVA	Chambery, AREA compon	FQ658831	I	1372
73	FQ658891	SILVA	Chambery, AREA compon	FQ658831	I	1371
74	FR798005	SILVA	Nile Deep Sea fan, pockmark area, Mediterranean Sea	/	/	586
75	FR798016	SILVA	Nile Deep Sea fan, pockmark area, Mediterranean Sea	/	/	586
76	FR798019	SILVA	Nile Deep Sea fan, pockmark area, Mediterranean Sea	/	/	586
77	FR798026	SILVA	Nile Deep Sea fan, pockmark area, Mediterranean Sea	/	/	586
78	FR798050	SILVA	Nile Deep Sea fan, pockmark area, Mediterranean Sea	/	/	586
79	FR798066	SILVA	Nile Deep Sea fan, pockmark area, Mediterranean Sea	/	/	615
80	FR798069	SILVA	Nile Deep Sea fan, pockmark area, Mediterranean Sea	/	/	615
81	FR798131	SILVA	Nile Deep Sea fan, pockmark area, Mediterranean Sea	FR798146	V	800
82	FR798146	SILVA	Nile Deep Sea fan, pockmark area, Mediterranean Sea	FR798146	V	801
83	FR798149	SILVA	Nile Deep Sea fan, pockmark area, Mediterranean Sea	/	/	628
84	FR798157	SILVA	Nile Deep Sea fan, pockmark area, Mediterranean Sea	KR814256	V	841
85	FR798159	SILVA	Nile Deep Sea fan, pockmark area, Mediterranean Sea	KR814256	V	841
86	FR798174	SILVA	Nile Deep Sea fan, pockmark area, Mediterranean Sea	KR814256	V	842
87	FR798176	SILVA	Nile Deep Sea fan, pockmark area, Mediterranean Sea	/	/	767
88	FR798182	SILVA	Nile Deep Sea fan, pockmark area, Mediterranean Sea	KR814256	V	840
89	FR798193	SILVA	Nile Deep Sea fan, pockmark area, Mediterranean Sea	KR814256	V	841
90	FR798197	SILVA	Nile Deep Sea fan, pockmark area, Mediterranean Sea	/	/	625
91	FR798200	SILVA	Nile Deep Sea fan, pockmark area, Mediterranean Sea	/	/	615
92	FR798203	SILVA	Nile Deep Sea fan, pockmark area, Mediterranean Sea	/	/	615
93	FR798362	SILVA	Nile Deep Sea fan, Amon mud volcano flank, Mediterranean Sea	/	/	606
94	FR798508	SILVA	Nile Deep Sea fan, Amon mud volcano center, Mediterranean Sea	/	/	565
95	FR798715	SILVA	Nile Deep Sea fan, Amon mud volcano center, Mediterranean Sea	/	/	522
96	FR798835	SILVA	Nile Deep Sea fan, Amon mud volcano center, Mediterranean Sea	/	/	626
97	FR798847	SILVA	Nile Deep Sea fan, Amon mud volcano center, Mediterranean Sea	/	/	626
98	FR798874	SILVA	Nile Deep Sea fan, Amon mud volcano center, Mediterranean Sea	/	/	614
99	FR798883	SILVA	Nile Deep Sea fan, Amon mud volcano center, Mediterranean Sea	/	/	614
100	FR820072	SILVA	Gulf of Finland, Baltic Sea	/	/	472
101	FR820080	SILVA	Gulf of Finland, Baltic Sea	/	/	472
102	FR820201	SILVA	Gulf of Finland, Baltic Sea	/	/	472
103	FR820264	SILVA	Gulf of Finland, Baltic Sea	/	/	472
104	FR820277	SILVA	Gulf of Finland, Baltic Sea	/	/	473
105	FR820312	SILVA	Gulf of Finland, Baltic Sea	/	/	471
106	FR852964	NCBI	Dudley site, Juan de Fuca ridge	FR852964	V	1522
107	FR875501	SILVA	Hakon Mosby mud volcano, Barents Sea	/	/	461
108	G14	This study	St. 130, North Sea	Ca. Electrothrix sp. ATG1_2	VI	911
109	G5	This study	St. 130, North Sea	Ca. Electrothrix sp. ATG1_2	VI	860
110	ga_a2_ccs1517	Literature: Sachs et al., 2022	Isar river, Garching	Ca. Electronema palustre	I	1517
111	ga_a3_ccs1516	Literature: Sachs et al., 2022	Isar river, Garching	Ca. Electronema palustre	I	1516
112	ga_a4_ccs1517	Literature: Sachs et al., 2022	Isar river, Garching	Ca. Electronema nielsenii	I	1517
113	ga_a5_ccs930	Literature: Sachs et al., 2022	Isar river, Garching	Ca. Electronema nielsenii	I	930
114	ga_a6_ccs1517	Literature: Sachs et al., 2022	Isar river, Garching	GA_A6_ccs1517	I	1517
115	ga_s4_ccs1517	Literature: Sachs et al., 2022	Isar river, Garching	Ca. Electronema palustre	I	1517
116	GCA_004284765	Literature: Thorup et al., 2021	Vennelystparken, Aarhus	Ca. Electronema aureum	I	1543
117	GCA_032595675	Literature: Plum-Jensen et al., 2024	Rattekaai	Ca. Electrothrix rattekaaiensis	VI	1546
118	GCA_032595685	Literature: Plum-Jensen et al., 2024	Rattekaai	Ca. Electrothrix aestuarii/scaldis	VI	1546
119	GCA_942491045	Literature: Sereika et al., 2023	Hou	Ca. Electrothrix aarhusiensis	VI	1546
120	GCA_942491745	Literature: Sereika et al., 2023	Hou	Ca. Electrothrix gigas	VI	1546
121	GCA_942492785	Literature: Sereika et al., 2023	Vennelystparken, Aarhus	Ca. Electronema aureum	I	1546
122	GCA_942492895	Literature: Sereika et al., 2023	Hou	Ca. Electrothrix laxa	VI	1546
123	GCA_942493095	Literature: Sereika et al., 2023	Loegten strand, Central Jutland	Ca. Electronema halotolerans	II	1546
124	GQ249497	SILVA	Bay of Cadiz	GQ249497	VI	1518
125	GQ356972	NCBI	Eel River Basin, CA	AJ535236	V	1524
126	GQ357024	NCBI	Eel River Basin, CA	AM745158	V	1525
127	GU208270	SILVA	Lake Dongping	GU208270	I	1522
128	GU215125	SILVA	Oosterschelde Bay, Zandkreek	/	/	489
129	GU302481	SILVA	Mississippi Canyon Block 118, Gulf of Mexico	KR814208	IV	1518
130	GU302491	NCBI	Mississippi Canyon Block 118, Gulf of Mexico	GU302491	V	1521
131	GU369890	NCBI	Volcano 1, South Tonga Arc	GU369890	V	1433
132	GU369922	NCBI	Volcano 1, South Tonga Arc	GU369922	V	1427
133	H1	This study	St. 130, North Sea	Ca. Electrothrix sp. ATG1_2	VI	938
134	HE972194	SILVA	Sonora Margin cold seep Vasconcelos, Guaymas Basin	HE972194	V	942
135	HG004404	Literature: Schauer et al., 2014	Aarhus Bay 1	/	/	574
136	HG004405	Literature: Schauer et al., 2014	Aarhus Bay 1	/	/	574
137	HG004406	Literature: Schauer et al., 2014	Aarhus Bay 1	/	/	574
138	HG004407	Literature: Schauer et al., 2014	Aarhus Bay 1	/	/	574
139	HG004408	Literature: Schauer et al., 2014	Aarhus Bay 1	/	/	574
140	HG004409	Literature: Schauer et al., 2014	Aarhus Bay 1	/	/	574
141	HG004410	Literature: Schauer et al., 2014	Aarhus Bay 1	/	/	574
142	HG004411	Literature: Schauer et al., 2014	Aarhus Bay 1	/	/	574
143	HG004412	Literature: Schauer et al., 2014	Aarhus Bay 1	/	/	574
144	HG004413	Literature: Schauer et al., 2014	Aarhus Bay 1	/	/	574
145	HG004414	Literature: Schauer et al., 2014	Aarhus Bay 1	/	/	574
146	HG004415	Literature: Schauer et al., 2014	Aarhus Bay 1	/	/	574
147	HG004416	Literature: Schauer et al., 2014	Aarhus Bay 1	Ca. Electrothrix communis	VI	981
148	HG004417	Literature: Schauer et al., 2014	Aarhus Bay 1	Ca. Electrothrix communis	VI	981
149	HG004418	Literature: Schauer et al., 2014	Aarhus Bay 1	Ca. Electrothrix sp. AR5	VI	981
150	HG004419	Literature: Schauer et al., 2014	Aarhus Bay 1	Ca. Electrothrix communis	VI	981
151	HG004420	Literature: Schauer et al., 2014	Aarhus Bay 1	Ca. Electrothrix communis	VI	980
152	HG004425	SILVA	Aarhus Bay 1	/	/	665
153	HG1-2-fil16	This study	Rattekaai	Ca. Electrothrix communis	VI	938
154	HG1-2-fil8	This study	Rattekaai	Ca. Electrothrix communis	VI	928
155	HQ622203	SILVA	Wadi Gaza	/	/	492
156	HQ622241	SILVA	Wadi Gaza	/	/	505
157	HQ622248	SILVA	Wadi Gaza	/	/	334
158	HQ622251	SILVA	Wadi Gaza	/	/	405
159	HQ622254	SILVA	Wadi Gaza	/	/	416
160	IO5-fil1	This study	Rattekaai	RK	VI	871
161	IO5-fil11	This study	Rattekaai	RK	VI	911
162	IO5-fil14	This study	Rattekaai	RK	VI	910
163	IO5-fil17	This study	Rattekaai	Ca. Electrothrix sp. LOE2	VI	932
164	IO5-Fil19-TM	This study	Rattekaai	Ca. Electrothrix gigas	VI	927
165	IO5-fil24	This study	Rattekaai	RK	VI	947
166	IO5-fil31	This study	Rattekaai	RK	VI	902
167	IO5-fil8	This study	Rattekaai	RK	VI	939
168	IO8-fil3	This study	Rattekaai	RK	VI	880
169	IO8-fil7	This study	Rattekaai	IO8	VI	946
170	IO8fil8	This study	Rattekaai	RK	VI	914
171	IO8-filB2	This study	Rattekaai	IO8	VI	939
172	IO8-filB4	This study	Rattekaai	IO8	VI	886
173	IO8-filB5	This study	Rattekaai	IO8	VI	939
174	IO8-filB7	This study	Rattekaai	IO8	VI	939
175	IO8-filS1a	This study	Rattekaai	RK	VI	939
176	IQ5-PL3	This study	Rattekaai	Ca. Electrothrix gigas	VI	937
177	IQ5-PL4	This study	Rattekaai	Ca. Electrothrix gigas	VI	927
178	IQ5-PL6	This study	Rattekaai	Ca. Electrothrix gigas	VI	882
179	JD3fil1	This study	Rattekaai	Ca. Electrothrix gigas	VI	927
180	JD3-fil4	This study	Rattekaai	Ca. Electrothrix gigas	VI	937
181	JD3-fil5	This study	Rattekaai	Ca. Electrothrix gigas	VI	946
182	JD4-fil3	This study	Rattekaai	Ca. Electrothrix gigas	VI	939
183	JD4-fil4	This study	Rattekaai	Ca. Electrothrix gigas	VI	893
184	JD4-fil5	This study	Rattekaai	Ca. Electrothrix gigas	VI	856
185	JD4-fil6	This study	Rattekaai	Ca. Electrothrix gigas	VI	947
186	JF10.1-3	This study	St. 130, North Sea	AR4	IV	945
187	JF10.1-8	This study	St. 130, North Sea	AR4	IV	945
188	JF268345	SILVA	Hikurangi margin, Wairarapa - Takahae	JF268345	VI	1516
189	JF268348	SILVA	Hikurangi margin, Wairarapa - Takahae	JF268345	VI	1516
190	JF268368	SILVA	Hikurangi margin, Wairarapa - Takahae	JF268345	VI	1515
191	JF268391	SILVA	Hikurangi margin, Wairarapa - Takahae	JF268391	V	1517
192	JF2-fil2	This study	St. 130, North Sea	AR4	IV	945
193	JF2-fil3	This study	St. 130, North Sea	AR4	IV	945
194	JF2-fil5	This study	St. 130, North Sea	AR4	IV	945
195	JF2-fil7	This study	St. 130, North Sea	AR4	IV	935
196	JF4-fil3	This study	St. 130, North Sea	AR4	IV	939
197	JF4-fil7	This study	St. 130, North Sea	AR4	IV	1213
198	JF4-fil9	This study	St. 130, North Sea	AR4	IV	1210
199	JF9-fil1	This study	St. 130, North Sea	AR4	IV	839
200	JF9-fil2	This study	St. 130, North Sea	AR4	IV	1277
201	JF9-fil3	This study	St. 130, North Sea	AR4	IV	935
202	JN256011	NCBI	Mud volcano, Mound 12	JN256011	V	1527
203	JN662051	NCBI	Juan de Fuca ridge	AJ535236	V	1409
204	JN662182	NCBI	Juan de Fuca ridge	JN662182	V	1395
205	JN662193	NCBI	Juan de Fuca ridge	JN662193	V	1393
206	JN662197	NCBI	Juan de Fuca ridge	JN662182	V	1438
207	JN676026	SILVA	Eastern equatorial Pacific, ODP site 1226	Ca. Electrothrix sp. GM3_4	VI	850
208	JO26-S1	This study	Rattekaai	Ca. Electrothrix gigas	VI	1502
209	PQ214938 / RK	This study	Rattekaai	RK	VI	1496
210	JO37-10	This study	Rattekaai	Ca. Electrothrix gigas	VI	1016
211	JO37-11	This study	Rattekaai	Ca. Electrothrix gigas	VI	1318
212	JO37-9	This study	Rattekaai	Ca. Electrothrix gigas	VI	1213
213	JQ241770	SILVA	Hikurangi margin, Wairarapa - Takahae	/	/	600
214	JX091025	Literature: Pfeffer et al., 2012	Aarhus Bay 1	/	/	592
215	JX091028	Literature: Pfeffer et al., 2012	Aarhus Bay 1	/	/	583
216	JX091041	Literature: Pfeffer et al., 2012	Aarhus Bay 1	/	/	580
217	JX091046	Literature: Pfeffer et al., 2012	Aarhus Bay 1	/	/	594
218	JX091048	Literature: Pfeffer et al., 2012	Aarhus Bay 1	/	/	592
219	JX091052	Literature: Pfeffer et al., 2012	Aarhus Bay 1	/	/	573
220	JX091053	Literature: Pfeffer et al., 2012	Aarhus Bay 1	/	/	573
221	JX091054	Literature: Pfeffer et al., 2012	Aarhus Bay 1	/	/	572
222	JX091056	Literature: Pfeffer et al., 2012	Aarhus Bay 1	/	/	573
223	JX091057	Literature: Pfeffer et al., 2012	Aarhus Bay 1	/	/	574
224	JX091061	Literature: Pfeffer et al., 2012	Aarhus Bay 1	/	/	592
225	JX091062	Literature: Pfeffer et al., 2012	Aarhus Bay 1	/	/	578
226	JX091064	Literature: Pfeffer et al., 2012	Aarhus Bay 1	/	/	573
227	JX091065	Literature: Pfeffer et al., 2012	Aarhus Bay 1	/	/	575
228	JX091066	Literature: Pfeffer et al., 2012	Aarhus Bay 1	/	/	592
229	JX091067	Literature: Pfeffer et al., 2012	Aarhus Bay 1	Ca. Electrothrix communis	VI	938
230	JX091070	Literature: Pfeffer et al., 2012	Aarhus Bay 1	Ca. Electrothrix communis	VI	944
231	JX091071	Literature: Pfeffer et al., 2012	Aarhus Bay 1	JX091071	VI	964
232	JX091072	Literature: Pfeffer et al., 2012	Aarhus Bay 1	JX091072	VI	889
233	JX091073	Literature: Pfeffer et al., 2012	Aarhus Bay 1	/	/	577
234	KC682614	NCBI	Tui Malila vent field, Lau Basin	KC682614	V	1518
235	KD4-2	This study	Magazzolo river, Sicily S=20	SI1	II	1492
236	KF2-5	This study	Magazzolo river, Sicily S=3	SI2	III	1233
237	PQ214939 / SI2	This study	Magazzolo river, Sicily S=3	SI2	III	1492
238	KF2-7	This study	Magazzolo river, Sicily S=3	SI1	II	1213
239	KF2-8	This study	Magazzolo river, Sicily S=3	SI2	III	1490
240	KF3-S4	This study	Magazzolo river, Sicily S=3	SI1	II	1498
241	KF3-S6	This study	Magazzolo river, Sicily S=3	SI1	II	1212
242	KF440309	NCBI	Amsterdam mud volcano, Mediterranean Sea	KF440309	V	1416
243	KF5-1	This study	Magazzolo river, Sicily S=3	SI1	II	1014
244	KF5-2	This study	Magazzolo river, Sicily S=3	SI1	II	1017
245	KF616762	NCBI	Hydrate Ridge, Oregon	AJ535236	V	1485
246	KF616777	NCBI	Hydrate Ridge, Oregon	AJ535236	V	1485
247	KF616785	NCBI	Hydrate Ridge, Oregon	AJ535236	V	1485
248	KF616796	NCBI	Hydrate Ridge, Oregon	KF616796	V	1485
249	KF623927	SILVA	Catehdral Hill hydrothermal venting site, Guaymas Basin	/	/	775
250	KF741578	SILVA	Talbert salt marsh, Huntington Beach	KF741578	VI	1516
251	KF771006	Literature: Larsen et al., 2015	Little Sippewissett salt marsh	KF771006	VI	1285
252	KF771007	Literature: Larsen et al., 2015	Little Sippewissett salt marsh	Ca. Electrothrix communis	VI	1285
253	KJ021894	Literature: Marzocchi et al., 2014	Aarhus Bay 1	/	/	636
254	KJ021895	Literature: Marzocchi et al., 2014	Aarhus Bay 1	/	/	636
255	KJ021896	Literature: Marzocchi et al., 2014	Aarhus Bay 1	/	/	636
256	KJ021897	Literature: Marzocchi et al., 2014	Aarhus Bay 1	/	/	635
257	KJ021898	Literature: Marzocchi et al., 2014	Aarhus Bay 1	/	/	636
258	KJ562733	Literature: Malkin et al., 2014	St. 130, North Sea	/	/	365
259	KJ562741	Literature: Malkin et al., 2014	St. 130, North Sea	/	/	301
260	KJ562774	Literature: Malkin et al., 2014	Lake Grevelingen	/	/	366
261	KJ562789	Literature: Malkin et al., 2014	Rattekaai	/	/	302
262	KJ562791	Literature: Malkin et al., 2014	Rattekaai	/	/	365
263	KJ562800	Literature: Malkin et al., 2014	Rattekaai	/	/	364
264	KJ562801	Literature: Malkin et al., 2014	Rattekaai	/	/	364
265	KJ562804	Literature: Malkin et al., 2014	Rattekaai	/	/	365
266	KJ562812	Literature: Malkin et al., 2014	Rattekaai	/	/	363
267	KM356302	NCBI	Hydrate Ridge, Oregon	AJ535236	V	1524
268	KM356313	NCBI	Hydrate Ridge, Oregon	KM356313	V	1481
269	KM356320	NCBI	Hydrate Ridge, Oregon	GU302491	V	1481
270	KM356323	NCBI	Hydrate Ridge, Oregon	GU302491	V	1481
271	KP265514	Literature: Vasquez-Cardenas et al., 2015	Lake Grevelingen	/	/	354
272	KP265606	Literature: Vasquez-Cardenas et al., 2015	Lake Grevelingen	/	/	354
273	KP728462	Literature: Trojan et al., 2016	Giber river	Ca. Electronema nielsenii	I	1561
274	KP728463	Literature: Trojan et al., 2016	Giber river	Ca. Electronema palustre	I	1560
275	KP728464	Literature: Trojan et al., 2016	Giber river	Ca. Electronema palustre	I	1560
276	KP728465	Literature: Trojan et al., 2016	Giber river	Ca. Electronema nielsenii	I	1561
277	KR814174	NCBI	Mud volcano, Mound 12	AJ535236	V	1524
278	KR814176	NCBI	Mud volcano, Mound 12	KR814176	V	1523
279	KR814182	NCBI	Mud volcano, Mound 12	KR814182	V	1524
280	KR814187	NCBI	Mud volcano, Mound 12	AJ535236	V	1524
281	KR814189	NCBI	Mud volcano, Mound 12	GU302491	V	1515
282	KR814194	NCBI	Mud volcano, Mound 12	GU302491	V	1520
283	KR814196	NCBI	Mud volcano, Mound 12	AJ535236	V	1524
284	KR814198	NCBI	Mud volcano, Mound 12	AJ535236	V	1524
285	KR814200	NCBI	Mud volcano, Mound 12	KR814200	V	1520
286	KR814201	NCBI	Mud volcano, Mound 12	KR814201	V	1515
287	KR814204	NCBI	Mud volcano, Mound 12	KR814182	V	1515
288	KR814208	SILVA	Mud volcano, Mound 12	KR814208	IV	1519
289	KR814212	NCBI	Mud volcano, Mound 12	GU302491	V	1513
290	KR814214	NCBI	Mud volcano, Mound 12	KR814182	V	1524
291	KR814216	NCBI	Mud volcano, Mound 12	AM745158	V	1505
292	KR814244	NCBI	Mud volcano, Mound 12	KR814176	V	1525
293	KR814247	NCBI	Mud volcano, Mound 12	KR814247	V	1519
294	KR814256	SILVA	Mud volcano, Mound 12	KR814256	V	1522
295	KR814272	NCBI	Mud volcano, Mound 12	KR814272	V	1520
296	KR814278	NCBI	Mud volcano, Mound 12	KR814201	V	1502
297	KR912338	Literature: Trojan et al., 2016	Aarhus Bay 2	Ca. Electrothrix aarhusiensis	VI	1515
298	KR912339	Literature: Trojan et al., 2016	Aarhus Bay 2	Ca. Electrothrix communis	VI	1546
299	KR912340	Literature: Trojan et al., 2016	Aarhus Bay 2	Ca. Electrothrix marina	VI	1546
300	KR912341	Literature: Trojan et al., 2016	Aarhus Bay 2	Ca. Electrothrix marina	VI	1546
301	KR912342	Literature: Trojan et al., 2016	Aarhus Bay 2	Ca. Electrothrix marina	VI	1546
302	KR912343	Literature: Trojan et al., 2016	Aarhus Bay 2	Ca. Electrothrix communis	VI	1546
303	KR912344	Literature: Trojan et al., 2016	Aarhus Bay 2	Ca. Electrothrix communis	VI	1546
304	KR912345	Literature: Trojan et al., 2016	Sippewissett salt marsh	Ca. Electrothrix communis	VI	1546
305	KR912346	Literature: Trojan et al., 2016	Sippewissett salt marsh	Ca. Electrothrix communis	VI	1546
306	KR912347	Literature: Trojan et al., 2016	Sippewissett salt marsh	Ca. Electrothrix communis	VI	1546
307	KR912348	Literature: Trojan et al., 2016	Sippewissett salt marsh	Ca. Electrothrix communis	VI	1546
308	KR912349	Literature: Trojan et al., 2016	Tokyo Bay	Ca. Electrothrix japonica	VI	1546
309	KU615959	SILVA	n.a.	/	/	512
310	KU618638	SILVA	n.a.	/	/	515
311	KU629349	SILVA	n.a.	/	/	513
312	KX097515	NCBI	Tangyin hydrothermal field, Okinawa Trough	FJ905682	V	1524
313	KX152552	SILVA	n.a.	/	/	377
314	KX172796	SILVA	Gulf of Mexico (Yang)	KX172796	VI	1448
315	KX365954	SILVA	Lake Taihu	/	/	430
316	KX366008	SILVA	Lake Taihu	/	/	430
317	KX366168	SILVA	Lake Taihu	/	/	430
318	KX366323	SILVA	Lake Taihu	/	/	430
319	KX623024	SILVA	n.a.	/	/	426
320	KX971726	SILVA	urban reservoirs and catchments, northwest Singapore Island	/	/	400
321	LC071037	SILVA	Hatsushima Island, Sagami bay	/	/	377
322	LC431992	NCBI	Chapopote, southern Gulf of Mexico	LC431992	V	1521
323	LC432073	NCBI	Chapopote, southern Gulf of Mexico	AJ535236	V	1521
324	LT174143	SILVA	Wadden Sea in Konigshafen	/	/	320
325	MF451164	SILVA	Lake Taihu	/	/	451
326	MF452109	SILVA	Lake Taihu	/	/	451
327	MF489731	SILVA	Aarhus Bay 1	/	/	392
328	MF489732	SILVA	Aarhus Bay 1	/	/	392
329	MF489733	SILVA	Aarhus Bay 1	/	/	392
330	MF489734	SILVA	Aarhus Bay 1	/	/	389
331	MF489735	SILVA	Aarhus Bay 1	/	/	387
332	MF489736	SILVA	Aarhus Bay 1	/	/	389
333	MF489737	SILVA	Aarhus Bay 1	/	/	393
334	MF489738	SILVA	Aarhus Bay 1	/	/	389
335	MF489739	SILVA	Aarhus Bay 1	/	/	393
336	MF689456	SILVA	n.a.	/	/	451
337	MG394614	SILVA	Alberta	/	/	430
338	MH252151	SILVA	n.a.	MH252182	I	1478
339	MH252152	SILVA	n.a.	MH252182	I	1478
340	MH252153	SILVA	n.a.	MH252179	I	1477
341	MH252154	SILVA	n.a.	MH252179	I	1477
342	MH252155	SILVA	n.a.	MH252179	I	1477
343	MH252156	SILVA	n.a.	MH252179	I	1477
344	MH252157	SILVA	n.a.	MH252182	I	1479
345	MH252158	SILVA	n.a.	MH252179	I	1477
346	MH252159	SILVA	n.a.	MH252182	I	1479
347	MH252161	SILVA	n.a.	MH252182	I	1479
348	MH252163	SILVA	n.a.	MH252182	I	1479
349	MH252164	SILVA	n.a.	MH252179	I	1477
350	MH252165	SILVA	n.a.	MH252166	I	1477
351	MH252166	SILVA	n.a.	MH252166	I	1477
352	MH252170	SILVA	n.a.	MH252182	I	1479
353	MH252172	SILVA	n.a.	MH252179	I	1477
354	MH252173	SILVA	n.a.	MH252179	I	1477
355	MH252174	SILVA	n.a.	MH252182	I	1479
356	MH252175	SILVA	n.a.	MH252179	I	1477
357	MH252176	SILVA	n.a.	MH252182	I	1479
358	MH252177	SILVA	n.a.	MH252182	I	1479
359	MH252178	SILVA	n.a.	MH252182	I	1479
360	MH252179	SILVA	n.a.	MH252179	I	1478
361	MH252181	SILVA	n.a.	MH252182	I	1479
362	MH252182	SILVA	n.a.	MH252182	I	1480
363	MH252183	SILVA	n.a.	MH252179	I	1477
364	MH252184	SILVA	n.a.	MH252179	I	1477
365	MH252185	SILVA	n.a.	MH252179	I	1477
366	MH252186	SILVA	n.a.	MH252179	I	1477
367	MH252188	SILVA	n.a.	MH252188	I	1477
368	MH252191	SILVA	n.a.	MH252166	I	1475
369	MH252193	SILVA	n.a.	MH252179	I	1475
370	MH252194	SILVA	n.a.	MH252179	I	1474
371	MH252196	SILVA	n.a.	MH252179	I	1475
372	MH252198	SILVA	n.a.	MH252179	I	1475
373	MH252199	SILVA	n.a.	MH252179	I	1475
374	MH356751	SILVA	Shahe river	Shahe	I	1005
375	MN947609	Literature: Xu et al., 2021	Wenyu river	Ca. Electronema nielsenii	I	1475
376	MN947610	Literature: Xu et al., 2021	Wenyu river	Ca. Electronema palustre	I	1477
377	MN947611	Literature: Xu et al., 2021	Wenyu river	MN947611	I	1477
378	MN947612	Literature: Xu et al., 2021	Wenyu river	MH252182	I	1477
379	MN947613	Literature: Xu et al., 2021	Wenyu river	MH252182	I	1476
380	MN947614	Literature: Xu et al., 2021	Wenyu river	MH252182	I	1463
381	MN947615	Literature: Xu et al., 2021	Wenyu river	MN947615	I	1477
382	MN947616	Literature: Xu et al., 2021	Wenyu river	Ca. Electronema palustre	I	1477
383	MN947617	Literature: Xu et al., 2021	Wenyu river	MH252182	I	1477
384	MN947618	Literature: Xu et al., 2021	Wenyu river	MH252182	I	1477
385	MN947619	Literature: Xu et al., 2021	Wenyu river	Ca. Electronema palustre	I	1477
386	MT640316	NCBI	n.a.	MT640316	I	1479
387	MT640317	NCBI	n.a.	MT640316	I	1479
388	MT640318	NCBI	n.a.	MT640316	I	1479
389	MT640319	NCBI	n.a.	MH252179	I	1477
390	MT640320	NCBI	n.a.	MT640316	I	1479
391	MT640321	NCBI	n.a.	MH252179	I	1477
392	MT640322	NCBI	n.a.	MH252179	I	1477
393	MT640323	NCBI	n.a.	MT640316	I	1479
394	MT640324	NCBI	n.a.	MT640316	I	1479
395	MT640325	NCBI	n.a.	MH252179	I	1477
396	MT640326	NCBI	n.a.	MH252179	I	1477
397	MT640327	NCBI	n.a.	MT640316	I	1479
398	OBAT01000332	SILVA	n.a.	Ca. Electrothrix aarhusiensis	VI	1516
399	OBAT01036080	SILVA	n.a.	Ca. Electronema nielsenii	I	1513
400	OBAT01037143	SILVA	n.a.	OBAT01037143	VI	1516
401	OBAT01038911	SILVA	n.a.	Ca. Electrothrix aarhusiensis	VI	1514
402	OBEP010009232	SILVA	Ulvedybet, Limfjorden	OBEP010114380	VI	1442
403	OBEP010013382	SILVA	Ulvedybet, Limfjorden	Ca. Electrothrix communis	VI	1245
404	OBEP010014765	SILVA	Ulvedybet, Limfjorden	OBEP010014765	VI	1231
405	OBEP010014805	SILVA	Ulvedybet, Limfjorden	Ca. Electrothrix marina	VI	1443
406	OBEP010020394	SILVA	Ulvedybet, Limfjorden	Ca. Electrothrix communis	VI	1516
407	OBEP010021551	SILVA	Ulvedybet, Limfjorden	OBEP010114380	VI	1418
408	OBEP010027357	SILVA	Ulvedybet, Limfjorden	Ca. Electrothrix communis	VI	1516
409	OBEP010031536	SILVA	Ulvedybet, Limfjorden	Ca. Electrothrix marina	VI	1449
410	OBEP010031615	SILVA	Ulvedybet, Limfjorden	Ca. Electrothrix marina	VI	1499
411	OBEP010035855	SILVA	Ulvedybet, Limfjorden	Ca. Electrothrix marina	VI	1516
412	OBEP010065858	SILVA	Ulvedybet, Limfjorden	OBEP010114380	VI	1454
413	OBEP010076780	SILVA	Ulvedybet, Limfjorden	Ca. Electrothrix marina	VI	1367
414	OBEP010083522	SILVA	Ulvedybet, Limfjorden	Ca. Electrothrix marina	VI	1339
415	OBEP010085011	SILVA	Ulvedybet, Limfjorden	Ca. Electrothrix marina	VI	1516
416	OBEP010092799	SILVA	Ulvedybet, Limfjorden	Ca. Electrothrix marina	VI	1516
417	OBEP010093245	SILVA	Ulvedybet, Limfjorden	Ca. Electrothrix communis	VI	1516
418	OBEP010094947	SILVA	Ulvedybet, Limfjorden	Ca. Electrothrix marina	VI	1505
419	OBEP010097279	SILVA	Ulvedybet, Limfjorden	OBRS01813650	VI	1442
420	OBEP010097459	SILVA	Ulvedybet, Limfjorden	Ca. Electrothrix communis	VI	1516
421	OBEP010100033	SILVA	Ulvedybet, Limfjorden	Ca. Electrothrix marina	VI	1428
422	OBEP010105976	SILVA	Ulvedybet, Limfjorden	Ca. Electrothrix marina	VI	1516
423	OBEP010109885	SILVA	Ulvedybet, Limfjorden	Ca. Electrothrix marina	VI	1404
424	OBEP010112052	SILVA	Ulvedybet, Limfjorden	Ca. Electrothrix marina	VI	1433
425	OBEP010114380	SILVA	Ulvedybet, Limfjorden	OBEP010114380	VI	1430
426	OBEP010134492	SILVA	Ulvedybet, Limfjorden	Ca. Electrothrix marina	VI	1445
427	OBEP010139360	SILVA	Ulvedybet, Limfjorden	Ca. Electrothrix marina	VI	1403
428	OBEP010140795	SILVA	Ulvedybet, Limfjorden	Ca. Electrothrix marina	VI	1368
429	OBEP010142707	SILVA	Ulvedybet, Limfjorden	Ca. Electrothrix marina	VI	1503
430	OBEP010151133	SILVA	Ulvedybet, Limfjorden	Ca. Electrothrix marina	VI	1387
431	OBEP010154291	SILVA	Ulvedybet, Limfjorden	Ca. Electrothrix marina	VI	1317
432	OBEP010156957	SILVA	Ulvedybet, Limfjorden	Ca. Electrothrix marina	VI	1451
433	OBEP010157853	SILVA	Ulvedybet, Limfjorden	Ca. Electrothrix marina	VI	1378
434	OBEP010166214	SILVA	Ulvedybet, Limfjorden	Ca. Electrothrix marina	VI	1516
435	OBEP010179088	SILVA	Ulvedybet, Limfjorden	Ca. Electrothrix marina	VI	1516
436	OBEP010186197	SILVA	Ulvedybet, Limfjorden	Ca. Electrothrix marina	VI	1446
437	OBEP010198394	SILVA	Ulvedybet, Limfjorden	Ca. Electrothrix marina	VI	1516
438	OBEP010207635	SILVA	Ulvedybet, Limfjorden	Ca. Electrothrix marina	VI	1450
439	OBEP010216775	SILVA	Ulvedybet, Limfjorden	Ca. Electrothrix marina	VI	1516
440	OBEP010221188	SILVA	Ulvedybet, Limfjorden	Ca. Electrothrix marina	VI	1437
441	OBEP010221325	SILVA	Ulvedybet, Limfjorden	Ca. Electrothrix communis	VI	1250
442	OBEP010223836	SILVA	Ulvedybet, Limfjorden	Ca. Electrothrix marina	VI	1420
443	OBEP010230648	SILVA	Ulvedybet, Limfjorden	Ca. Electrothrix communis	VI	1516
444	OBEP010236813	SILVA	Ulvedybet, Limfjorden	Ca. Electrothrix marina	VI	1334
445	OBEP010239271	SILVA	Ulvedybet, Limfjorden	Ca. Electrothrix marina	VI	1516
446	OBEP010241583	SILVA	Ulvedybet, Limfjorden	Ca. Electrothrix marina	VI	1443
447	OBEP010242625	SILVA	Ulvedybet, Limfjorden	Ca. Electrothrix marina	VI	1241
448	OBEP010248410	SILVA	Ulvedybet, Limfjorden	Ca. Electrothrix communis	VI	1514
449	OBEP010249426	SILVA	Ulvedybet, Limfjorden	Ca. Electrothrix communis	VI	1516
450	OBEP010255514	SILVA	Ulvedybet, Limfjorden	Ca. Electrothrix marina	VI	1302
451	OBEP010257633	SILVA	Ulvedybet, Limfjorden	Ca. Electrothrix communis	VI	1204
452	OBEP010665903	SILVA	Limfjorden, Aalborg	OBRS01419531	VI	1514
453	OBEP010741932	SILVA	Limfjorden, Aalborg	OBEP010114380	VI	1516
454	OBEP010745939	SILVA	Limfjorden, Aalborg	OBEP010114380	VI	1437
455	OBEP010906432	SILVA	Limfjorden, Aalborg	Ca. Electrothrix communis	VI	1474
456	OBEP011173826	SILVA	Aalborg University campus	Ca. Electronema nielsenii	I	1421
457	OBEP011174020	SILVA	Aalborg University campus	Ca. Electronema aureum	I	1417
458	OBEP011181082	SILVA	Aalborg University campus	Ca. Electronema palustre	I	1352
459	OBEP011183382	SILVA	Aalborg University campus	Ca. Electronema nielsenii	I	1328
460	OBEP011185249	SILVA	Aalborg University campus	Ca. Electronema nielsenii	I	1494
461	OBEP011189040	SILVA	Aalborg University campus	Ca. Electronema nielsenii	I	1370
462	OBEP011190598	SILVA	Aalborg University campus	Ca. Electronema aureum	I	1354
463	OBEP011191883	SILVA	Aalborg University campus	Ca. Electronema aureum	I	1315
464	OBEP011194819	SILVA	Aalborg University campus	Ca. Electronema nielsenii	I	1513
465	OBEP011194890	SILVA	Aalborg University campus	Ca. Electronema nielsenii	I	1225
466	OBEP011199077	SILVA	Aalborg University campus	Ca. Electronema nielsenii	I	1500
467	OBEP011201301	SILVA	Aalborg University campus	Ca. Electronema nielsenii	I	1425
468	OBEP011202254	SILVA	Aalborg University campus	Ca. Electronema nielsenii	I	1369
469	OBEP011215573	SILVA	Aalborg University campus	Ca. Electronema nielsenii	I	1325
470	OBEP011217759	SILVA	Dokkedal	Ca. Electrothrix aarhusiensis	VI	1516
471	OBEP011217788	SILVA	Dokkedal	Ca. Electrothrix aarhusiensis	VI	1406
472	OBEP011218079	SILVA	Dokkedal	Ca. Electrothrix aarhusiensis	VI	1516
473	OBEP011218274	SILVA	Dokkedal	Ca. Electrothrix aarhusiensis	VI	1406
474	OBEP011218619	SILVA	Dokkedal	Ca. Electrothrix aarhusiensis	VI	1516
475	OBEP011218705	SILVA	Dokkedal	Ca. Electrothrix aarhusiensis	VI	1304
476	OBEP011219038	SILVA	Dokkedal	Ca. Electrothrix aarhusiensis	VI	1392
477	OBEP011219245	SILVA	Dokkedal	Ca. Electrothrix aarhusiensis	VI	1404
478	OBEP011219870	SILVA	Dokkedal	Ca. Electrothrix aarhusiensis	VI	1516
479	OBEP011219949	SILVA	Dokkedal	Ca. Electrothrix aarhusiensis	VI	1516
480	OBEP011220049	SILVA	Dokkedal	Ca. Electrothrix aarhusiensis	VI	1227
481	OBEP011220343	SILVA	Dokkedal	Ca. Electrothrix aarhusiensis	VI	1348
482	OBEP011220659	SILVA	Dokkedal	Ca. Electrothrix aarhusiensis	VI	1516
483	OBEP011221348	SILVA	Dokkedal	Ca. Electrothrix aarhusiensis	VI	1514
484	OBEP011221415	SILVA	Dokkedal	Ca. Electrothrix sp. AR5	VI	1504
485	OBEP011221706	SILVA	Dokkedal	Ca. Electrothrix aarhusiensis	VI	1517
486	OBEP011221725	SILVA	Dokkedal	Ca. Electrothrix aarhusiensis	VI	1515
487	OBEP011222238	SILVA	Dokkedal	Ca. Electrothrix aarhusiensis	VI	1516
488	OBEP011222520	SILVA	Dokkedal	Ca. Electrothrix aarhusiensis	VI	1344
489	OBEP011222617	SILVA	Dokkedal	Ca. Electrothrix aarhusiensis	VI	1515
490	OBEP011222884	SILVA	Dokkedal	Ca. Electrothrix aarhusiensis	VI	1516
491	OBEP011223092	SILVA	Dokkedal	Ca. Electrothrix aarhusiensis	VI	1502
492	OBEP011223266	SILVA	Dokkedal	Ca. Electrothrix aarhusiensis	VI	1406
493	OBEP011223536	SILVA	Dokkedal	Ca. Electrothrix aarhusiensis	VI	1515
494	OBEP011223604	SILVA	Dokkedal	Ca. Electrothrix aarhusiensis	VI	1439
495	OBEP011223648	SILVA	Dokkedal	Ca. Electrothrix aarhusiensis	VI	1516
496	OBEP011223672	SILVA	Dokkedal	Ca. Electrothrix aarhusiensis	VI	1417
497	OBEP011223978	SILVA	Dokkedal	Ca. Electrothrix aarhusiensis	VI	1515
498	OBEP011224290	SILVA	Dokkedal	Ca. Electrothrix aarhusiensis	VI	1506
499	OBEP011224303	SILVA	Dokkedal	Ca. Electrothrix aarhusiensis	VI	1516
500	OBEP011224390	SILVA	Dokkedal	Ca. Electrothrix aarhusiensis	VI	1516
501	OBEP011224539	SILVA	Dokkedal	Ca. Electrothrix aarhusiensis	VI	1516
502	OBEP011224658	SILVA	Dokkedal	Ca. Electrothrix aarhusiensis	VI	1332
503	OBEP011224761	SILVA	Dokkedal	Ca. Electrothrix aarhusiensis	VI	1393
504	OBEP011224788	SILVA	Dokkedal	Ca. Electrothrix aarhusiensis	VI	1516
505	OBEP011225065	SILVA	Dokkedal	Ca. Electrothrix aarhusiensis	VI	1412
506	OBEP011225142	SILVA	Dokkedal	Ca. Electrothrix aarhusiensis	VI	1387
507	OBEP011225318	SILVA	Dokkedal	Ca. Electrothrix aarhusiensis	VI	1516
508	OBEP011225420	SILVA	Dokkedal	Ca. Electrothrix aarhusiensis	VI	1462
509	OBEP011225948	SILVA	Dokkedal	Ca. Electrothrix aarhusiensis	VI	1407
510	OBEP011226002	SILVA	Dokkedal	Ca. Electrothrix aarhusiensis	VI	1516
511	OBEP011226171	SILVA	Dokkedal	Ca. Electrothrix aarhusiensis	VI	1480
512	OBEP011226782	SILVA	Dokkedal	Ca. Electrothrix aarhusiensis	VI	1380
513	OBEP011227147	SILVA	Dokkedal	Ca. Electrothrix aarhusiensis	VI	1413
514	OBEP011227230	SILVA	Dokkedal	Ca. Electrothrix aarhusiensis	VI	1516
515	OBEP011227415	SILVA	Dokkedal	Ca. Electrothrix aarhusiensis	VI	1504
516	OBEP011227574	SILVA	Dokkedal	Ca. Electrothrix aarhusiensis	VI	1505
517	OBEP011227586	SILVA	Dokkedal	Ca. Electrothrix aarhusiensis	VI	1515
518	OBEP011227729	SILVA	Dokkedal	Ca. Electrothrix aarhusiensis	VI	1386
519	OBEP011227824	SILVA	Dokkedal	Ca. Electrothrix aarhusiensis	VI	1516
520	OBEP011227908	SILVA	Dokkedal	Ca. Electrothrix aarhusiensis	VI	1516
521	OBEP011227932	SILVA	Dokkedal	Ca. Electrothrix sp. AR5	VI	1412
522	OBEP011228218	SILVA	Dokkedal	Ca. Electrothrix aarhusiensis	VI	1405
523	OBEP011228332	SILVA	Dokkedal	Ca. Electrothrix aarhusiensis	VI	1404
524	OBEP011228567	SILVA	Dokkedal	Ca. Electrothrix aarhusiensis	VI	1505
525	OBEP011228640	SILVA	Dokkedal	Ca. Electrothrix aarhusiensis	VI	1398
526	OBEP011229362	SILVA	Dokkedal	Ca. Electrothrix aarhusiensis	VI	1330
527	OBEP011229756	SILVA	Dokkedal	Ca. Electrothrix aarhusiensis	VI	1516
528	OBEP011229764	SILVA	Dokkedal	Ca. Electrothrix aarhusiensis	VI	1505
529	OBEP011230008	SILVA	Dokkedal	Ca. Electrothrix aarhusiensis	VI	1411
530	OBEP011230329	SILVA	Dokkedal	Ca. Electrothrix aarhusiensis	VI	1514
531	OBEP011230565	SILVA	Dokkedal	Ca. Electrothrix aarhusiensis	VI	1404
532	OBEP011230959	SILVA	Dokkedal	Ca. Electrothrix aarhusiensis	VI	1516
533	OBEP011230987	SILVA	Dokkedal	Ca. Electrothrix aarhusiensis	VI	1515
534	OBEP011231026	SILVA	Dokkedal	Ca. Electrothrix aarhusiensis	VI	1328
535	OBEP011231035	SILVA	Dokkedal	Ca. Electrothrix aarhusiensis	VI	1516
536	OBEP011231104	SILVA	Dokkedal	Ca. Electrothrix aarhusiensis	VI	1516
537	OBEP011231604	SILVA	Dokkedal	Ca. Electrothrix aarhusiensis	VI	1514
538	OBEP011231744	SILVA	Dokkedal	Ca. Electrothrix aarhusiensis	VI	1505
539	OBEP011232018	SILVA	Dokkedal	Ca. Electrothrix aarhusiensis	VI	1516
540	OBEP011232019	SILVA	Dokkedal	Ca. Electrothrix aarhusiensis	VI	1516
541	OBEP011232058	SILVA	Dokkedal	Ca. Electrothrix aarhusiensis	VI	1516
542	OBEP011232556	SILVA	Dokkedal	Ca. Electrothrix aarhusiensis	VI	1514
543	OBEP011232598	SILVA	Dokkedal	Ca. Electrothrix aarhusiensis	VI	1515
544	OBEP011232649	SILVA	Dokkedal	Ca. Electrothrix aarhusiensis	VI	1405
545	OBEP011232888	SILVA	Dokkedal	Ca. Electrothrix communis	VI	1515
546	OBEP011232955	SILVA	Dokkedal	Ca. Electrothrix aarhusiensis	VI	1516
547	OBEP011233244	SILVA	Dokkedal	Ca. Electrothrix aarhusiensis	VI	1516
548	OBEP011233275	SILVA	Dokkedal	Ca. Electrothrix aarhusiensis	VI	1487
549	OBEP011233461	SILVA	Dokkedal	Ca. Electrothrix aarhusiensis	VI	1404
550	OBEP011233602	SILVA	Dokkedal	Ca. Electrothrix aarhusiensis	VI	1505
551	OBEP011233855	SILVA	Dokkedal	Ca. Electrothrix aarhusiensis	VI	1516
552	OBEP011233987	SILVA	Dokkedal	Ca. Electrothrix aarhusiensis	VI	1404
553	OBEP011234233	SILVA	Dokkedal	Ca. Electrothrix aarhusiensis	VI	1412
554	OBEP011234530	SILVA	Dokkedal	Ca. Electrothrix aarhusiensis	VI	1516
555	OBEP011234629	SILVA	Dokkedal	Ca. Electrothrix aarhusiensis	VI	1515
556	OBEP011234657	SILVA	Dokkedal	Ca. Electrothrix aarhusiensis	VI	1409
557	OBEP011234676	SILVA	Dokkedal	Ca. Electrothrix aarhusiensis	VI	1421
558	OBEP011234728	SILVA	Dokkedal	Ca. Electrothrix aarhusiensis	VI	1516
559	OBEP011235039	SILVA	Dokkedal	Ca. Electrothrix aarhusiensis	VI	1406
560	OBEP011235124	SILVA	Dokkedal	Ca. Electrothrix aarhusiensis	VI	1516
561	OBEP011235202	SILVA	Dokkedal	Ca. Electrothrix aarhusiensis	VI	1358
562	OBEP011235266	SILVA	Dokkedal	Ca. Electrothrix aarhusiensis	VI	1516
563	OBEP011235633	SILVA	Dokkedal	Ca. Electrothrix aarhusiensis	VI	1516
564	OBEP011235803	SILVA	Dokkedal	Ca. Electrothrix aarhusiensis	VI	1515
565	OBEP011236638	SILVA	Dokkedal	Ca. Electrothrix aarhusiensis	VI	1434
566	OBEP011237100	SILVA	Dokkedal	Ca. Electrothrix aarhusiensis	VI	1504
567	OBEP011237149	SILVA	Dokkedal	OBEP011364101	VI	1515
568	OBEP011237178	SILVA	Dokkedal	Ca. Electrothrix aarhusiensis	VI	1484
569	OBEP011237290	SILVA	Dokkedal	Ca. Electrothrix aarhusiensis	VI	1516
570	OBEP011237529	SILVA	Dokkedal	Ca. Electrothrix aarhusiensis	VI	1514
571	OBEP011237693	SILVA	Dokkedal	Ca. Electrothrix aarhusiensis	VI	1515
572	OBEP011238314	SILVA	Dokkedal	Ca. Electrothrix aarhusiensis	VI	1512
573	OBEP011238545	SILVA	Dokkedal	Ca. Electrothrix aarhusiensis	VI	1421
574	OBEP011238756	SILVA	Dokkedal	Ca. Electrothrix aarhusiensis	VI	1344
575	OBEP011238851	SILVA	Dokkedal	Ca. Electrothrix aarhusiensis	VI	1516
576	OBEP011238985	SILVA	Dokkedal	Ca. Electrothrix aarhusiensis	VI	1405
577	OBEP011239017	SILVA	Dokkedal	Ca. Electrothrix aarhusiensis	VI	1515
578	OBEP011239326	SILVA	Dokkedal	Ca. Electrothrix aarhusiensis	VI	1387
579	OBEP011240102	SILVA	Dokkedal	Ca. Electrothrix aarhusiensis	VI	1516
580	OBEP011240261	SILVA	Dokkedal	Ca. Electrothrix aarhusiensis	VI	1422
581	OBEP011240990	SILVA	Dokkedal	OBEP010114380	VI	1507
582	OBEP011240998	SILVA	Dokkedal	Ca. Electrothrix aarhusiensis	VI	1457
583	OBEP011241081	SILVA	Dokkedal	Ca. Electrothrix aarhusiensis	VI	1516
584	OBEP011241219	SILVA	Dokkedal	Ca. Electrothrix aarhusiensis	VI	1505
585	OBEP011241276	SILVA	Dokkedal	Ca. Electrothrix aarhusiensis	VI	1488
586	OBEP011241281	SILVA	Dokkedal	Ca. Electrothrix aarhusiensis	VI	1404
587	OBEP011241389	SILVA	Dokkedal	Ca. Electrothrix aarhusiensis	VI	1516
588	OBEP011241794	SILVA	Dokkedal	Ca. Electrothrix aarhusiensis	VI	1453
589	OBEP011241851	SILVA	Dokkedal	Ca. Electrothrix aarhusiensis	VI	1457
590	OBEP011241954	SILVA	Dokkedal	Ca. Electrothrix aarhusiensis	VI	1506
591	OBEP011241992	SILVA	Dokkedal	Ca. Electrothrix aarhusiensis	VI	1515
592	OBEP011242086	SILVA	Dokkedal	Ca. Electrothrix aarhusiensis	VI	1516
593	OBEP011242399	SILVA	Dokkedal	Ca. Electrothrix aarhusiensis	VI	1516
594	OBEP011242583	SILVA	Dokkedal	Ca. Electrothrix aarhusiensis	VI	1498
595	OBEP011242781	SILVA	Dokkedal	Ca. Electrothrix aarhusiensis	VI	1492
596	OBEP011242805	SILVA	Dokkedal	Ca. Electrothrix aarhusiensis	VI	1516
597	OBEP011242965	SILVA	Dokkedal	Ca. Electrothrix aarhusiensis	VI	1516
598	OBEP011243114	SILVA	Dokkedal	Ca. Electrothrix aarhusiensis	VI	1507
599	OBEP011243995	SILVA	Dokkedal	Ca. Electrothrix aarhusiensis	VI	1516
600	OBEP011244065	SILVA	Dokkedal	Ca. Electrothrix aarhusiensis	VI	1516
601	OBEP011244134	SILVA	Dokkedal	Ca. Electrothrix aarhusiensis	VI	1412
602	OBEP011244509	SILVA	Dokkedal	Ca. Electrothrix aarhusiensis	VI	1210
603	OBEP011244809	SILVA	Dokkedal	Ca. Electrothrix aarhusiensis	VI	1515
604	OBEP011245132	SILVA	Dokkedal	Ca. Electrothrix aarhusiensis	VI	1516
605	OBEP011245645	SILVA	Dokkedal	Ca. Electrothrix aarhusiensis	VI	1506
606	OBEP011246616	SILVA	Dokkedal	Ca. Electrothrix aarhusiensis	VI	1407
607	OBEP011246790	SILVA	Dokkedal	Ca. Electrothrix aarhusiensis	VI	1429
608	OBEP011246973	SILVA	Dokkedal	Ca. Electrothrix aarhusiensis	VI	1516
609	OBEP011247143	SILVA	Dokkedal	Ca. Electrothrix aarhusiensis	VI	1404
610	OBEP011247424	SILVA	Dokkedal	Ca. Electrothrix communis	VI	1214
611	OBEP011247591	SILVA	Dokkedal	Ca. Electrothrix aarhusiensis	VI	1516
612	OBEP011247731	SILVA	Dokkedal	Ca. Electrothrix aarhusiensis	VI	1516
613	OBEP011247772	SILVA	Dokkedal	Ca. Electrothrix aarhusiensis	VI	1516
614	OBEP011248061	SILVA	Dokkedal	Ca. Electrothrix aarhusiensis	VI	1426
615	OBEP011248193	SILVA	Dokkedal	Ca. Electrothrix aarhusiensis	VI	1516
616	OBEP011248504	SILVA	Dokkedal	Ca. Electrothrix aarhusiensis	VI	1273
617	OBEP011248547	SILVA	Dokkedal	Ca. Electrothrix aarhusiensis	VI	1516
618	OBEP011248678	SILVA	Dokkedal	Ca. Electrothrix aarhusiensis	VI	1516
619	OBEP011249090	SILVA	Dokkedal	Ca. Electrothrix aarhusiensis	VI	1404
620	OBEP011249277	SILVA	Dokkedal	Ca. Electrothrix aarhusiensis	VI	1513
621	OBEP011249453	SILVA	Dokkedal	Ca. Electrothrix aarhusiensis	VI	1389
622	OBEP011249601	SILVA	Dokkedal	Ca. Electrothrix aarhusiensis	VI	1516
623	OBEP011249774	SILVA	Dokkedal	Ca. Electrothrix aarhusiensis	VI	1515
624	OBEP011249907	SILVA	Dokkedal	Ca. Electrothrix aarhusiensis	VI	1504
625	OBEP011250094	SILVA	Dokkedal	Ca. Electrothrix aarhusiensis	VI	1514
626	OBEP011250109	SILVA	Dokkedal	Ca. Electrothrix aarhusiensis	VI	1516
627	OBEP011250501	SILVA	Dokkedal	Ca. Electrothrix aarhusiensis	VI	1352
628	OBEP011250739	SILVA	Dokkedal	Ca. Electrothrix aarhusiensis	VI	1393
629	OBEP011250795	SILVA	Dokkedal	Ca. Electrothrix aarhusiensis	VI	1516
630	OBEP011251016	SILVA	Dokkedal	Ca. Electrothrix aarhusiensis	VI	1266
631	OBEP011251424	SILVA	Dokkedal	Ca. Electrothrix aarhusiensis	VI	1515
632	OBEP011251491	SILVA	Dokkedal	Ca. Electrothrix aarhusiensis	VI	1405
633	OBEP011251684	SILVA	Dokkedal	Ca. Electrothrix aarhusiensis	VI	1407
634	OBEP011251816	SILVA	Dokkedal	Ca. Electrothrix aarhusiensis	VI	1404
635	OBEP011251896	SILVA	Dokkedal	Ca. Electrothrix aarhusiensis	VI	1516
636	OBEP011252286	SILVA	Dokkedal	Ca. Electrothrix aarhusiensis	VI	1515
637	OBEP011252702	SILVA	Dokkedal	Ca. Electrothrix aarhusiensis	VI	1276
638	OBEP011253186	SILVA	Dokkedal	Ca. Electrothrix aarhusiensis	VI	1406
639	OBEP011253338	SILVA	Dokkedal	Ca. Electrothrix aarhusiensis	VI	1516
640	OBEP011254044	SILVA	Dokkedal	Ca. Electrothrix aarhusiensis	VI	1515
641	OBEP011254061	SILVA	Dokkedal	Ca. Electrothrix communis	VI	1416
642	OBEP011254162	SILVA	Dokkedal	Ca. Electrothrix aarhusiensis	VI	1516
643	OBEP011254218	SILVA	Dokkedal	Ca. Electrothrix aarhusiensis	VI	1409
644	OBEP011254742	SILVA	Dokkedal	Ca. Electrothrix aarhusiensis	VI	1516
645	OBEP011254979	SILVA	Dokkedal	Ca. Electrothrix aarhusiensis	VI	1336
646	OBEP011255284	SILVA	Dokkedal	Ca. Electrothrix aarhusiensis	VI	1393
647	OBEP011255330	SILVA	Dokkedal	Ca. Electrothrix aarhusiensis	VI	1516
648	OBEP011255468	SILVA	Dokkedal	Ca. Electrothrix aarhusiensis	VI	1406
649	OBEP011255627	SILVA	Dokkedal	Ca. Electrothrix aarhusiensis	VI	1516
650	OBEP011255695	SILVA	Dokkedal	Ca. Electrothrix aarhusiensis	VI	1505
651	OBEP011255980	SILVA	Dokkedal	Ca. Electrothrix aarhusiensis	VI	1516
652	OBEP011256120	SILVA	Dokkedal	Ca. Electrothrix aarhusiensis	VI	1414
653	OBEP011256247	SILVA	Dokkedal	Ca. Electrothrix aarhusiensis	VI	1493
654	OBEP011256615	SILVA	Dokkedal	Ca. Electrothrix aarhusiensis	VI	1465
655	OBEP011256837	SILVA	Dokkedal	Ca. Electrothrix aarhusiensis	VI	1515
656	OBEP011256901	SILVA	Dokkedal	Ca. Electrothrix aarhusiensis	VI	1406
657	OBEP011256929	SILVA	Dokkedal	Ca. Electrothrix aarhusiensis	VI	1516
658	OBEP011257114	SILVA	Dokkedal	Ca. Electrothrix aarhusiensis	VI	1412
659	OBEP011257766	SILVA	Dokkedal	Ca. Electrothrix aarhusiensis	VI	1516
660	OBEP011257811	SILVA	Dokkedal	Ca. Electrothrix aarhusiensis	VI	1515
661	OBEP011257899	SILVA	Dokkedal	Ca. Electrothrix aarhusiensis	VI	1516
662	OBEP011258168	SILVA	Dokkedal	Ca. Electrothrix aarhusiensis	VI	1453
663	OBEP011259174	SILVA	Dokkedal	Ca. Electrothrix aarhusiensis	VI	1506
664	OBEP011259220	SILVA	Dokkedal	Ca. Electrothrix aarhusiensis	VI	1274
665	OBEP011259602	SILVA	Dokkedal	Ca. Electrothrix aarhusiensis	VI	1505
666	OBEP011259841	SILVA	Dokkedal	Ca. Electrothrix aarhusiensis	VI	1505
667	OBEP011260265	SILVA	Dokkedal	Ca. Electrothrix aarhusiensis	VI	1431
668	OBEP011260337	SILVA	Dokkedal	Ca. Electrothrix aarhusiensis	VI	1411
669	OBEP011260377	SILVA	Dokkedal	Ca. Electrothrix aarhusiensis	VI	1515
670	OBEP011260562	SILVA	Dokkedal	Ca. Electrothrix aarhusiensis	VI	1505
671	OBEP011260585	SILVA	Dokkedal	Ca. Electrothrix aarhusiensis	VI	1360
672	OBEP011260611	SILVA	Dokkedal	Ca. Electrothrix aarhusiensis	VI	1516
673	OBEP011260678	SILVA	Dokkedal	Ca. Electrothrix aarhusiensis	VI	1406
674	OBEP011260798	SILVA	Dokkedal	Ca. Electrothrix aarhusiensis	VI	1489
675	OBEP011260847	SILVA	Dokkedal	Ca. Electrothrix aarhusiensis	VI	1516
676	OBEP011260896	SILVA	Dokkedal	Ca. Electrothrix aarhusiensis	VI	1516
677	OBEP011260905	SILVA	Dokkedal	Ca. Electrothrix aarhusiensis	VI	1506
678	OBEP011261312	SILVA	Dokkedal	Ca. Electrothrix aarhusiensis	VI	1505
679	OBEP011261818	SILVA	Dokkedal	Ca. Electrothrix aarhusiensis	VI	1515
680	OBEP011261833	SILVA	Dokkedal	Ca. Electrothrix aarhusiensis	VI	1516
681	OBEP011261899	SILVA	Dokkedal	Ca. Electrothrix aarhusiensis	VI	1514
682	OBEP011262103	SILVA	Dokkedal	Ca. Electrothrix aarhusiensis	VI	1506
683	OBEP011262111	SILVA	Dokkedal	Ca. Electrothrix aarhusiensis	VI	1506
684	OBEP011262198	SILVA	Dokkedal	Ca. Electrothrix aarhusiensis	VI	1505
685	OBEP011262419	SILVA	Dokkedal	Ca. Electrothrix aarhusiensis	VI	1448
686	OBEP011262434	SILVA	Dokkedal	Ca. Electrothrix aarhusiensis	VI	1505
687	OBEP011262465	SILVA	Dokkedal	Ca. Electrothrix aarhusiensis	VI	1514
688	OBEP011262485	SILVA	Dokkedal	Ca. Electrothrix aarhusiensis	VI	1279
689	OBEP011262517	SILVA	Dokkedal	Ca. Electrothrix sp. AR5	VI	1503
690	OBEP011262667	SILVA	Dokkedal	Ca. Electrothrix aarhusiensis	VI	1516
691	OBEP011262801	SILVA	Dokkedal	Ca. Electrothrix aarhusiensis	VI	1374
692	OBEP011263015	SILVA	Dokkedal	Ca. Electrothrix aarhusiensis	VI	1516
693	OBEP011263160	SILVA	Dokkedal	Ca. Electrothrix aarhusiensis	VI	1516
694	OBEP011263251	SILVA	Dokkedal	Ca. Electrothrix aarhusiensis	VI	1501
695	OBEP011263330	SILVA	Dokkedal	Ca. Electrothrix aarhusiensis	VI	1419
696	OBEP011263910	SILVA	Dokkedal	Ca. Electrothrix aarhusiensis	VI	1505
697	OBEP011264091	SILVA	Dokkedal	Ca. Electrothrix aarhusiensis	VI	1332
698	OBEP011264600	SILVA	Dokkedal	Ca. Electrothrix aarhusiensis	VI	1499
699	OBEP011264806	SILVA	Dokkedal	Ca. Electrothrix aarhusiensis	VI	1515
700	OBEP011264871	SILVA	Dokkedal	Ca. Electrothrix aarhusiensis	VI	1508
701	OBEP011264905	SILVA	Dokkedal	Ca. Electrothrix aarhusiensis	VI	1406
702	OBEP011264990	SILVA	Dokkedal	Ca. Electrothrix aarhusiensis	VI	1453
703	OBEP011265040	SILVA	Dokkedal	Ca. Electrothrix aarhusiensis	VI	1505
704	OBEP011265119	SILVA	Dokkedal	Ca. Electrothrix aarhusiensis	VI	1516
705	OBEP011265126	SILVA	Dokkedal	Ca. Electrothrix aarhusiensis	VI	1516
706	OBEP011265225	SILVA	Dokkedal	Ca. Electrothrix aarhusiensis	VI	1405
707	OBEP011265355	SILVA	Dokkedal	Ca. Electrothrix aarhusiensis	VI	1516
708	OBEP011265392	SILVA	Dokkedal	Ca. Electrothrix aarhusiensis	VI	1516
709	OBEP011265601	SILVA	Dokkedal	Ca. Electrothrix aarhusiensis	VI	1504
710	OBEP011266043	SILVA	Dokkedal	Ca. Electrothrix aarhusiensis	VI	1366
711	OBEP011266195	SILVA	Dokkedal	Ca. Electrothrix aarhusiensis	VI	1506
712	OBEP011266198	SILVA	Dokkedal	Ca. Electrothrix aarhusiensis	VI	1516
713	OBEP011266339	SILVA	Dokkedal	Ca. Electrothrix aarhusiensis	VI	1516
714	OBEP011266482	SILVA	Dokkedal	Ca. Electrothrix aarhusiensis	VI	1516
715	OBEP011266700	SILVA	Dokkedal	Ca. Electrothrix aarhusiensis	VI	1416
716	OBEP011266741	SILVA	Dokkedal	Ca. Electrothrix sp. AR5	VI	1443
717	OBEP011266823	SILVA	Dokkedal	Ca. Electrothrix aarhusiensis	VI	1505
718	OBEP011266876	SILVA	Dokkedal	Ca. Electrothrix aarhusiensis	VI	1331
719	OBEP011267435	SILVA	Dokkedal	Ca. Electrothrix aarhusiensis	VI	1443
720	OBEP011267525	SILVA	Dokkedal	Ca. Electrothrix aarhusiensis	VI	1491
721	OBEP011267538	SILVA	Dokkedal	Ca. Electrothrix aarhusiensis	VI	1421
722	OBEP011267850	SILVA	Dokkedal	Ca. Electrothrix aarhusiensis	VI	1516
723	OBEP011268054	SILVA	Dokkedal	Ca. Electrothrix aarhusiensis	VI	1503
724	OBEP011268596	SILVA	Dokkedal	Ca. Electrothrix aarhusiensis	VI	1516
725	OBEP011269478	SILVA	Dokkedal	Ca. Electrothrix aarhusiensis	VI	1516
726	OBEP011269740	SILVA	Dokkedal	Ca. Electrothrix aarhusiensis	VI	1507
727	OBEP011269809	SILVA	Dokkedal	Ca. Electrothrix aarhusiensis	VI	1503
728	OBEP011269930	SILVA	Dokkedal	Ca. Electrothrix aarhusiensis	VI	1516
729	OBEP011270422	SILVA	Dokkedal	Ca. Electrothrix aarhusiensis	VI	1515
730	OBEP011270500	SILVA	Dokkedal	Ca. Electrothrix aarhusiensis	VI	1516
731	OBEP011270653	SILVA	Dokkedal	Ca. Electrothrix aarhusiensis	VI	1474
732	OBEP011271049	SILVA	Dokkedal	Ca. Electrothrix aarhusiensis	VI	1513
733	OBEP011271504	SILVA	Dokkedal	Ca. Electrothrix aarhusiensis	VI	1485
734	OBEP011272325	SILVA	Dokkedal	Ca. Electrothrix aarhusiensis	VI	1505
735	OBEP011272334	SILVA	Dokkedal	Ca. Electrothrix aarhusiensis	VI	1516
736	OBEP011272357	SILVA	Dokkedal	Ca. Electrothrix aarhusiensis	VI	1515
737	OBEP011272428	SILVA	Dokkedal	Ca. Electrothrix aarhusiensis	VI	1515
738	OBEP011272770	SILVA	Dokkedal	Ca. Electrothrix aarhusiensis	VI	1516
739	OBEP011273165	SILVA	Dokkedal	Ca. Electrothrix aarhusiensis	VI	1516
740	OBEP011273327	SILVA	Dokkedal	Ca. Electrothrix aarhusiensis	VI	1514
741	OBEP011274185	SILVA	Dokkedal	Ca. Electrothrix sp. AR5	VI	1515
742	OBEP011274232	SILVA	Dokkedal	Ca. Electrothrix aarhusiensis	VI	1515
743	OBEP011274515	SILVA	Dokkedal	Ca. Electrothrix aarhusiensis	VI	1516
744	OBEP011274798	SILVA	Dokkedal	Ca. Electrothrix aarhusiensis	VI	1516
745	OBEP011274804	SILVA	Dokkedal	Ca. Electrothrix aarhusiensis	VI	1368
746	OBEP011274942	SILVA	Dokkedal	Ca. Electrothrix aarhusiensis	VI	1288
747	OBEP011275037	SILVA	Dokkedal	Ca. Electrothrix aarhusiensis	VI	1516
748	OBEP011275235	SILVA	Dokkedal	Ca. Electrothrix aarhusiensis	VI	1516
749	OBEP011275534	SILVA	Mariagerfjord	Ca. Electrothrix aarhusiensis	VI	1505
750	OBEP011276038	SILVA	Mariagerfjord	Ca. Electrothrix aarhusiensis	VI	1453
751	OBEP011276457	SILVA	Mariagerfjord	Ca. Electrothrix aarhusiensis	VI	1505
752	OBEP011276497	SILVA	Mariagerfjord	Ca. Electrothrix aarhusiensis	VI	1505
753	OBEP011277008	SILVA	Mariagerfjord	Ca. Electrothrix aarhusiensis	VI	1516
754	OBEP011277027	SILVA	Mariagerfjord	Ca. Electrothrix aarhusiensis	VI	1516
755	OBEP011277239	SILVA	Mariagerfjord	Ca. Electrothrix aarhusiensis	VI	1514
756	OBEP011277402	SILVA	Mariagerfjord	Ca. Electrothrix aarhusiensis	VI	1505
757	OBEP011277753	SILVA	Mariagerfjord	Ca. Electrothrix communis	VI	1503
758	OBEP011278097	SILVA	Mariagerfjord	Ca. Electrothrix aarhusiensis	VI	1503
759	OBEP011278984	SILVA	Mariagerfjord	Ca. Electrothrix aarhusiensis	VI	1504
760	OBEP011279165	SILVA	Mariagerfjord	Ca. Electrothrix communis	VI	1506
761	OBEP011279214	SILVA	Mariagerfjord	Ca. Electrothrix aarhusiensis	VI	1504
762	OBEP011279438	SILVA	Mariagerfjord	Ca. Electrothrix aarhusiensis	VI	1516
763	OBEP011279527	SILVA	Mariagerfjord	Ca. Electrothrix aarhusiensis	VI	1406
764	OBEP011279898	SILVA	Mariagerfjord	Ca. Electrothrix aarhusiensis	VI	1402
765	OBEP011279978	SILVA	Mariagerfjord	Ca. Electrothrix aarhusiensis	VI	1493
766	OBEP011280024	SILVA	Mariagerfjord	Ca. Electrothrix aarhusiensis	VI	1422
767	OBEP011280068	SILVA	Mariagerfjord	Ca. Electrothrix aarhusiensis	VI	1505
768	OBEP011280104	SILVA	Mariagerfjord	Ca. Electrothrix aarhusiensis	VI	1505
769	OBEP011280280	SILVA	Mariagerfjord	Ca. Electrothrix aarhusiensis	VI	1403
770	OBEP011280530	SILVA	Mariagerfjord	Ca. Electrothrix communis	VI	1393
771	OBEP011280613	SILVA	Mariagerfjord	Ca. Electrothrix aarhusiensis	VI	1504
772	OBEP011280670	SILVA	Mariagerfjord	Ca. Electrothrix aarhusiensis	VI	1513
773	OBEP011280952	SILVA	Mariagerfjord	Ca. Electrothrix communis	VI	1398
774	OBEP011281124	SILVA	Mariagerfjord	Ca. Electrothrix aarhusiensis	VI	1505
775	OBEP011281388	SILVA	Mariagerfjord	Ca. Electrothrix aarhusiensis	VI	1415
776	OBEP011281540	SILVA	Mariagerfjord	Ca. Electrothrix communis	VI	1355
777	OBEP011281836	SILVA	Mariagerfjord	Ca. Electrothrix aarhusiensis	VI	1411
778	OBEP011282027	SILVA	Mariagerfjord	Ca. Electrothrix aarhusiensis	VI	1516
779	OBEP011282365	SILVA	Mariagerfjord	Ca. Electrothrix aarhusiensis	VI	1407
780	OBEP011282428	SILVA	Mariagerfjord	Ca. Electrothrix aarhusiensis	VI	1395
781	OBEP011282751	SILVA	Mariagerfjord	Ca. Electrothrix aarhusiensis	VI	1403
782	OBEP011282785	SILVA	Mariagerfjord	Ca. Electrothrix aarhusiensis	VI	1504
783	OBEP011283004	SILVA	Mariagerfjord	Ca. Electrothrix aarhusiensis	VI	1505
784	OBEP011283058	SILVA	Mariagerfjord	Ca. Electrothrix aarhusiensis	VI	1425
785	OBEP011283077	SILVA	Mariagerfjord	Ca. Electrothrix aarhusiensis	VI	1503
786	OBEP011283117	SILVA	Mariagerfjord	Ca. Electrothrix aarhusiensis	VI	1502
787	OBEP011283408	SILVA	Mariagerfjord	Ca. Electrothrix aarhusiensis	VI	1404
788	OBEP011283452	SILVA	Mariagerfjord	Ca. Electrothrix aarhusiensis	VI	1210
789	OBEP011283625	SILVA	Mariagerfjord	Ca. Electrothrix aarhusiensis	VI	1406
790	OBEP011284495	SILVA	Mariagerfjord	Ca. Electrothrix aarhusiensis	VI	1505
791	OBEP011284502	SILVA	Mariagerfjord	OBEP011284502	VI	1515
792	OBEP011284591	SILVA	Mariagerfjord	Ca. Electrothrix aarhusiensis	VI	1504
793	OBEP011284993	SILVA	Mariagerfjord	Ca. Electrothrix aarhusiensis	VI	1410
794	OBEP011285247	SILVA	Mariagerfjord	Ca. Electrothrix aarhusiensis	VI	1503
795	OBEP011285617	SILVA	Mariagerfjord	Ca. Electrothrix aarhusiensis	VI	1506
796	OBEP011285844	SILVA	Mariagerfjord	Ca. Electrothrix aarhusiensis	VI	1514
797	OBEP011286123	SILVA	Mariagerfjord	Ca. Electrothrix aarhusiensis	VI	1428
798	OBEP011286184	SILVA	Mariagerfjord	Ca. Electrothrix aarhusiensis	VI	1516
799	OBEP011286442	SILVA	Mariagerfjord	Ca. Electrothrix sp. AR5	VI	1514
800	OBEP011286912	SILVA	Mariagerfjord	Ca. Electrothrix aarhusiensis	VI	1516
801	OBEP011287160	SILVA	Mariagerfjord	Ca. Electrothrix aarhusiensis	VI	1411
802	OBEP011287433	SILVA	Mariagerfjord	Ca. Electrothrix aarhusiensis	VI	1410
803	OBEP011287622	SILVA	Mariagerfjord	Ca. Electrothrix aarhusiensis	VI	1505
804	OBEP011287799	SILVA	Mariagerfjord	Ca. Electrothrix aarhusiensis	VI	1515
805	OBEP011289056	SILVA	Mariagerfjord	Ca. Electrothrix aarhusiensis	VI	1508
806	OBEP011289230	SILVA	Mariagerfjord	Ca. Electrothrix aarhusiensis	VI	1405
807	OBEP011289338	SILVA	Mariagerfjord	Ca. Electrothrix aarhusiensis	VI	1489
808	OBEP011289735	SILVA	Mariagerfjord	Ca. Electrothrix communis	VI	1383
809	OBEP011290063	SILVA	Mariagerfjord	Ca. Electrothrix aarhusiensis	VI	1406
810	OBEP011290450	SILVA	Mariagerfjord	Ca. Electrothrix aarhusiensis	VI	1503
811	OBEP011290592	SILVA	Mariagerfjord	Ca. Electrothrix aarhusiensis	VI	1504
812	OBEP011290594	SILVA	Mariagerfjord	Ca. Electrothrix aarhusiensis	VI	1516
813	OBEP011290761	SILVA	Mariagerfjord	Ca. Electrothrix aarhusiensis	VI	1516
814	OBEP011290766	SILVA	Mariagerfjord	Ca. Electrothrix aarhusiensis	VI	1514
815	OBEP011290799	SILVA	Mariagerfjord	Ca. Electrothrix aarhusiensis	VI	1412
816	OBEP011290953	SILVA	Mariagerfjord	Ca. Electrothrix aarhusiensis	VI	1505
817	OBEP011291055	SILVA	Mariagerfjord	Ca. Electrothrix aarhusiensis	VI	1505
818	OBEP011291078	SILVA	Mariagerfjord	Ca. Electrothrix aarhusiensis	VI	1505
819	OBEP011291177	SILVA	Mariagerfjord	Ca. Electrothrix aarhusiensis	VI	1506
820	OBEP011291181	SILVA	Mariagerfjord	Ca. Electrothrix aarhusiensis	VI	1505
821	OBEP011291413	SILVA	Mariagerfjord	Ca. Electrothrix aarhusiensis	VI	1403
822	OBEP011291465	SILVA	Mariagerfjord	Ca. Electrothrix aarhusiensis	VI	1304
823	OBEP011291476	SILVA	Mariagerfjord	Ca. Electrothrix aarhusiensis	VI	1406
824	OBEP011291688	SILVA	Mariagerfjord	Ca. Electrothrix aarhusiensis	VI	1406
825	OBEP011292234	SILVA	Mariagerfjord	Ca. Electrothrix communis	VI	1514
826	OBEP011292245	SILVA	Mariagerfjord	Ca. Electrothrix aarhusiensis	VI	1515
827	OBEP011292295	SILVA	Mariagerfjord	Ca. Electrothrix aarhusiensis	VI	1516
828	OBEP011292703	SILVA	Mariagerfjord	Ca. Electrothrix aarhusiensis	VI	1402
829	OBEP011292771	SILVA	Mariagerfjord	Ca. Electrothrix aarhusiensis	VI	1499
830	OBEP011293015	SILVA	Mariagerfjord	Ca. Electrothrix aarhusiensis	VI	1271
831	OBEP011293016	SILVA	Mariagerfjord	Ca. Electrothrix aarhusiensis	VI	1516
832	OBEP011293164	SILVA	Mariagerfjord	Ca. Electrothrix aarhusiensis	VI	1516
833	OBEP011293308	SILVA	Mariagerfjord	Ca. Electrothrix aarhusiensis	VI	1444
834	OBEP011293636	SILVA	Mariagerfjord	Ca. Electrothrix aarhusiensis	VI	1516
835	OBEP011293642	SILVA	Mariagerfjord	Ca. Electrothrix aarhusiensis	VI	1504
836	OBEP011293675	SILVA	Mariagerfjord	Ca. Electrothrix aarhusiensis	VI	1457
837	OBEP011293809	SILVA	Mariagerfjord	Ca. Electrothrix communis	VI	1516
838	OBEP011293867	SILVA	Mariagerfjord	Ca. Electrothrix aarhusiensis	VI	1421
839	OBEP011294013	SILVA	Mariagerfjord	Ca. Electrothrix aarhusiensis	VI	1516
840	OBEP011294060	SILVA	Mariagerfjord	Ca. Electrothrix aarhusiensis	VI	1485
841	OBEP011294530	SILVA	Mariagerfjord	Ca. Electrothrix aarhusiensis	VI	1516
842	OBEP011294624	SILVA	Mariagerfjord	Ca. Electrothrix aarhusiensis	VI	1443
843	OBEP011294655	SILVA	Mariagerfjord	Ca. Electrothrix aarhusiensis	VI	1505
844	OBEP011294762	SILVA	Mariagerfjord	Ca. Electrothrix aarhusiensis	VI	1428
845	OBEP011295240	SILVA	Mariagerfjord	Ca. Electrothrix aarhusiensis	VI	1412
846	OBEP011295941	SILVA	Mariagerfjord	Ca. Electrothrix aarhusiensis	VI	1425
847	OBEP011296021	SILVA	Mariagerfjord	Ca. Electrothrix aarhusiensis	VI	1393
848	OBEP011296162	SILVA	Mariagerfjord	OBEP011364101	VI	1415
849	OBEP011296625	SILVA	Mariagerfjord	Ca. Electrothrix aarhusiensis	VI	1400
850	OBEP011296799	SILVA	Mariagerfjord	Ca. Electrothrix aarhusiensis	VI	1406
851	OBEP011296980	SILVA	Mariagerfjord	Ca. Electrothrix aarhusiensis	VI	1516
852	OBEP011297200	SILVA	Mariagerfjord	Ca. Electrothrix aarhusiensis	VI	1516
853	OBEP011298099	SILVA	Mariagerfjord	Ca. Electrothrix aarhusiensis	VI	1503
854	OBEP011298439	SILVA	Mariagerfjord	Ca. Electrothrix aarhusiensis	VI	1503
855	OBEP011298614	SILVA	Mariagerfjord	Ca. Electrothrix aarhusiensis	VI	1505
856	OBEP011298912	SILVA	Mariagerfjord	Ca. Electrothrix aarhusiensis	VI	1412
857	OBEP011298937	SILVA	Mariagerfjord	Ca. Electrothrix aarhusiensis	VI	1506
858	OBEP011299161	SILVA	Mariagerfjord	Ca. Electrothrix aarhusiensis	VI	1516
859	OBEP011299379	SILVA	Mariagerfjord	Ca. Electrothrix communis	VI	1406
860	OBEP011299500	SILVA	Mariagerfjord	Ca. Electrothrix aarhusiensis	VI	1516
861	OBEP011299515	SILVA	Mariagerfjord	Ca. Electrothrix aarhusiensis	VI	1516
862	OBEP011299713	SILVA	Mariagerfjord	Ca. Electrothrix aarhusiensis	VI	1411
863	OBEP011299917	SILVA	Mariagerfjord	Ca. Electrothrix communis	VI	1516
864	OBEP011300079	SILVA	Mariagerfjord	Ca. Electrothrix aarhusiensis	VI	1514
865	OBEP011300405	SILVA	Mariagerfjord	Ca. Electrothrix aarhusiensis	VI	1505
866	OBEP011300763	SILVA	Mariagerfjord	Ca. Electrothrix aarhusiensis	VI	1461
867	OBEP011300925	SILVA	Mariagerfjord	Ca. Electrothrix aarhusiensis	VI	1406
868	OBEP011301118	SILVA	Mariagerfjord	Ca. Electrothrix aarhusiensis	VI	1306
869	OBEP011301210	SILVA	Mariagerfjord	Ca. Electrothrix aarhusiensis	VI	1398
870	OBEP011301639	SILVA	Mariagerfjord	Ca. Electrothrix aarhusiensis	VI	1516
871	OBEP011302106	SILVA	Mariagerfjord	Ca. Electrothrix aarhusiensis	VI	1407
872	OBEP011302288	SILVA	Mariagerfjord	Ca. Electrothrix aarhusiensis	VI	1505
873	OBEP011302293	SILVA	Mariagerfjord	Ca. Electrothrix aarhusiensis	VI	1488
874	OBEP011302442	SILVA	Mariagerfjord	Ca. Electrothrix aarhusiensis	VI	1515
875	OBEP011302564	SILVA	Mariagerfjord	Ca. Electrothrix aarhusiensis	VI	1406
876	OBEP011302836	SILVA	Mariagerfjord	Ca. Electrothrix aarhusiensis	VI	1292
877	OBEP011302947	SILVA	Mariagerfjord	Ca. Electrothrix aarhusiensis	VI	1507
878	OBEP011303532	SILVA	Mariagerfjord	Ca. Electrothrix aarhusiensis	VI	1504
879	OBEP011303648	SILVA	Mariagerfjord	Ca. Electrothrix communis	VI	1516
880	OBEP011303765	SILVA	Mariagerfjord	Ca. Electrothrix communis	VI	1405
881	OBEP011304196	SILVA	Mariagerfjord	Ca. Electrothrix aarhusiensis	VI	1435
882	OBEP011304517	SILVA	Mariagerfjord	Ca. Electrothrix aarhusiensis	VI	1411
883	OBEP011304661	SILVA	Mariagerfjord	Ca. Electrothrix aarhusiensis	VI	1500
884	OBEP011304868	SILVA	Mariagerfjord	Ca. Electrothrix aarhusiensis	VI	1493
885	OBEP011305492	SILVA	Mariagerfjord	Ca. Electrothrix aarhusiensis	VI	1515
886	OBEP011306320	SILVA	Mariagerfjord	Ca. Electrothrix aarhusiensis	VI	1515
887	OBEP011306480	SILVA	Mariagerfjord	Ca. Electrothrix aarhusiensis	VI	1516
888	OBEP011306572	SILVA	Mariagerfjord	Ca. Electrothrix aarhusiensis	VI	1516
889	OBEP011306710	SILVA	Mariagerfjord	Ca. Electrothrix aarhusiensis	VI	1413
890	OBEP011307725	SILVA	Mariagerfjord	Ca. Electrothrix aarhusiensis	VI	1405
891	OBEP011307737	SILVA	Mariagerfjord	Ca. Electrothrix aarhusiensis	VI	1404
892	OBEP011307946	SILVA	Mariagerfjord	Ca. Electrothrix aarhusiensis	VI	1515
893	OBEP011308247	SILVA	Mariagerfjord	Ca. Electrothrix aarhusiensis	VI	1354
894	OBEP011308257	SILVA	Mariagerfjord	Ca. Electrothrix aarhusiensis	VI	1324
895	OBEP011308268	SILVA	Mariagerfjord	Ca. Electrothrix aarhusiensis	VI	1505
896	OBEP011308292	SILVA	Mariagerfjord	Ca. Electrothrix aarhusiensis	VI	1316
897	OBEP011308486	SILVA	Mariagerfjord	Ca. Electrothrix aarhusiensis	VI	1516
898	OBEP011308849	SILVA	Mariagerfjord	Ca. Electrothrix aarhusiensis	VI	1457
899	OBEP011309031	SILVA	Mariagerfjord	Ca. Electrothrix aarhusiensis	VI	1514
900	OBEP011309054	SILVA	Mariagerfjord	Ca. Electrothrix aarhusiensis	VI	1405
901	OBEP011309172	SILVA	Mariagerfjord	Ca. Electrothrix aarhusiensis	VI	1408
902	OBEP011309452	SILVA	Mariagerfjord	Ca. Electrothrix communis	VI	1516
903	OBEP011309485	SILVA	Mariagerfjord	Ca. Electrothrix sp. AR5	VI	1516
904	OBEP011309649	SILVA	Mariagerfjord	Ca. Electrothrix aarhusiensis	VI	1506
905	OBEP011310223	SILVA	Mariagerfjord	Ca. Electrothrix communis	VI	1406
906	OBEP011310348	SILVA	Mariagerfjord	Ca. Electrothrix aarhusiensis	VI	1337
907	OBEP011310461	SILVA	Mariagerfjord	Ca. Electrothrix aarhusiensis	VI	1466
908	OBEP011310504	SILVA	Mariagerfjord	Ca. Electrothrix aarhusiensis	VI	1283
909	OBEP011310546	SILVA	Mariagerfjord	Ca. Electrothrix aarhusiensis	VI	1406
910	OBEP011310801	SILVA	Mariagerfjord	Ca. Electrothrix aarhusiensis	VI	1514
911	OBEP011310845	SILVA	Mariagerfjord	Ca. Electrothrix aarhusiensis	VI	1406
912	OBEP011311389	SILVA	Mariagerfjord	Ca. Electrothrix aarhusiensis	VI	1515
913	OBEP011311473	SILVA	Mariagerfjord	OBEP011364101	VI	1406
914	OBEP011311696	SILVA	Mariagerfjord	Ca. Electrothrix aarhusiensis	VI	1516
915	OBEP011311745	SILVA	Mariagerfjord	Ca. Electrothrix aarhusiensis	VI	1505
916	OBEP011312236	SILVA	Mariagerfjord	Ca. Electrothrix aarhusiensis	VI	1393
917	OBEP011312702	SILVA	Mariagerfjord	Ca. Electrothrix aarhusiensis	VI	1390
918	OBEP011313027	SILVA	Mariagerfjord	Ca. Electrothrix aarhusiensis	VI	1516
919	OBEP011315280	SILVA	Mariagerfjord	Ca. Electrothrix aarhusiensis	VI	1516
920	OBEP011315642	SILVA	Mariagerfjord	Ca. Electrothrix aarhusiensis	VI	1505
921	OBEP011315757	SILVA	Mariagerfjord	Ca. Electrothrix aarhusiensis	VI	1516
922	OBEP011316343	SILVA	Mariagerfjord	Ca. Electrothrix aarhusiensis	VI	1406
923	OBEP011316909	SILVA	Mariagerfjord	Ca. Electrothrix communis	VI	1326
924	OBEP011317720	SILVA	Mariagerfjord	Ca. Electrothrix aarhusiensis	VI	1404
925	OBEP011318117	SILVA	Mariagerfjord	Ca. Electrothrix aarhusiensis	VI	1457
926	OBEP011318260	SILVA	Mariagerfjord	Ca. Electrothrix aarhusiensis	VI	1408
927	OBEP011318353	SILVA	Mariagerfjord	Ca. Electrothrix aarhusiensis	VI	1506
928	OBEP011318356	SILVA	Mariagerfjord	Ca. Electrothrix aarhusiensis	VI	1488
929	OBEP011318400	SILVA	Mariagerfjord	Ca. Electrothrix aarhusiensis	VI	1516
930	OBEP011318517	SILVA	Mariagerfjord	Ca. Electrothrix aarhusiensis	VI	1409
931	OBEP011318638	SILVA	Mariagerfjord	Ca. Electrothrix aarhusiensis	VI	1411
932	OBEP011318901	SILVA	Mariagerfjord	Ca. Electrothrix communis	VI	1515
933	OBEP011319222	SILVA	Mariagerfjord	Ca. Electrothrix aarhusiensis	VI	1515
934	OBEP011319241	SILVA	Mariagerfjord	Ca. Electrothrix aarhusiensis	VI	1503
935	OBEP011319324	SILVA	Mariagerfjord	Ca. Electrothrix sp. AR5	VI	1516
936	OBEP011319349	SILVA	Mariagerfjord	Ca. Electrothrix communis	VI	1516
937	OBEP011319353	SILVA	Mariagerfjord	Ca. Electrothrix sp. AR5	VI	1503
938	OBEP011319412	SILVA	Mariagerfjord	Ca. Electrothrix aarhusiensis	VI	1506
939	OBEP011319434	SILVA	Mariagerfjord	Ca. Electrothrix aarhusiensis	VI	1324
940	OBEP011319637	SILVA	Mariagerfjord	Ca. Electrothrix aarhusiensis	VI	1428
941	OBEP011319772	SILVA	Mariagerfjord	Ca. Electrothrix aarhusiensis	VI	1454
942	OBEP011319849	SILVA	Mariagerfjord	Ca. Electrothrix aarhusiensis	VI	1506
943	OBEP011319852	SILVA	Mariagerfjord	Ca. Electrothrix aarhusiensis	VI	1512
944	OBEP011319984	SILVA	Mariagerfjord	Ca. Electrothrix aarhusiensis	VI	1515
945	OBEP011320183	SILVA	Mariagerfjord	Ca. Electrothrix aarhusiensis	VI	1405
946	OBEP011320360	SILVA	Mariagerfjord	Ca. Electrothrix aarhusiensis	VI	1505
947	OBEP011320406	SILVA	Mariagerfjord	Ca. Electrothrix aarhusiensis	VI	1515
948	OBEP011320601	SILVA	Mariagerfjord	Ca. Electrothrix aarhusiensis	VI	1505
949	OBEP011320661	SILVA	Mariagerfjord	Ca. Electrothrix aarhusiensis	VI	1428
950	OBEP011320823	SILVA	Mariagerfjord	Ca. Electrothrix aarhusiensis	VI	1411
951	OBEP011320952	SILVA	Mariagerfjord	Ca. Electrothrix communis	VI	1516
952	OBEP011321037	SILVA	Mariagerfjord	Ca. Electrothrix aarhusiensis	VI	1318
953	OBEP011321097	SILVA	Mariagerfjord	Ca. Electrothrix aarhusiensis	VI	1429
954	OBEP011321243	SILVA	Mariagerfjord	Ca. Electrothrix aarhusiensis	VI	1516
955	OBEP011321391	SILVA	Mariagerfjord	Ca. Electrothrix aarhusiensis	VI	1516
956	OBEP011321491	SILVA	Mariagerfjord	Ca. Electrothrix aarhusiensis	VI	1245
957	OBEP011322269	SILVA	Mariagerfjord	Ca. Electrothrix aarhusiensis	VI	1404
958	OBEP011322295	SILVA	Mariagerfjord	Ca. Electrothrix communis	VI	1406
959	OBEP011322349	SILVA	Mariagerfjord	Ca. Electrothrix aarhusiensis	VI	1505
960	OBEP011322495	SILVA	Mariagerfjord	Ca. Electrothrix aarhusiensis	VI	1506
961	OBEP011323017	SILVA	Mariagerfjord	Ca. Electrothrix aarhusiensis	VI	1433
962	OBEP011323609	SILVA	Mariagerfjord	Ca. Electrothrix aarhusiensis	VI	1516
963	OBEP011323612	SILVA	Mariagerfjord	Ca. Electrothrix aarhusiensis	VI	1504
964	OBEP011323747	SILVA	Mariagerfjord	Ca. Electrothrix aarhusiensis	VI	1516
965	OBEP011323752	SILVA	Mariagerfjord	Ca. Electrothrix aarhusiensis	VI	1462
966	OBEP011324161	SILVA	Mariagerfjord	Ca. Electrothrix communis	VI	1515
967	OBEP011324164	SILVA	Mariagerfjord	Ca. Electrothrix aarhusiensis	VI	1504
968	OBEP011324196	SILVA	Mariagerfjord	Ca. Electrothrix aarhusiensis	VI	1431
969	OBEP011324798	SILVA	Mariagerfjord	Ca. Electrothrix aarhusiensis	VI	1419
970	OBEP011325658	SILVA	Mariagerfjord	Ca. Electrothrix aarhusiensis	VI	1516
971	OBEP011325724	SILVA	Mariagerfjord	Ca. Electrothrix aarhusiensis	VI	1425
972	OBEP011326069	SILVA	Mariagerfjord	Ca. Electrothrix aarhusiensis	VI	1506
973	OBEP011326135	SILVA	Mariagerfjord	Ca. Electrothrix aarhusiensis	VI	1514
974	OBEP011326282	SILVA	Mariagerfjord	Ca. Electrothrix aarhusiensis	VI	1505
975	OBEP011326412	SILVA	Mariagerfjord	Ca. Electrothrix aarhusiensis	VI	1507
976	OBEP011326521	SILVA	Mariagerfjord	Ca. Electrothrix communis	VI	1505
977	OBEP011326869	SILVA	Mariagerfjord	Ca. Electrothrix aarhusiensis	VI	1409
978	OBEP011326950	SILVA	Mariagerfjord	Ca. Electrothrix aarhusiensis	VI	1406
979	OBEP011327438	SILVA	Mariagerfjord	Ca. Electrothrix aarhusiensis	VI	1515
980	OBEP011327916	SILVA	Mariagerfjord	Ca. Electrothrix aarhusiensis	VI	1407
981	OBEP011329084	SILVA	Mariagerfjord	Ca. Electrothrix aarhusiensis	VI	1405
982	OBEP011329281	SILVA	Mariagerfjord	Ca. Electrothrix aarhusiensis	VI	1505
983	OBEP011329544	SILVA	Mariagerfjord	Ca. Electrothrix aarhusiensis	VI	1505
984	OBEP011329597	SILVA	Mariagerfjord	Ca. Electrothrix aarhusiensis	VI	1500
985	OBEP011329683	SILVA	Mariagerfjord	Ca. Electrothrix aarhusiensis	VI	1505
986	OBEP011329725	SILVA	Mariagerfjord	Ca. Electrothrix aarhusiensis	VI	1405
987	OBEP011330662	SILVA	Mariagerfjord	Ca. Electrothrix aarhusiensis	VI	1516
988	OBEP011330709	SILVA	Mariagerfjord	Ca. Electrothrix aarhusiensis	VI	1504
989	OBEP011330798	SILVA	Mariagerfjord	Ca. Electrothrix aarhusiensis	VI	1505
990	OBEP011330822	SILVA	Mariagerfjord	Ca. Electrothrix aarhusiensis	VI	1505
991	OBEP011330958	SILVA	Mariagerfjord	Ca. Electrothrix aarhusiensis	VI	1505
992	OBEP011331002	SILVA	Mariagerfjord	Ca. Electrothrix aarhusiensis	VI	1503
993	OBEP011331036	SILVA	Mariagerfjord	Ca. Electrothrix aarhusiensis	VI	1454
994	OBEP011331389	SILVA	Mariagerfjord	Ca. Electrothrix aarhusiensis	VI	1503
995	OBEP011332103	SILVA	Mariagerfjord	Ca. Electrothrix aarhusiensis	VI	1516
996	OBEP011332259	SILVA	Mariagerfjord	Ca. Electrothrix aarhusiensis	VI	1476
997	OBEP011332498	SILVA	Mariagerfjord	Ca. Electrothrix aarhusiensis	VI	1410
998	OBEP011332548	SILVA	Mariagerfjord	Ca. Electrothrix communis	VI	1411
999	OBEP011333046	SILVA	Mariagerfjord	Ca. Electrothrix aarhusiensis	VI	1406
1000	OBEP011333688	SILVA	Mariagerfjord	Ca. Electrothrix aarhusiensis	VI	1406
1001	OBEP011334251	SILVA	Mariagerfjord	Ca. Electrothrix aarhusiensis	VI	1505
1002	OBEP011334307	SILVA	Mariagerfjord	Ca. Electrothrix aarhusiensis	VI	1514
1003	OBEP011334791	SILVA	Mariagerfjord	Ca. Electrothrix aarhusiensis	VI	1505
1004	OBEP011334814	SILVA	Mariagerfjord	Ca. Electrothrix aarhusiensis	VI	1505
1005	OBEP011335246	SILVA	Mariagerfjord	Ca. Electrothrix aarhusiensis	VI	1411
1006	OBEP011335248	SILVA	Mariagerfjord	Ca. Electrothrix aarhusiensis	VI	1412
1007	OBEP011335632	SILVA	Mariagerfjord	Ca. Electrothrix aarhusiensis	VI	1512
1008	OBEP011335660	SILVA	Mariagerfjord	Ca. Electrothrix aarhusiensis	VI	1431
1009	OBEP011335983	SILVA	Mariagerfjord	Ca. Electrothrix aarhusiensis	VI	1504
1010	OBEP011336277	SILVA	Mariagerfjord	Ca. Electrothrix aarhusiensis	VI	1504
1011	OBEP011336414	SILVA	Mariagerfjord	Ca. Electrothrix aarhusiensis	VI	1406
1012	OBEP011336449	SILVA	Mariagerfjord	Ca. Electrothrix communis	VI	1503
1013	OBEP011336746	SILVA	Mariagerfjord	Ca. Electrothrix aarhusiensis	VI	1516
1014	OBEP011337092	SILVA	Mariagerfjord	Ca. Electrothrix communis	VI	1516
1015	OBEP011337231	SILVA	Mariagerfjord	Ca. Electrothrix aarhusiensis	VI	1515
1016	OBEP011337425	SILVA	Mariagerfjord	Ca. Electrothrix aarhusiensis	VI	1412
1017	OBEP011338481	SILVA	Mariagerfjord	Ca. Electrothrix aarhusiensis	VI	1516
1018	OBEP011338674	SILVA	Mariagerfjord	Ca. Electrothrix aarhusiensis	VI	1406
1019	OBEP011339130	SILVA	Mariagerfjord	Ca. Electrothrix aarhusiensis	VI	1516
1020	OBEP011339181	SILVA	Mariagerfjord	Ca. Electrothrix aarhusiensis	VI	1503
1021	OBEP011339336	SILVA	Mariagerfjord	Ca. Electrothrix communis	VI	1393
1022	OBEP011339662	SILVA	Mariagerfjord	Ca. Electrothrix aarhusiensis	VI	1406
1023	OBEP011339911	SILVA	Mariagerfjord	Ca. Electrothrix aarhusiensis	VI	1516
1024	OBEP011340312	SILVA	Mariagerfjord	OBRS01813650	VI	1405
1025	OBEP011340492	SILVA	Mariagerfjord	Ca. Electrothrix aarhusiensis	VI	1504
1026	OBEP011340592	SILVA	Mariagerfjord	Ca. Electrothrix aarhusiensis	VI	1505
1027	OBEP011340763	SILVA	Mariagerfjord	Ca. Electrothrix aarhusiensis	VI	1406
1028	OBEP011340898	SILVA	Mariagerfjord	Ca. Electrothrix aarhusiensis	VI	1407
1029	OBEP011341889	SILVA	Mariagerfjord	Ca. Electrothrix aarhusiensis	VI	1422
1030	OBEP011341934	SILVA	Mariagerfjord	Ca. Electrothrix aarhusiensis	VI	1504
1031	OBEP011342101	SILVA	Mariagerfjord	Ca. Electrothrix aarhusiensis	VI	1506
1032	OBEP011342183	SILVA	Mariagerfjord	Ca. Electrothrix aarhusiensis	VI	1409
1033	OBEP011342257	SILVA	Mariagerfjord	Ca. Electrothrix aarhusiensis	VI	1207
1034	OBEP011342486	SILVA	Mariagerfjord	Ca. Electrothrix aarhusiensis	VI	1506
1035	OBEP011342487	SILVA	Mariagerfjord	Ca. Electrothrix aarhusiensis	VI	1412
1036	OBEP011343192	SILVA	Mariagerfjord	Ca. Electrothrix aarhusiensis	VI	1503
1037	OBEP011343981	SILVA	Mariagerfjord	OBEP011364101	VI	1351
1038	OBEP011344117	SILVA	Mariagerfjord	Ca. Electrothrix aarhusiensis	VI	1505
1039	OBEP011344148	SILVA	Mariagerfjord	Ca. Electrothrix aarhusiensis	VI	1337
1040	OBEP011344476	SILVA	Mariagerfjord	Ca. Electrothrix aarhusiensis	VI	1505
1041	OBEP011344517	SILVA	Mariagerfjord	Ca. Electrothrix aarhusiensis	VI	1505
1042	OBEP011344789	SILVA	Mariagerfjord	Ca. Electrothrix aarhusiensis	VI	1316
1043	OBEP011344856	SILVA	Mariagerfjord	Ca. Electrothrix aarhusiensis	VI	1404
1044	OBEP011345253	SILVA	Mariagerfjord	Ca. Electrothrix aarhusiensis	VI	1516
1045	OBEP011345262	SILVA	Mariagerfjord	Ca. Electrothrix aarhusiensis	VI	1516
1046	OBEP011345318	SILVA	Mariagerfjord	Ca. Electrothrix communis	VI	1412
1047	OBEP011345407	SILVA	Mariagerfjord	Ca. Electrothrix aarhusiensis	VI	1516
1048	OBEP011345457	SILVA	Mariagerfjord	Ca. Electrothrix aarhusiensis	VI	1504
1049	OBEP011345532	SILVA	Mariagerfjord	Ca. Electrothrix aarhusiensis	VI	1515
1050	OBEP011346696	SILVA	Mariagerfjord	Ca. Electrothrix aarhusiensis	VI	1516
1051	OBEP011347085	SILVA	Mariagerfjord	Ca. Electrothrix communis	VI	1506
1052	OBEP011347143	SILVA	Mariagerfjord	Ca. Electrothrix aarhusiensis	VI	1404
1053	OBEP011347490	SILVA	Mariagerfjord	Ca. Electrothrix aarhusiensis	VI	1409
1054	OBEP011347628	SILVA	Mariagerfjord	Ca. Electrothrix aarhusiensis	VI	1504
1055	OBEP011347676	SILVA	Mariagerfjord	Ca. Electrothrix aarhusiensis	VI	1515
1056	OBEP011347704	SILVA	Mariagerfjord	Ca. Electrothrix sp. AR5	VI	1506
1057	OBEP011347726	SILVA	Mariagerfjord	Ca. Electrothrix aarhusiensis	VI	1408
1058	OBEP011347992	SILVA	Mariagerfjord	Ca. Electrothrix aarhusiensis	VI	1516
1059	OBEP011348002	SILVA	Mariagerfjord	Ca. Electrothrix communis	VI	1402
1060	OBEP011348098	SILVA	Mariagerfjord	Ca. Electrothrix aarhusiensis	VI	1505
1061	OBEP011348139	SILVA	Mariagerfjord	Ca. Electrothrix aarhusiensis	VI	1404
1062	OBEP011348157	SILVA	Mariagerfjord	Ca. Electrothrix aarhusiensis	VI	1422
1063	OBEP011348619	SILVA	Mariagerfjord	Ca. Electrothrix aarhusiensis	VI	1507
1064	OBEP011348952	SILVA	Mariagerfjord	Ca. Electrothrix communis	VI	1516
1065	OBEP011349061	SILVA	Mariagerfjord	Ca. Electrothrix aarhusiensis	VI	1507
1066	OBEP011349295	SILVA	Mariagerfjord	Ca. Electrothrix aarhusiensis	VI	1516
1067	OBEP011349328	SILVA	Mariagerfjord	Ca. Electrothrix aarhusiensis	VI	1407
1068	OBEP011350001	SILVA	Mariagerfjord	Ca. Electrothrix aarhusiensis	VI	1305
1069	OBEP011350284	SILVA	Mariagerfjord	Ca. Electrothrix communis	VI	1383
1070	OBEP011350387	SILVA	Mariagerfjord	Ca. Electrothrix aarhusiensis	VI	1393
1071	OBEP011350555	SILVA	Mariagerfjord	Ca. Electrothrix aarhusiensis	VI	1408
1072	OBEP011350627	SILVA	Mariagerfjord	Ca. Electrothrix aarhusiensis	VI	1516
1073	OBEP011350680	SILVA	Mariagerfjord	Ca. Electrothrix sp. AR5	VI	1514
1074	OBEP011351047	SILVA	Mariagerfjord	Ca. Electrothrix aarhusiensis	VI	1404
1075	OBEP011351089	SILVA	Mariagerfjord	Ca. Electrothrix aarhusiensis	VI	1516
1076	OBEP011351580	SILVA	Mariagerfjord	Ca. Electrothrix aarhusiensis	VI	1410
1077	OBEP011352625	SILVA	Mariagerfjord	Ca. Electrothrix aarhusiensis	VI	1429
1078	OBEP011352643	SILVA	Mariagerfjord	Ca. Electrothrix aarhusiensis	VI	1506
1079	OBEP011352807	SILVA	Mariagerfjord	Ca. Electrothrix aarhusiensis	VI	1506
1080	OBEP011353108	SILVA	Mariagerfjord	Ca. Electrothrix aarhusiensis	VI	1516
1081	OBEP011353309	SILVA	Mariagerfjord	Ca. Electrothrix aarhusiensis	VI	1493
1082	OBEP011353729	SILVA	Mariagerfjord	Ca. Electrothrix aarhusiensis	VI	1514
1083	OBEP011354295	SILVA	Mariagerfjord	Ca. Electrothrix aarhusiensis	VI	1517
1084	OBEP011354702	SILVA	Mariagerfjord	Ca. Electrothrix aarhusiensis	VI	1516
1085	OBEP011354930	SILVA	Mariagerfjord	Ca. Electrothrix aarhusiensis	VI	1505
1086	OBEP011354980	SILVA	Mariagerfjord	Ca. Electrothrix aarhusiensis	VI	1505
1087	OBEP011354987	SILVA	Mariagerfjord	Ca. Electrothrix aarhusiensis	VI	1505
1088	OBEP011355088	SILVA	Mariagerfjord	Ca. Electrothrix aarhusiensis	VI	1406
1089	OBEP011355250	SILVA	Mariagerfjord	Ca. Electrothrix aarhusiensis	VI	1516
1090	OBEP011355390	SILVA	Mariagerfjord	Ca. Electrothrix aarhusiensis	VI	1516
1091	OBEP011355605	SILVA	Mariagerfjord	Ca. Electrothrix aarhusiensis	VI	1425
1092	OBEP011355863	SILVA	Mariagerfjord	Ca. Electrothrix aarhusiensis	VI	1459
1093	OBEP011355892	SILVA	Mariagerfjord	Ca. Electrothrix communis	VI	1363
1094	OBEP011355931	SILVA	Mariagerfjord	Ca. Electrothrix aarhusiensis	VI	1436
1095	OBEP011356647	SILVA	Mariagerfjord	Ca. Electrothrix aarhusiensis	VI	1406
1096	OBEP011356649	SILVA	Mariagerfjord	Ca. Electrothrix aarhusiensis	VI	1513
1097	OBEP011356815	SILVA	Mariagerfjord	Ca. Electrothrix aarhusiensis	VI	1411
1098	OBEP011356984	SILVA	Mariagerfjord	Ca. Electrothrix aarhusiensis	VI	1516
1099	OBEP011357333	SILVA	Mariagerfjord	Ca. Electrothrix sp. AR5	VI	1411
1100	OBEP011357532	SILVA	Mariagerfjord	Ca. Electrothrix aarhusiensis	VI	1365
1101	OBEP011358053	SILVA	Mariagerfjord	Ca. Electrothrix aarhusiensis	VI	1505
1102	OBEP011358619	SILVA	Mariagerfjord	Ca. Electrothrix aarhusiensis	VI	1406
1103	OBEP011358807	SILVA	Mariagerfjord	Ca. Electrothrix aarhusiensis	VI	1405
1104	OBEP011358860	SILVA	Mariagerfjord	Ca. Electrothrix aarhusiensis	VI	1505
1105	OBEP011358866	SILVA	Mariagerfjord	Ca. Electrothrix aarhusiensis	VI	1515
1106	OBEP011359012	SILVA	Mariagerfjord	Ca. Electrothrix aarhusiensis	VI	1516
1107	OBEP011359177	SILVA	Mariagerfjord	Ca. Electrothrix aarhusiensis	VI	1461
1108	OBEP011359492	SILVA	Mariagerfjord	Ca. Electrothrix communis	VI	1516
1109	OBEP011359898	SILVA	Mariagerfjord	Ca. Electrothrix aarhusiensis	VI	1373
1110	OBEP011360335	SILVA	Mariagerfjord	Ca. Electrothrix aarhusiensis	VI	1515
1111	OBEP011360373	SILVA	Mariagerfjord	Ca. Electrothrix aarhusiensis	VI	1216
1112	OBEP011360913	SILVA	Mariagerfjord	Ca. Electrothrix aarhusiensis	VI	1487
1113	OBEP011361241	SILVA	Mariagerfjord	Ca. Electrothrix communis	VI	1516
1114	OBEP011361300	SILVA	Mariagerfjord	Ca. Electrothrix aarhusiensis	VI	1506
1115	OBEP011361391	SILVA	Mariagerfjord	Ca. Electrothrix aarhusiensis	VI	1412
1116	OBEP011361653	SILVA	Mariagerfjord	Ca. Electrothrix aarhusiensis	VI	1495
1117	OBEP011361735	SILVA	Mariagerfjord	Ca. Electrothrix aarhusiensis	VI	1406
1118	OBEP011361850	SILVA	Mariagerfjord	Ca. Electrothrix aarhusiensis	VI	1407
1119	OBEP011362193	SILVA	Mariagerfjord	Ca. Electrothrix communis	VI	1516
1120	OBEP011362817	SILVA	Mariagerfjord	Ca. Electrothrix aarhusiensis	VI	1412
1121	OBEP011362996	SILVA	Mariagerfjord	Ca. Electrothrix aarhusiensis	VI	1268
1122	OBEP011363264	SILVA	Mariagerfjord	Ca. Electrothrix aarhusiensis	VI	1504
1123	OBEP011364101	SILVA	Mariagerfjord	OBEP011364101	VI	1511
1124	OBEP011364471	SILVA	Mariagerfjord	Ca. Electrothrix aarhusiensis	VI	1511
1125	OBEP011364629	SILVA	Mariagerfjord	Ca. Electrothrix aarhusiensis	VI	1418
1126	OBEP011364693	SILVA	Mariagerfjord	Ca. Electrothrix aarhusiensis	VI	1505
1127	OBEP011364744	SILVA	Mariagerfjord	Ca. Electrothrix aarhusiensis	VI	1406
1128	OBEP011365083	SILVA	Mariagerfjord	Ca. Electrothrix aarhusiensis	VI	1516
1129	OBEP011365213	SILVA	Mariagerfjord	Ca. Electrothrix aarhusiensis	VI	1516
1130	OBEP011365755	SILVA	Mariagerfjord	Ca. Electrothrix aarhusiensis	VI	1516
1131	OBEP011366568	SILVA	Mariagerfjord	Ca. Electrothrix aarhusiensis	VI	1406
1132	OBEP011366691	SILVA	Mariagerfjord	Ca. Electrothrix aarhusiensis	VI	1516
1133	OBEP011366752	SILVA	Mariagerfjord	Ca. Electrothrix communis	VI	1516
1134	OBEP011366898	SILVA	Mariagerfjord	Ca. Electrothrix aarhusiensis	VI	1361
1135	OBEP011367208	SILVA	Mariagerfjord	Ca. Electrothrix aarhusiensis	VI	1505
1136	OBEP011367391	SILVA	Mariagerfjord	Ca. Electrothrix aarhusiensis	VI	1515
1137	OBEP011368273	SILVA	Mariagerfjord	Ca. Electrothrix aarhusiensis	VI	1516
1138	OBEP011368282	SILVA	Mariagerfjord	Ca. Electrothrix aarhusiensis	VI	1506
1139	OBEP011368295	SILVA	Mariagerfjord	Ca. Electrothrix aarhusiensis	VI	1516
1140	OBEP011368416	SILVA	Mariagerfjord	Ca. Electrothrix aarhusiensis	VI	1393
1141	OBEP011368502	SILVA	Mariagerfjord	Ca. Electrothrix communis	VI	1516
1142	OBEP011368821	SILVA	Mariagerfjord	Ca. Electrothrix aarhusiensis	VI	1514
1143	OBEP011369392	SILVA	Mariagerfjord	Ca. Electrothrix aarhusiensis	VI	1403
1144	OBEP011369614	SILVA	Mariagerfjord	Ca. Electrothrix aarhusiensis	VI	1516
1145	OBEP011369832	SILVA	Mariagerfjord	Ca. Electrothrix aarhusiensis	VI	1406
1146	OBEP011369841	SILVA	Mariagerfjord	Ca. Electrothrix communis	VI	1407
1147	OBEP011370084	SILVA	Mariagerfjord	Ca. Electrothrix aarhusiensis	VI	1515
1148	OBEP011370406	SILVA	Mariagerfjord	Ca. Electrothrix aarhusiensis	VI	1516
1149	OBEP011370479	SILVA	Mariagerfjord	Ca. Electrothrix aarhusiensis	VI	1516
1150	OBEP011370790	SILVA	Mariagerfjord	Ca. Electrothrix aarhusiensis	VI	1505
1151	OBEP011370956	SILVA	Mariagerfjord	Ca. Electrothrix aarhusiensis	VI	1407
1152	OBEP011371089	SILVA	Mariagerfjord	Ca. Electrothrix aarhusiensis	VI	1430
1153	OBEP011371241	SILVA	Mariagerfjord	Ca. Electrothrix aarhusiensis	VI	1406
1154	OBEP011371423	SILVA	Mariagerfjord	Ca. Electrothrix aarhusiensis	VI	1413
1155	OBEP011371534	SILVA	Mariagerfjord	Ca. Electrothrix aarhusiensis	VI	1516
1156	OBEP011371564	SILVA	Mariagerfjord	Ca. Electrothrix aarhusiensis	VI	1412
1157	OBEP011371686	SILVA	Mariagerfjord	Ca. Electrothrix communis	VI	1336
1158	OBEP011372037	SILVA	Mariagerfjord	Ca. Electrothrix aarhusiensis	VI	1306
1159	OBEP011372113	SILVA	Mariagerfjord	Ca. Electrothrix aarhusiensis	VI	1408
1160	OBEP011372341	SILVA	Mariagerfjord	Ca. Electrothrix aarhusiensis	VI	1507
1161	OBEP011372419	SILVA	Mariagerfjord	Ca. Electrothrix aarhusiensis	VI	1406
1162	OBEP011372483	SILVA	Mariagerfjord	Ca. Electrothrix aarhusiensis	VI	1516
1163	OBEP011372943	SILVA	Mariagerfjord	Ca. Electrothrix aarhusiensis	VI	1516
1164	OBEP011373242	SILVA	Mariagerfjord	Ca. Electrothrix aarhusiensis	VI	1515
1165	OBEP011373332	SILVA	Mariagerfjord	Ca. Electrothrix aarhusiensis	VI	1505
1166	OBEP011373346	SILVA	Mariagerfjord	Ca. Electrothrix aarhusiensis	VI	1410
1167	OBEP011373372	SILVA	Mariagerfjord	Ca. Electrothrix aarhusiensis	VI	1516
1168	OBEP011373526	SILVA	Mariagerfjord	Ca. Electrothrix aarhusiensis	VI	1507
1169	OBEP011373569	SILVA	Mariagerfjord	Ca. Electrothrix aarhusiensis	VI	1516
1170	OBEP011373607	SILVA	Mariagerfjord	Ca. Electrothrix aarhusiensis	VI	1271
1171	OBEP011373620	SILVA	Mariagerfjord	Ca. Electrothrix aarhusiensis	VI	1505
1172	OBEP011373734	SILVA	Mariagerfjord	Ca. Electrothrix aarhusiensis	VI	1412
1173	OBEP011374011	SILVA	Mariagerfjord	Ca. Electrothrix aarhusiensis	VI	1410
1174	OBEP011374150	SILVA	Mariagerfjord	Ca. Electrothrix aarhusiensis	VI	1405
1175	OBEP011374198	SILVA	Mariagerfjord	Ca. Electrothrix aarhusiensis	VI	1407
1176	OBEP011374939	SILVA	Mariagerfjord	Ca. Electrothrix aarhusiensis	VI	1505
1177	OBEP011375369	SILVA	Mariagerfjord	Ca. Electrothrix aarhusiensis	VI	1406
1178	OBEP011376063	SILVA	Mariagerfjord	Ca. Electrothrix aarhusiensis	VI	1506
1179	OBEP011376113	SILVA	Mariagerfjord	Ca. Electrothrix aarhusiensis	VI	1505
1180	OBEP011376122	SILVA	Mariagerfjord	Ca. Electrothrix aarhusiensis	VI	1516
1181	OBEP011376225	SILVA	Mariagerfjord	Ca. Electrothrix communis	VI	1516
1182	OBEP011376256	SILVA	Mariagerfjord	Ca. Electrothrix aarhusiensis	VI	1406
1183	OBEP011376576	SILVA	Mariagerfjord	Ca. Electrothrix aarhusiensis	VI	1516
1184	OBEP011377101	SILVA	Mariagerfjord	Ca. Electrothrix aarhusiensis	VI	1406
1185	OBEP011377279	SILVA	Mariagerfjord	Ca. Electrothrix aarhusiensis	VI	1406
1186	OBEP011377475	SILVA	Mariagerfjord	Ca. Electrothrix aarhusiensis	VI	1503
1187	OBEP011377923	SILVA	Mariagerfjord	Ca. Electrothrix aarhusiensis	VI	1516
1188	OBEP011378013	SILVA	Mariagerfjord	Ca. Electrothrix aarhusiensis	VI	1500
1189	OBEP011378436	SILVA	Mariagerfjord	Ca. Electrothrix aarhusiensis	VI	1503
1190	OBEP011378662	SILVA	Mariagerfjord	Ca. Electrothrix aarhusiensis	VI	1515
1191	OBEP011379000	SILVA	Mariagerfjord	Ca. Electrothrix communis	VI	1514
1192	OBEP011379157	SILVA	Mariagerfjord	Ca. Electrothrix aarhusiensis	VI	1506
1193	OBEP011379208	SILVA	Mariagerfjord	Ca. Electrothrix aarhusiensis	VI	1516
1194	OBEP011379219	SILVA	Mariagerfjord	Ca. Electrothrix aarhusiensis	VI	1503
1195	OBEP011379233	SILVA	Mariagerfjord	Ca. Electrothrix aarhusiensis	VI	1405
1196	OBEP011379496	SILVA	Mariagerfjord	Ca. Electrothrix aarhusiensis	VI	1404
1197	OBEP011379743	SILVA	Mariagerfjord	Ca. Electrothrix aarhusiensis	VI	1503
1198	OBEP011379760	SILVA	Mariagerfjord	Ca. Electrothrix aarhusiensis	VI	1504
1199	OBEP011379954	SILVA	Mariagerfjord	Ca. Electrothrix aarhusiensis	VI	1405
1200	OBEP011380995	SILVA	Mariagerfjord	Ca. Electrothrix aarhusiensis	VI	1515
1201	OBEP011381029	SILVA	Mariagerfjord	Ca. Electrothrix aarhusiensis	VI	1516
1202	OBEP011381350	SILVA	Mariagerfjord	Ca. Electrothrix aarhusiensis	VI	1505
1203	OBEP011381716	SILVA	Mariagerfjord	Ca. Electrothrix aarhusiensis	VI	1411
1204	OBEP011382048	SILVA	Mariagerfjord	Ca. Electrothrix communis	VI	1513
1205	OBEP011382088	SILVA	Mariagerfjord	Ca. Electrothrix communis	VI	1516
1206	OBEP011382121	SILVA	Mariagerfjord	Ca. Electrothrix aarhusiensis	VI	1423
1207	OBEP011382575	SILVA	Mariagerfjord	Ca. Electrothrix aarhusiensis	VI	1516
1208	OBEP011382706	SILVA	Mariagerfjord	Ca. Electrothrix aarhusiensis	VI	1490
1209	OBEP011382918	SILVA	Mariagerfjord	Ca. Electrothrix aarhusiensis	VI	1407
1210	OBEP011383275	SILVA	Mariagerfjord	Ca. Electrothrix aarhusiensis	VI	1501
1211	OBEP011384079	SILVA	Mariagerfjord	Ca. Electrothrix aarhusiensis	VI	1504
1212	OBEP011384618	SILVA	Mariagerfjord	Ca. Electrothrix aarhusiensis	VI	1514
1213	OBEP011384776	SILVA	Mariagerfjord	Ca. Electrothrix aarhusiensis	VI	1453
1214	OBEP011384881	SILVA	Mariagerfjord	Ca. Electrothrix aarhusiensis	VI	1404
1215	OBEP011384943	SILVA	Mariagerfjord	Ca. Electrothrix aarhusiensis	VI	1418
1216	OBEP011385301	SILVA	Mariagerfjord	Ca. Electrothrix aarhusiensis	VI	1446
1217	OBEP011386002	SILVA	Mariagerfjord	Ca. Electrothrix aarhusiensis	VI	1504
1218	OBEP011386292	SILVA	Mariagerfjord	Ca. Electrothrix aarhusiensis	VI	1514
1219	OBEP011386363	SILVA	Mariagerfjord	Ca. Electrothrix aarhusiensis	VI	1405
1220	OBEP011386596	SILVA	Mariagerfjord	Ca. Electrothrix aarhusiensis	VI	1507
1221	OBEP011387612	SILVA	Mariagerfjord	Ca. Electrothrix aarhusiensis	VI	1506
1222	OBEP011387647	SILVA	Mariagerfjord	Ca. Electrothrix aarhusiensis	VI	1503
1223	OBEP011387755	SILVA	Mariagerfjord	Ca. Electrothrix aarhusiensis	VI	1431
1224	OBEP011387878	SILVA	Mariagerfjord	Ca. Electrothrix aarhusiensis	VI	1505
1225	OBEP011387999	SILVA	Mariagerfjord	Ca. Electrothrix aarhusiensis	VI	1516
1226	OBEP011388514	SILVA	Mariagerfjord	Ca. Electrothrix aarhusiensis	VI	1514
1227	OBEP011388770	SILVA	Mariagerfjord	Ca. Electrothrix aarhusiensis	VI	1353
1228	OBEP011388989	SILVA	Mariagerfjord	Ca. Electrothrix aarhusiensis	VI	1515
1229	OBEP011389027	SILVA	Mariagerfjord	Ca. Electrothrix aarhusiensis	VI	1516
1230	OBEP011389179	SILVA	Mariagerfjord	Ca. Electrothrix aarhusiensis	VI	1467
1231	OBEP011389345	SILVA	Mariagerfjord	Ca. Electrothrix aarhusiensis	VI	1513
1232	OBEP011390119	SILVA	Mariagerfjord	Ca. Electrothrix aarhusiensis	VI	1406
1233	OBEP011390414	SILVA	Mariagerfjord	Ca. Electrothrix aarhusiensis	VI	1507
1234	OBEP011390472	SILVA	Mariagerfjord	Ca. Electrothrix aarhusiensis	VI	1421
1235	OBEP011390519	SILVA	Mariagerfjord	Ca. Electrothrix aarhusiensis	VI	1406
1236	OBEP011390543	SILVA	Mariagerfjord	Ca. Electrothrix aarhusiensis	VI	1516
1237	OBEP011390698	SILVA	Mariagerfjord	Ca. Electrothrix aarhusiensis	VI	1405
1238	OBEP011390790	SILVA	Mariagerfjord	Ca. Electrothrix aarhusiensis	VI	1226
1239	OBEP011391203	SILVA	Mariagerfjord	Ca. Electrothrix sp. AR5	VI	1516
1240	OBEP011391249	SILVA	Mariagerfjord	Ca. Electrothrix sp. AR5	VI	1516
1241	OBEP011391367	SILVA	Mariagerfjord	Ca. Electrothrix aarhusiensis	VI	1516
1242	OBEP011391523	SILVA	Mariagerfjord	Ca. Electrothrix aarhusiensis	VI	1505
1243	OBEP011391977	SILVA	Mariagerfjord	Ca. Electrothrix aarhusiensis	VI	1514
1244	OBEP011392405	SILVA	Mariagerfjord	Ca. Electrothrix aarhusiensis	VI	1516
1245	OBEP011392492	SILVA	Mariagerfjord	Ca. Electrothrix aarhusiensis	VI	1514
1246	OBEP011392772	SILVA	Mariagerfjord	Ca. Electrothrix aarhusiensis	VI	1408
1247	OBEP011392869	SILVA	Mariagerfjord	Ca. Electrothrix aarhusiensis	VI	1503
1248	OBEP011393449	SILVA	Mariagerfjord	Ca. Electrothrix aarhusiensis	VI	1515
1249	OBEP011393651	SILVA	Mariagerfjord	Ca. Electrothrix aarhusiensis	VI	1503
1250	OBEP011393981	SILVA	Mariagerfjord	Ca. Electrothrix aarhusiensis	VI	1407
1251	OBEP011393984	SILVA	Mariagerfjord	Ca. Electrothrix aarhusiensis	VI	1407
1252	OBEP011394410	SILVA	Mariagerfjord	Ca. Electrothrix aarhusiensis	VI	1516
1253	OBEP011394455	SILVA	Mariagerfjord	Ca. Electrothrix aarhusiensis	VI	1503
1254	OBEP011395636	SILVA	Mariagerfjord	Ca. Electrothrix aarhusiensis	VI	1475
1255	OBEP011395808	SILVA	Mariagerfjord	Ca. Electrothrix aarhusiensis	VI	1515
1256	OBEP011396111	SILVA	Mariagerfjord	Ca. Electrothrix aarhusiensis	VI	1349
1257	OBEP011396124	SILVA	Mariagerfjord	Ca. Electrothrix aarhusiensis	VI	1516
1258	OBEP011396137	SILVA	Mariagerfjord	Ca. Electrothrix aarhusiensis	VI	1505
1259	OBEP011396614	SILVA	Mariagerfjord	Ca. Electrothrix aarhusiensis	VI	1516
1260	OBEP011396657	SILVA	Mariagerfjord	OBRS01419531	VI	1507
1261	OBEP011396758	SILVA	Mariagerfjord	Ca. Electrothrix aarhusiensis	VI	1405
1262	OBEP011396788	SILVA	Mariagerfjord	Ca. Electrothrix aarhusiensis	VI	1516
1263	OBEP011396916	SILVA	Mariagerfjord	Ca. Electrothrix aarhusiensis	VI	1505
1264	OBEP011396934	SILVA	Mariagerfjord	Ca. Electrothrix aarhusiensis	VI	1505
1265	OBEP011396960	SILVA	Mariagerfjord	Ca. Electrothrix aarhusiensis	VI	1408
1266	OBEP011397015	SILVA	Mariagerfjord	Ca. Electrothrix aarhusiensis	VI	1516
1267	OBEP011397233	SILVA	Mariagerfjord	Ca. Electrothrix aarhusiensis	VI	1365
1268	OBEP011397353	SILVA	Mariagerfjord	Ca. Electrothrix aarhusiensis	VI	1330
1269	OBEP011397547	SILVA	Mariagerfjord	Ca. Electrothrix aarhusiensis	VI	1392
1270	OBEP011398329	SILVA	Mariagerfjord	Ca. Electrothrix aarhusiensis	VI	1516
1271	OBEP011398463	SILVA	Mariagerfjord	Ca. Electrothrix aarhusiensis	VI	1516
1272	OBEP011398464	SILVA	Mariagerfjord	Ca. Electrothrix aarhusiensis	VI	1516
1273	OBEP011399032	SILVA	Mariagerfjord	Ca. Electrothrix communis	VI	1516
1274	OBEP011399157	SILVA	Mariagerfjord	Ca. Electrothrix aarhusiensis	VI	1515
1275	OBEP011399441	SILVA	Mariagerfjord	Ca. Electrothrix aarhusiensis	VI	1403
1276	OBEP011399448	SILVA	Mariagerfjord	Ca. Electrothrix aarhusiensis	VI	1404
1277	OBEP011399449	SILVA	Mariagerfjord	Ca. Electrothrix aarhusiensis	VI	1493
1278	OBEP011399769	SILVA	Mariagerfjord	Ca. Electrothrix aarhusiensis	VI	1505
1279	OBEP011399854	SILVA	Mariagerfjord	Ca. Electrothrix aarhusiensis	VI	1406
1280	OBEP011399904	SILVA	Mariagerfjord	Ca. Electrothrix aarhusiensis	VI	1411
1281	OBEP011400164	SILVA	Mariagerfjord	Ca. Electrothrix aarhusiensis	VI	1504
1282	OBEP011400425	SILVA	Mariagerfjord	Ca. Electrothrix aarhusiensis	VI	1412
1283	OBEP011401101	SILVA	Mariagerfjord	Ca. Electrothrix aarhusiensis	VI	1282
1284	OBEP011401130	SILVA	Mariagerfjord	Ca. Electrothrix aarhusiensis	VI	1516
1285	OBEP011401453	SILVA	Mariagerfjord	Ca. Electrothrix aarhusiensis	VI	1401
1286	OBEP011402305	SILVA	Mariagerfjord	Ca. Electrothrix aarhusiensis	VI	1506
1287	OBEP011402452	SILVA	Mariagerfjord	Ca. Electrothrix aarhusiensis	VI	1478
1288	OBEP011402475	SILVA	Mariagerfjord	Ca. Electrothrix aarhusiensis	VI	1284
1289	OBEP011402926	SILVA	Mariagerfjord	Ca. Electrothrix communis	VI	1328
1290	OBEP011402993	SILVA	Mariagerfjord	Ca. Electrothrix aarhusiensis	VI	1516
1291	OBEP011403169	SILVA	Mariagerfjord	Ca. Electrothrix aarhusiensis	VI	1505
1292	OBEP011403290	SILVA	Mariagerfjord	Ca. Electrothrix communis	VI	1516
1293	OBEP011404090	SILVA	Mariagerfjord	Ca. Electrothrix aarhusiensis	VI	1410
1294	OBEP011404174	SILVA	Mariagerfjord	Ca. Electrothrix aarhusiensis	VI	1515
1295	OBEP011404197	SILVA	Mariagerfjord	Ca. Electrothrix aarhusiensis	VI	1389
1296	OBEP011404341	SILVA	Mariagerfjord	Ca. Electrothrix aarhusiensis	VI	1516
1297	OBEP011404437	SILVA	Mariagerfjord	OBEP010114380	VI	1308
1298	OBEP011404621	SILVA	Mariagerfjord	Ca. Electrothrix aarhusiensis	VI	1301
1299	OBEP011404707	SILVA	Mariagerfjord	Ca. Electrothrix aarhusiensis	VI	1516
1300	OBEP011404922	SILVA	Mariagerfjord	Ca. Electrothrix aarhusiensis	VI	1516
1301	OBEP011405241	SILVA	Mariagerfjord	Ca. Electrothrix aarhusiensis	VI	1453
1302	OBEP011405258	SILVA	Mariagerfjord	Ca. Electrothrix aarhusiensis	VI	1500
1303	OBEP011405383	SILVA	Mariagerfjord	Ca. Electrothrix aarhusiensis	VI	1516
1304	OBEP011405460	SILVA	Mariagerfjord	Ca. Electrothrix aarhusiensis	VI	1516
1305	OBEP011405500	SILVA	Mariagerfjord	Ca. Electrothrix aarhusiensis	VI	1284
1306	OBEP011405951	SILVA	Mariagerfjord	Ca. Electrothrix communis	VI	1406
1307	OBEP011406878	SILVA	Mariagerfjord	Ca. Electrothrix aarhusiensis	VI	1292
1308	OBEP011406924	SILVA	Mariagerfjord	Ca. Electrothrix aarhusiensis	VI	1213
1309	OBEP011413657	SILVA	sd11	Ca. Electrothrix aarhusiensis	VI	1392
1310	OBEP011450028	SILVA	Fano	Ca. Electrothrix communis	VI	1516
1311	OBEP011450770	SILVA	Fano	Ca. Electrothrix communis	VI	1515
1312	OBEP011451290	SILVA	Fano	OBRS01813650	VI	1504
1313	OBEP011452555	SILVA	Fano	Ca. Electrothrix communis	VI	1516
1314	OBEP011452735	SILVA	Fano	OBRS01813650	VI	1509
1315	OBEP011453317	SILVA	Fano	Ca. Electrothrix aarhusiensis	VI	1505
1316	OBEP011453896	SILVA	Fano	Ca. Electrothrix communis	VI	1516
1317	OBEP011454059	SILVA	Fano	Ca. Electrothrix aarhusiensis	VI	1357
1318	OBEP011454100	SILVA	Fano	OBRS01813650	VI	1366
1319	OBEP011454229	SILVA	Fano	OBEP011479329	VI	1516
1320	OBEP011454280	SILVA	Fano	Ca. Electrothrix communis	VI	1516
1321	OBEP011454744	SILVA	Fano	OBRS01813650	VI	1516
1322	OBEP011455178	SILVA	Fano	Ca. Electrothrix aarhusiensis	VI	1504
1323	OBEP011455229	SILVA	Fano	Ca. Electrothrix communis	VI	1515
1324	OBEP011455303	SILVA	Fano	OBEP010114380	VI	1516
1325	OBEP011455304	SILVA	Fano	Ca. Electrothrix aarhusiensis	VI	1514
1326	OBEP011455555	SILVA	Fano	Ca. Electrothrix communis	VI	1318
1327	OBEP011455907	SILVA	Fano	Ca. Electrothrix communis	VI	1504
1328	OBEP011456076	SILVA	Fano	OBRS01813650	VI	1369
1329	OBEP011456272	SILVA	Fano	Ca. Electrothrix communis	VI	1479
1330	OBEP011456377	SILVA	Fano	Ca. Electrothrix communis	VI	1406
1331	OBEP011457001	SILVA	Fano	Ca. Electrothrix communis	VI	1376
1332	OBEP011457157	SILVA	Fano	Ca. Electrothrix communis	VI	1513
1333	OBEP011457213	SILVA	Fano	OBRS01813650	VI	1515
1334	OBEP011457477	SILVA	Fano	OBRS01813650	VI	1404
1335	OBEP011457847	SILVA	Fano	Ca. Electrothrix communis	VI	1516
1336	OBEP011458020	SILVA	Fano	OBRS01813650	VI	1357
1337	OBEP011458137	SILVA	Fano	Ca. Electrothrix communis	VI	1420
1338	OBEP011458634	SILVA	Fano	Ca. Electrothrix communis	VI	1406
1339	OBEP011458756	SILVA	Fano	Ca. Electrothrix communis	VI	1406
1340	OBEP011459281	SILVA	Fano	Ca. Electrothrix communis	VI	1505
1341	OBEP011459472	SILVA	Fano	Ca. Electrothrix communis	VI	1505
1342	OBEP011459616	SILVA	Fano	Ca. Electrothrix communis	VI	1516
1343	OBEP011459625	SILVA	Fano	Ca. Electrothrix communis	VI	1516
1344	OBEP011459903	SILVA	Fano	Ca. Electrothrix communis	VI	1517
1345	OBEP011460249	SILVA	Fano	Ca. Electrothrix communis	VI	1516
1346	OBEP011460626	SILVA	Fano	OBEP011479329	VI	1516
1347	OBEP011461075	SILVA	Fano	OBEP011479329	VI	1515
1348	OBEP011461483	SILVA	Fano	Ca. Electrothrix communis	VI	1409
1349	OBEP011462060	SILVA	Fano	Ca. Electrothrix aarhusiensis	VI	1396
1350	OBEP011462079	SILVA	Fano	Ca. Electrothrix communis	VI	1516
1351	OBEP011464013	SILVA	Fano	Ca. Electrothrix communis	VI	1505
1352	OBEP011464015	SILVA	Fano	Ca. Electrothrix communis	VI	1417
1353	OBEP011464255	SILVA	Fano	Ca. Electrothrix communis	VI	1410
1354	OBEP011464275	SILVA	Fano	Ca. Electrothrix aarhusiensis	VI	1503
1355	OBEP011464640	SILVA	Fano	Ca. Electrothrix communis	VI	1421
1356	OBEP011465274	SILVA	Fano	Ca. Electrothrix communis	VI	1516
1357	OBEP011465864	SILVA	Fano	Ca. Electrothrix aarhusiensis	VI	1516
1358	OBEP011465890	SILVA	Fano	Ca. Electrothrix communis	VI	1496
1359	OBEP011467720	SILVA	Fano	Ca. Electrothrix communis	VI	1516
1360	OBEP011467974	SILVA	Fano	Ca. Electrothrix aarhusiensis	VI	1514
1361	OBEP011468366	SILVA	Fano	Ca. Electrothrix communis	VI	1408
1362	OBEP011468693	SILVA	Fano	Ca. Electrothrix aarhusiensis	VI	1505
1363	OBEP011468736	SILVA	Fano	OBRS01813650	VI	1516
1364	OBEP011469413	SILVA	Fano	Ca. Electrothrix communis	VI	1492
1365	OBEP011469815	SILVA	Fano	Ca. Electrothrix communis	VI	1502
1366	OBEP011469818	SILVA	Fano	Ca. Electrothrix aarhusiensis	VI	1504
1367	OBEP011469861	SILVA	Fano	Ca. Electrothrix communis	VI	1516
1368	OBEP011470366	SILVA	Fano	Ca. Electrothrix rattekaaiensis	VI	1371
1369	OBEP011470429	SILVA	Fano	OBEP011479329	VI	1516
1370	OBEP011470535	SILVA	Fano	Ca. Electrothrix aarhusiensis	VI	1516
1371	OBEP011470554	SILVA	Fano	Ca. Electrothrix aarhusiensis	VI	1503
1372	OBEP011470670	SILVA	Fano	Ca. Electrothrix aarhusiensis	VI	1509
1373	OBEP011470990	SILVA	Fano	Ca. Electrothrix communis	VI	1502
1374	OBEP011471227	SILVA	Fano	Ca. Electrothrix communis	VI	1486
1375	OBEP011471248	SILVA	Fano	Ca. Electrothrix communis	VI	1516
1376	OBEP011471328	SILVA	Fano	OBAT01037143	VI	1516
1377	OBEP011471334	SILVA	Fano	Ca. Electrothrix communis	VI	1404
1378	OBEP011471396	SILVA	Fano	Ca. Electrothrix rattekaaiensis	VI	1388
1379	OBEP011471719	SILVA	Fano	Ca. Electrothrix communis	VI	1443
1380	OBEP011471905	SILVA	Fano	Ca. Electrothrix communis	VI	1514
1381	OBEP011472048	SILVA	Fano	OBRS01813650	VI	1514
1382	OBEP011472103	SILVA	Fano	Ca. Electrothrix communis	VI	1516
1383	OBEP011472226	SILVA	Fano	OBRS01813650	VI	1516
1384	OBEP011472548	SILVA	Fano	Ca. Electrothrix communis	VI	1515
1385	OBEP011472999	SILVA	Fano	Ca. Electrothrix communis	VI	1516
1386	OBEP011473489	SILVA	Fano	Ca. Electrothrix aarhusiensis	VI	1513
1387	OBEP011474315	SILVA	Fano	Ca. Electrothrix communis	VI	1505
1388	OBEP011474439	SILVA	Fano	OBRS01813650	VI	1514
1389	OBEP011474844	SILVA	Fano	OBRS01813650	VI	1513
1390	OBEP011474946	SILVA	Fano	Ca. Electrothrix communis	VI	1408
1391	OBEP011475042	SILVA	Fano	Ca. Electrothrix communis	VI	1494
1392	OBEP011475097	SILVA	Fano	Ca. Electrothrix aarhusiensis	VI	1516
1393	OBEP011475159	SILVA	Fano	Ca. Electrothrix aarhusiensis	VI	1516
1394	OBEP011475764	SILVA	Fano	Ca. Electrothrix communis	VI	1406
1395	OBEP011475909	SILVA	Fano	OBEP011479329	VI	1436
1396	OBEP011475945	SILVA	Fano	Ca. Electrothrix communis	VI	1343
1397	OBEP011476433	SILVA	Fano	Ca. Electrothrix aarhusiensis	VI	1506
1398	OBEP011476491	SILVA	Fano	Ca. Electrothrix communis	VI	1343
1399	OBEP011476551	SILVA	Fano	Ca. Electrothrix communis	VI	1250
1400	OBEP011476597	SILVA	Fano	Ca. Electrothrix aarhusiensis	VI	1444
1401	OBEP011477067	SILVA	Fano	Ca. Electrothrix communis	VI	1516
1402	OBEP011477389	SILVA	Fano	Ca. Electrothrix communis	VI	1503
1403	OBEP011477686	SILVA	Fano	Ca. Electrothrix rattekaaiensis	VI	1516
1404	OBEP011478208	SILVA	Fano	Ca. Electrothrix rattekaaiensis	VI	1516
1405	OBEP011478460	SILVA	Fano	Ca. Electrothrix aarhusiensis	VI	1516
1406	OBEP011478555	SILVA	Fano	OBEP011479329	VI	1516
1407	OBEP011479225	SILVA	Fano	Ca. Electrothrix communis	VI	1516
1408	OBEP011479329	SILVA	Fano	OBEP011479329	VI	1516
1409	OBEP011479631	SILVA	Fano	Ca. Electrothrix communis	VI	1515
1410	OBEP011479790	SILVA	Fano	Ca. Electrothrix communis	VI	1410
1411	OBEP011480188	SILVA	Fano	Ca. Electrothrix communis	VI	1515
1412	OBEP011480199	SILVA	Fano	Ca. Electrothrix communis	VI	1406
1413	OBEP011481119	SILVA	Fano	OBEP011479329	VI	1516
1414	OBEP011481568	SILVA	Fano	Ca. Electrothrix communis	VI	1327
1415	OBEP011481759	SILVA	Fano	Ca. Electrothrix communis	VI	1306
1416	OBEP011481787	SILVA	Fano	Ca. Electrothrix communis	VI	1516
1417	OBEP011482255	SILVA	Fano	Ca. Electrothrix communis	VI	1367
1418	OBEP011482557	SILVA	Fano	Ca. Electrothrix communis	VI	1442
1419	OBEP011482818	SILVA	Fano	Ca. Electrothrix aarhusiensis	VI	1446
1420	OBEP011483982	SILVA	Fano	Ca. Electrothrix aarhusiensis	VI	1516
1421	OBEP011484162	SILVA	Fano	Ca. Electrothrix communis	VI	1516
1422	OBEP011484191	SILVA	Fano	Ca. Electrothrix aarhusiensis	VI	1477
1423	OBEP011484243	SILVA	Fano	Ca. Electrothrix aarhusiensis	VI	1515
1424	OBEP011484523	SILVA	Fano	Ca. Electrothrix communis	VI	1506
1425	OBEP011484929	SILVA	Fano	Ca. Electrothrix communis	VI	1245
1426	OBEP011484940	SILVA	Fano	Ca. Electrothrix communis	VI	1516
1427	OBEP011484991	SILVA	Fano	Ca. Electrothrix communis	VI	1398
1428	OBEP011485408	SILVA	Fano	Ca. Electrothrix communis	VI	1405
1429	OBEP011485781	SILVA	Fano	Ca. Electrothrix communis	VI	1464
1430	OBEP011486242	SILVA	Fano	Ca. Electrothrix communis	VI	1516
1431	OBEP011486405	SILVA	Fano	OBRS01813650	VI	1392
1432	OBEP011486437	SILVA	Fano	Ca. Electrothrix communis	VI	1505
1433	OBEP011486539	SILVA	Fano	Ca. Electrothrix aarhusiensis	VI	1421
1434	OBEP011486745	SILVA	Fano	OBEP011479329	VI	1516
1435	OBEP011486756	SILVA	Fano	Ca. Electrothrix communis	VI	1505
1436	OBEP011487239	SILVA	Fano	OBEP011479329	VI	1516
1437	OBEP011487299	SILVA	Fano	Ca. Electrothrix communis	VI	1516
1438	OBEP011487440	SILVA	Fano	OBRS01813650	VI	1516
1439	OBEP011487965	SILVA	Fano	Ca. Electrothrix aarhusiensis	VI	1506
1440	OBEP011488083	SILVA	Fano	Ca. Electrothrix communis	VI	1504
1441	OBEP011488248	SILVA	Fano	Ca. Electrothrix communis	VI	1506
1442	OBEP011488378	SILVA	Fano	Ca. Electrothrix communis	VI	1378
1443	OBEP011488380	SILVA	Fano	Ca. Electrothrix communis	VI	1514
1444	OBEP011489041	SILVA	Fano	Ca. Electrothrix communis	VI	1517
1445	OBEP011489307	SILVA	Fano	Ca. Electrothrix aarhusiensis	VI	1513
1446	OBEP011489326	SILVA	Fano	Ca. Electrothrix communis	VI	1406
1447	OBEP011489343	SILVA	Fano	Ca. Electrothrix communis	VI	1439
1448	OBEP011489840	SILVA	Fano	Ca. Electrothrix communis	VI	1514
1449	OBEP011489914	SILVA	Fano	Ca. Electrothrix communis	VI	1516
1450	OBEP011489934	SILVA	Fano	OBRS01813650	VI	1467
1451	OBEP011489953	SILVA	Fano	OBRS01813650	VI	1516
1452	OBEP011489988	SILVA	Fano	Ca. Electrothrix aarhusiensis	VI	1397
1453	OBEP011490098	SILVA	Fano	Ca. Electrothrix communis	VI	1515
1454	OBEP011490244	SILVA	Fano	Ca. Electrothrix aarhusiensis	VI	1514
1455	OBEP011490594	SILVA	Fano	Ca. Electrothrix communis	VI	1515
1456	OBEP011490931	SILVA	Fano	Ca. Electrothrix communis	VI	1515
1457	OBEP011491432	SILVA	Fano	Ca. Electrothrix communis	VI	1448
1458	OBEP011491501	SILVA	Fano	OBRS01813650	VI	1320
1459	OBEP011491608	SILVA	Fano	OBRS01813650	VI	1514
1460	OBEP011491904	SILVA	Fano	Ca. Electrothrix communis	VI	1516
1461	OBEP011491984	SILVA	Fano	Ca. Electrothrix communis	VI	1516
1462	OBEP011492138	SILVA	Fano	Ca. Electrothrix communis	VI	1516
1463	OBEP011492174	SILVA	Fano	Ca. Electrothrix communis	VI	1516
1464	OBEP011492383	SILVA	Fano	Ca. Electrothrix communis	VI	1516
1465	OBEP011492555	SILVA	Fano	Ca. Electrothrix communis	VI	1496
1466	OBEP011493073	SILVA	Fano	Ca. Electrothrix communis	VI	1516
1467	OBEP011493078	SILVA	Fano	Ca. Electrothrix communis	VI	1516
1468	OBEP011493472	SILVA	Fano	Ca. Electrothrix aarhusiensis	VI	1428
1469	OBEP011493694	SILVA	Fano	Ca. Electrothrix communis	VI	1506
1470	OBEP011494130	SILVA	Fano	Ca. Electrothrix aarhusiensis	VI	1516
1471	OBEP011494406	SILVA	Fano	Ca. Electrothrix aarhusiensis	VI	1331
1472	OBEP011494437	SILVA	Fano	Ca. Electrothrix communis	VI	1515
1473	OBEP011494862	SILVA	Fano	Ca. Electrothrix communis	VI	1516
1474	OBEP011494893	SILVA	Fano	Ca. Electrothrix aarhusiensis	VI	1515
1475	OBEP011494934	SILVA	Fano	Ca. Electrothrix rattekaaiensis	VI	1409
1476	OBEP011495028	SILVA	Fano	Ca. Electrothrix communis	VI	1516
1477	OBEP011495181	SILVA	Fano	OBEP011479329	VI	1516
1478	OBEP011495194	SILVA	Fano	Ca. Electrothrix communis	VI	1443
1479	OBEP011495401	SILVA	Fano	Ca. Electrothrix communis	VI	1513
1480	OBRS01007764	SILVA	Ulvedybet, Limfjorden	Ca. Electrothrix communis	VI	1516
1481	OBRS01010369	SILVA	Ulvedybet, Limfjorden	Ca. Electrothrix communis	VI	1516
1482	OBRS01013618	SILVA	Ulvedybet, Limfjorden	Ca. Electrothrix marina	VI	1516
1483	OBRS01031821	SILVA	Ulvedybet, Limfjorden	Ca. Electrothrix marina	VI	1516
1484	OBRS01034686	SILVA	Ulvedybet, Limfjorden	Ca. Electrothrix marina	VI	1516
1485	OBRS01034846	SILVA	Ulvedybet, Limfjorden	Ca. Electrothrix communis	VI	1516
1486	OBRS01036401	SILVA	Ulvedybet, Limfjorden	Ca. Electrothrix communis	VI	1516
1487	OBRS01039552	SILVA	Ulvedybet, Limfjorden	Ca. Electrothrix marina	VI	1516
1488	OBRS01060758	SILVA	Ulvedybet, Limfjorden	Ca. Electrothrix marina	VI	1516
1489	OBRS01067009	SILVA	Ulvedybet, Limfjorden	Ca. Electrothrix marina	VI	1516
1490	OBRS01076885	SILVA	Ulvedybet, Limfjorden	Ca. Electrothrix marina	VI	1516
1491	OBRS01085792	SILVA	Ulvedybet, Limfjorden	Ca. Electrothrix marina	VI	1516
1492	OBRS01092227	SILVA	Ulvedybet, Limfjorden	Ca. Electrothrix communis	VI	1516
1493	OBRS01096030	SILVA	Ulvedybet, Limfjorden	Ca. Electrothrix marina	VI	1516
1494	OBRS01099835	SILVA	Ulvedybet, Limfjorden	Ca. Electrothrix communis	VI	1514
1495	OBRS01100240	SILVA	Ulvedybet, Limfjorden	Ca. Electrothrix communis	VI	1516
1496	OBRS01419531	SILVA	Limfjorden, Aalborg	OBRS01419531	VI	1514
1497	OBRS01453242	SILVA	Limfjorden, Aalborg	OBEP010114380	VI	1516
1498	OBRS01673845	SILVA	Aalborg University campus	Ca. Electronema nielsenii	I	1513
1499	OBRS01677766	SILVA	Dokkedal	Ca. Electrothrix aarhusiensis	VI	1516
1500	OBRS01677923	SILVA	Dokkedal	Ca. Electrothrix aarhusiensis	VI	1516
1501	OBRS01678199	SILVA	Dokkedal	Ca. Electrothrix aarhusiensis	VI	1516
1502	OBRS01678784	SILVA	Dokkedal	Ca. Electrothrix aarhusiensis	VI	1516
1503	OBRS01678819	SILVA	Dokkedal	Ca. Electrothrix aarhusiensis	VI	1516
1504	OBRS01679148	SILVA	Dokkedal	Ca. Electrothrix aarhusiensis	VI	1516
1505	OBRS01679496	SILVA	Dokkedal	Ca. Electrothrix aarhusiensis	VI	1514
1506	OBRS01679672	SILVA	Dokkedal	Ca. Electrothrix aarhusiensis	VI	1517
1507	OBRS01679682	SILVA	Dokkedal	Ca. Electrothrix aarhusiensis	VI	1515
1508	OBRS01679932	SILVA	Dokkedal	Ca. Electrothrix aarhusiensis	VI	1516
1509	OBRS01680146	SILVA	Dokkedal	Ca. Electrothrix aarhusiensis	VI	1515
1510	OBRS01680276	SILVA	Dokkedal	Ca. Electrothrix aarhusiensis	VI	1516
1511	OBRS01680598	SILVA	Dokkedal	Ca. Electrothrix aarhusiensis	VI	1515
1512	OBRS01680660	SILVA	Dokkedal	Ca. Electrothrix aarhusiensis	VI	1516
1513	OBRS01680830	SILVA	Dokkedal	Ca. Electrothrix aarhusiensis	VI	1515
1514	OBRS01680997	SILVA	Dokkedal	Ca. Electrothrix aarhusiensis	VI	1516
1515	OBRS01681042	SILVA	Dokkedal	Ca. Electrothrix aarhusiensis	VI	1516
1516	OBRS01681116	SILVA	Dokkedal	Ca. Electrothrix aarhusiensis	VI	1516
1517	OBRS01681233	SILVA	Dokkedal	Ca. Electrothrix aarhusiensis	VI	1516
1518	OBRS01681497	SILVA	Dokkedal	Ca. Electrothrix aarhusiensis	VI	1516
1519	OBRS01681843	SILVA	Dokkedal	Ca. Electrothrix aarhusiensis	VI	1516
1520	OBRS01682473	SILVA	Dokkedal	Ca. Electrothrix aarhusiensis	VI	1516
1521	OBRS01682644	SILVA	Dokkedal	Ca. Electrothrix aarhusiensis	VI	1515
1522	OBRS01682754	SILVA	Dokkedal	Ca. Electrothrix aarhusiensis	VI	1516
1523	OBRS01682795	SILVA	Dokkedal	Ca. Electrothrix aarhusiensis	VI	1516
1524	OBRS01683720	SILVA	Dokkedal	Ca. Electrothrix aarhusiensis	VI	1516
1525	OBRS01684004	SILVA	Dokkedal	Ca. Electrothrix aarhusiensis	VI	1514
1526	OBRS01684298	SILVA	Dokkedal	Ca. Electrothrix aarhusiensis	VI	1516
1527	OBRS01684311	SILVA	Dokkedal	Ca. Electrothrix aarhusiensis	VI	1515
1528	OBRS01684333	SILVA	Dokkedal	Ca. Electrothrix aarhusiensis	VI	1516
1529	OBRS01684369	SILVA	Dokkedal	Ca. Electrothrix aarhusiensis	VI	1516
1530	OBRS01684621	SILVA	Dokkedal	Ca. Electrothrix aarhusiensis	VI	1514
1531	OBRS01684823	SILVA	Dokkedal	Ca. Electrothrix aarhusiensis	VI	1516
1532	OBRS01684824	SILVA	Dokkedal	Ca. Electrothrix aarhusiensis	VI	1516
1533	OBRS01684844	SILVA	Dokkedal	Ca. Electrothrix aarhusiensis	VI	1516
1534	OBRS01685101	SILVA	Dokkedal	Ca. Electrothrix aarhusiensis	VI	1514
1535	OBRS01685121	SILVA	Dokkedal	Ca. Electrothrix aarhusiensis	VI	1515
1536	OBRS01685260	SILVA	Dokkedal	Ca. Electrothrix communis	VI	1515
1537	OBRS01685302	SILVA	Dokkedal	Ca. Electrothrix aarhusiensis	VI	1516
1538	OBRS01685442	SILVA	Dokkedal	Ca. Electrothrix aarhusiensis	VI	1516
1539	OBRS01685745	SILVA	Dokkedal	Ca. Electrothrix aarhusiensis	VI	1516
1540	OBRS01686085	SILVA	Dokkedal	Ca. Electrothrix aarhusiensis	VI	1516
1541	OBRS01686135	SILVA	Dokkedal	Ca. Electrothrix aarhusiensis	VI	1515
1542	OBRS01686190	SILVA	Dokkedal	Ca. Electrothrix aarhusiensis	VI	1516
1543	OBRS01686385	SILVA	Dokkedal	Ca. Electrothrix aarhusiensis	VI	1516
1544	OBRS01686455	SILVA	Dokkedal	Ca. Electrothrix aarhusiensis	VI	1516
1545	OBRS01686635	SILVA	Dokkedal	Ca. Electrothrix aarhusiensis	VI	1516
1546	OBRS01686727	SILVA	Dokkedal	Ca. Electrothrix aarhusiensis	VI	1515
1547	OBRS01687397	SILVA	Dokkedal	OBEP011364101	VI	1515
1548	OBRS01687470	SILVA	Dokkedal	Ca. Electrothrix aarhusiensis	VI	1516
1549	OBRS01687593	SILVA	Dokkedal	Ca. Electrothrix aarhusiensis	VI	1514
1550	OBRS01687681	SILVA	Dokkedal	Ca. Electrothrix aarhusiensis	VI	1515
1551	OBRS01687994	SILVA	Dokkedal	Ca. Electrothrix aarhusiensis	VI	1512
1552	OBRS01688253	SILVA	Dokkedal	Ca. Electrothrix aarhusiensis	VI	1516
1553	OBRS01688339	SILVA	Dokkedal	Ca. Electrothrix aarhusiensis	VI	1515
1554	OBRS01688869	SILVA	Dokkedal	Ca. Electrothrix aarhusiensis	VI	1516
1555	OBRS01689346	SILVA	Dokkedal	Ca. Electrothrix aarhusiensis	VI	1516
1556	OBRS01689492	SILVA	Dokkedal	Ca. Electrothrix aarhusiensis	VI	1516
1557	OBRS01689807	SILVA	Dokkedal	Ca. Electrothrix aarhusiensis	VI	1515
1558	OBRS01689852	SILVA	Dokkedal	Ca. Electrothrix aarhusiensis	VI	1516
1559	OBRS01690005	SILVA	Dokkedal	Ca. Electrothrix aarhusiensis	VI	1516
1560	OBRS01690217	SILVA	Dokkedal	Ca. Electrothrix aarhusiensis	VI	1516
1561	OBRS01690290	SILVA	Dokkedal	Ca. Electrothrix aarhusiensis	VI	1516
1562	OBRS01690806	SILVA	Dokkedal	Ca. Electrothrix aarhusiensis	VI	1516
1563	OBRS01690850	SILVA	Dokkedal	Ca. Electrothrix aarhusiensis	VI	1516
1564	OBRS01691213	SILVA	Dokkedal	Ca. Electrothrix aarhusiensis	VI	1515
1565	OBRS01691370	SILVA	Dokkedal	Ca. Electrothrix aarhusiensis	VI	1516
1566	OBRS01692254	SILVA	Dokkedal	Ca. Electrothrix aarhusiensis	VI	1516
1567	OBRS01692571	SILVA	Dokkedal	Ca. Electrothrix aarhusiensis	VI	1516
1568	OBRS01692639	SILVA	Dokkedal	Ca. Electrothrix aarhusiensis	VI	1516
1569	OBRS01692660	SILVA	Dokkedal	Ca. Electrothrix aarhusiensis	VI	1516
1570	OBRS01692877	SILVA	Dokkedal	Ca. Electrothrix aarhusiensis	VI	1516
1571	OBRS01693057	SILVA	Dokkedal	Ca. Electrothrix aarhusiensis	VI	1516
1572	OBRS01693117	SILVA	Dokkedal	Ca. Electrothrix aarhusiensis	VI	1516
1573	OBRS01693584	SILVA	Dokkedal	Ca. Electrothrix aarhusiensis	VI	1516
1574	OBRS01693675	SILVA	Dokkedal	Ca. Electrothrix aarhusiensis	VI	1515
1575	OBRS01693842	SILVA	Dokkedal	Ca. Electrothrix aarhusiensis	VI	1514
1576	OBRS01693851	SILVA	Dokkedal	Ca. Electrothrix aarhusiensis	VI	1516
1577	OBRS01694187	SILVA	Dokkedal	Ca. Electrothrix aarhusiensis	VI	1516
1578	OBRS01694484	SILVA	Dokkedal	Ca. Electrothrix aarhusiensis	VI	1515
1579	OBRS01694699	SILVA	Dokkedal	Ca. Electrothrix aarhusiensis	VI	1516
1580	OBRS01694884	SILVA	Dokkedal	Ca. Electrothrix aarhusiensis	VI	1515
1581	OBRS01695393	SILVA	Dokkedal	Ca. Electrothrix aarhusiensis	VI	1516
1582	OBRS01695746	SILVA	Dokkedal	Ca. Electrothrix aarhusiensis	VI	1515
1583	OBRS01695800	SILVA	Dokkedal	Ca. Electrothrix aarhusiensis	VI	1516
1584	OBRS01696105	SILVA	Dokkedal	Ca. Electrothrix aarhusiensis	VI	1516
1585	OBRS01696403	SILVA	Dokkedal	Ca. Electrothrix aarhusiensis	VI	1516
1586	OBRS01696564	SILVA	Dokkedal	Ca. Electrothrix aarhusiensis	VI	1516
1587	OBRS01696735	SILVA	Dokkedal	Ca. Electrothrix aarhusiensis	VI	1516
1588	OBRS01697139	SILVA	Dokkedal	Ca. Electrothrix aarhusiensis	VI	1515
1589	OBRS01697185	SILVA	Dokkedal	Ca. Electrothrix aarhusiensis	VI	1516
1590	OBRS01697598	SILVA	Dokkedal	Ca. Electrothrix aarhusiensis	VI	1516
1591	OBRS01697620	SILVA	Dokkedal	Ca. Electrothrix aarhusiensis	VI	1515
1592	OBRS01697662	SILVA	Dokkedal	Ca. Electrothrix aarhusiensis	VI	1516
1593	OBRS01698856	SILVA	Dokkedal	Ca. Electrothrix aarhusiensis	VI	1515
1594	OBRS01698968	SILVA	Dokkedal	Ca. Electrothrix aarhusiensis	VI	1516
1595	OBRS01699089	SILVA	Dokkedal	Ca. Electrothrix aarhusiensis	VI	1516
1596	OBRS01699112	SILVA	Dokkedal	Ca. Electrothrix aarhusiensis	VI	1516
1597	OBRS01699576	SILVA	Dokkedal	Ca. Electrothrix aarhusiensis	VI	1515
1598	OBRS01699582	SILVA	Dokkedal	Ca. Electrothrix aarhusiensis	VI	1516
1599	OBRS01699609	SILVA	Dokkedal	Ca. Electrothrix aarhusiensis	VI	1514
1600	OBRS01699897	SILVA	Dokkedal	Ca. Electrothrix aarhusiensis	VI	1514
1601	OBRS01700005	SILVA	Dokkedal	Ca. Electrothrix aarhusiensis	VI	1516
1602	OBRS01700194	SILVA	Dokkedal	Ca. Electrothrix aarhusiensis	VI	1516
1603	OBRS01700276	SILVA	Dokkedal	Ca. Electrothrix aarhusiensis	VI	1516
1604	OBRS01701059	SILVA	Dokkedal	Ca. Electrothrix aarhusiensis	VI	1515
1605	OBRS01701209	SILVA	Dokkedal	Ca. Electrothrix aarhusiensis	VI	1516
1606	OBRS01701213	SILVA	Dokkedal	Ca. Electrothrix aarhusiensis	VI	1516
1607	OBRS01701321	SILVA	Dokkedal	Ca. Electrothrix aarhusiensis	VI	1516
1608	OBRS01701341	SILVA	Dokkedal	Ca. Electrothrix aarhusiensis	VI	1516
1609	OBRS01701724	SILVA	Dokkedal	Ca. Electrothrix aarhusiensis	VI	1516
1610	OBRS01701789	SILVA	Dokkedal	Ca. Electrothrix aarhusiensis	VI	1516
1611	OBRS01701854	SILVA	Dokkedal	Ca. Electrothrix aarhusiensis	VI	1516
1612	OBRS01702536	SILVA	Dokkedal	Ca. Electrothrix aarhusiensis	VI	1516
1613	OBRS01702932	SILVA	Dokkedal	Ca. Electrothrix aarhusiensis	VI	1516
1614	OBRS01703353	SILVA	Dokkedal	Ca. Electrothrix aarhusiensis	VI	1516
1615	OBRS01703551	SILVA	Dokkedal	Ca. Electrothrix aarhusiensis	VI	1516
1616	OBRS01703768	SILVA	Dokkedal	Ca. Electrothrix aarhusiensis	VI	1515
1617	OBRS01703807	SILVA	Dokkedal	Ca. Electrothrix aarhusiensis	VI	1516
1618	OBRS01704072	SILVA	Dokkedal	Ca. Electrothrix aarhusiensis	VI	1513
1619	OBRS01704694	SILVA	Dokkedal	Ca. Electrothrix aarhusiensis	VI	1516
1620	OBRS01704703	SILVA	Dokkedal	Ca. Electrothrix aarhusiensis	VI	1515
1621	OBRS01704735	SILVA	Dokkedal	Ca. Electrothrix aarhusiensis	VI	1515
1622	OBRS01704900	SILVA	Dokkedal	Ca. Electrothrix aarhusiensis	VI	1516
1623	OBRS01705074	SILVA	Dokkedal	Ca. Electrothrix aarhusiensis	VI	1516
1624	OBRS01705163	SILVA	Dokkedal	Ca. Electrothrix aarhusiensis	VI	1514
1625	OBRS01705536	SILVA	Dokkedal	Ca. Electrothrix sp. AR5	VI	1515
1626	OBRS01705556	SILVA	Dokkedal	Ca. Electrothrix aarhusiensis	VI	1515
1627	OBRS01705685	SILVA	Dokkedal	Ca. Electrothrix aarhusiensis	VI	1516
1628	OBRS01705803	SILVA	Dokkedal	Ca. Electrothrix aarhusiensis	VI	1516
1629	OBRS01705908	SILVA	Dokkedal	Ca. Electrothrix aarhusiensis	VI	1516
1630	OBRS01705995	SILVA	Dokkedal	Ca. Electrothrix aarhusiensis	VI	1516
1631	OBRS01706917	SILVA	Mariagerfjord	Ca. Electrothrix aarhusiensis	VI	1516
1632	OBRS01706929	SILVA	Mariagerfjord	Ca. Electrothrix aarhusiensis	VI	1516
1633	OBRS01707038	SILVA	Mariagerfjord	Ca. Electrothrix aarhusiensis	VI	1514
1634	OBRS01708250	SILVA	Mariagerfjord	Ca. Electrothrix aarhusiensis	VI	1516
1635	OBRS01708903	SILVA	Mariagerfjord	Ca. Electrothrix aarhusiensis	VI	1513
1636	OBRS01709616	SILVA	Mariagerfjord	Ca. Electrothrix aarhusiensis	VI	1516
1637	OBRS01710911	SILVA	Mariagerfjord	OBEP011284502	VI	1515
1638	OBRS01711665	SILVA	Mariagerfjord	Ca. Electrothrix aarhusiensis	VI	1514
1639	OBRS01711829	SILVA	Mariagerfjord	Ca. Electrothrix aarhusiensis	VI	1516
1640	OBRS01711966	SILVA	Mariagerfjord	Ca. Electrothrix sp. AR5	VI	1514
1641	OBRS01712222	SILVA	Mariagerfjord	Ca. Electrothrix aarhusiensis	VI	1516
1642	OBRS01712694	SILVA	Mariagerfjord	Ca. Electrothrix aarhusiensis	VI	1515
1643	OBRS01714217	SILVA	Mariagerfjord	Ca. Electrothrix aarhusiensis	VI	1516
1644	OBRS01714323	SILVA	Mariagerfjord	Ca. Electrothrix aarhusiensis	VI	1516
1645	OBRS01714328	SILVA	Mariagerfjord	Ca. Electrothrix aarhusiensis	VI	1514
1646	OBRS01715155	SILVA	Mariagerfjord	Ca. Electrothrix communis	VI	1514
1647	OBRS01715163	SILVA	Mariagerfjord	Ca. Electrothrix aarhusiensis	VI	1515
1648	OBRS01715180	SILVA	Mariagerfjord	Ca. Electrothrix aarhusiensis	VI	1516
1649	OBRS01715575	SILVA	Mariagerfjord	Ca. Electrothrix aarhusiensis	VI	1516
1650	OBRS01715657	SILVA	Mariagerfjord	Ca. Electrothrix aarhusiensis	VI	1516
1651	OBRS01715904	SILVA	Mariagerfjord	Ca. Electrothrix aarhusiensis	VI	1516
1652	OBRS01716004	SILVA	Mariagerfjord	Ca. Electrothrix communis	VI	1516
1653	OBRS01716115	SILVA	Mariagerfjord	Ca. Electrothrix aarhusiensis	VI	1516
1654	OBRS01716397	SILVA	Mariagerfjord	Ca. Electrothrix aarhusiensis	VI	1516
1655	OBRS01717690	SILVA	Mariagerfjord	Ca. Electrothrix aarhusiensis	VI	1516
1656	OBRS01717806	SILVA	Mariagerfjord	Ca. Electrothrix aarhusiensis	VI	1516
1657	OBRS01718875	SILVA	Mariagerfjord	Ca. Electrothrix aarhusiensis	VI	1516
1658	OBRS01719053	SILVA	Mariagerfjord	Ca. Electrothrix aarhusiensis	VI	1516
1659	OBRS01719062	SILVA	Mariagerfjord	Ca. Electrothrix aarhusiensis	VI	1516
1660	OBRS01719282	SILVA	Mariagerfjord	Ca. Electrothrix communis	VI	1516
1661	OBRS01719369	SILVA	Mariagerfjord	Ca. Electrothrix aarhusiensis	VI	1514
1662	OBRS01720219	SILVA	Mariagerfjord	Ca. Electrothrix aarhusiensis	VI	1516
1663	OBRS01720634	SILVA	Mariagerfjord	Ca. Electrothrix aarhusiensis	VI	1515
1664	OBRS01721295	SILVA	Mariagerfjord	Ca. Electrothrix communis	VI	1516
1665	OBRS01722311	SILVA	Mariagerfjord	Ca. Electrothrix aarhusiensis	VI	1515
1666	OBRS01722779	SILVA	Mariagerfjord	Ca. Electrothrix aarhusiensis	VI	1515
1667	OBRS01722857	SILVA	Mariagerfjord	Ca. Electrothrix aarhusiensis	VI	1516
1668	OBRS01722913	SILVA	Mariagerfjord	Ca. Electrothrix aarhusiensis	VI	1516
1669	OBRS01723669	SILVA	Mariagerfjord	Ca. Electrothrix aarhusiensis	VI	1515
1670	OBRS01723958	SILVA	Mariagerfjord	Ca. Electrothrix aarhusiensis	VI	1516
1671	OBRS01724258	SILVA	Mariagerfjord	Ca. Electrothrix aarhusiensis	VI	1514
1672	OBRS01724490	SILVA	Mariagerfjord	Ca. Electrothrix communis	VI	1516
1673	OBRS01724508	SILVA	Mariagerfjord	Ca. Electrothrix sp. AR5	VI	1516
1674	OBRS01725223	SILVA	Mariagerfjord	Ca. Electrothrix aarhusiensis	VI	1514
1675	OBRS01725541	SILVA	Mariagerfjord	Ca. Electrothrix aarhusiensis	VI	1515
1676	OBRS01725701	SILVA	Mariagerfjord	Ca. Electrothrix aarhusiensis	VI	1516
1677	OBRS01726418	SILVA	Mariagerfjord	Ca. Electrothrix aarhusiensis	VI	1516
1678	OBRS01727616	SILVA	Mariagerfjord	Ca. Electrothrix aarhusiensis	VI	1516
1679	OBRS01727877	SILVA	Mariagerfjord	Ca. Electrothrix aarhusiensis	VI	1516
1680	OBRS01729250	SILVA	Mariagerfjord	Ca. Electrothrix aarhusiensis	VI	1516
1681	OBRS01729510	SILVA	Mariagerfjord	Ca. Electrothrix communis	VI	1515
1682	OBRS01729670	SILVA	Mariagerfjord	Ca. Electrothrix aarhusiensis	VI	1515
1683	OBRS01729723	SILVA	Mariagerfjord	Ca. Electrothrix sp. AR5	VI	1516
1684	OBRS01729732	SILVA	Mariagerfjord	Ca. Electrothrix communis	VI	1516
1685	OBRS01730043	SILVA	Mariagerfjord	Ca. Electrothrix aarhusiensis	VI	1515
1686	OBRS01730256	SILVA	Mariagerfjord	Ca. Electrothrix aarhusiensis	VI	1515
1687	OBRS01730546	SILVA	Mariagerfjord	Ca. Electrothrix communis	VI	1516
1688	OBRS01730705	SILVA	Mariagerfjord	Ca. Electrothrix aarhusiensis	VI	1516
1689	OBRS01730782	SILVA	Mariagerfjord	Ca. Electrothrix aarhusiensis	VI	1516
1690	OBRS01731969	SILVA	Mariagerfjord	Ca. Electrothrix aarhusiensis	VI	1516
1691	OBRS01732046	SILVA	Mariagerfjord	Ca. Electrothrix aarhusiensis	VI	1516
1692	OBRS01732286	SILVA	Mariagerfjord	Ca. Electrothrix communis	VI	1515
1693	OBRS01733108	SILVA	Mariagerfjord	Ca. Electrothrix aarhusiensis	VI	1516
1694	OBRS01733382	SILVA	Mariagerfjord	Ca. Electrothrix aarhusiensis	VI	1514
1695	OBRS01734081	SILVA	Mariagerfjord	Ca. Electrothrix aarhusiensis	VI	1515
1696	OBRS01735850	SILVA	Mariagerfjord	Ca. Electrothrix aarhusiensis	VI	1516
1697	OBRS01736632	SILVA	Mariagerfjord	Ca. Electrothrix aarhusiensis	VI	1516
1698	OBRS01737827	SILVA	Mariagerfjord	Ca. Electrothrix aarhusiensis	VI	1514
1699	OBRS01738549	SILVA	Mariagerfjord	Ca. Electrothrix aarhusiensis	VI	1512
1700	OBRS01739159	SILVA	Mariagerfjord	Ca. Electrothrix aarhusiensis	VI	1516
1701	OBRS01739345	SILVA	Mariagerfjord	Ca. Electrothrix communis	VI	1516
1702	OBRS01739414	SILVA	Mariagerfjord	Ca. Electrothrix aarhusiensis	VI	1515
1703	OBRS01740117	SILVA	Mariagerfjord	Ca. Electrothrix aarhusiensis	VI	1516
1704	OBRS01740448	SILVA	Mariagerfjord	Ca. Electrothrix aarhusiensis	VI	1516
1705	OBRS01740881	SILVA	Mariagerfjord	Ca. Electrothrix aarhusiensis	VI	1516
1706	OBRS01743745	SILVA	Mariagerfjord	Ca. Electrothrix aarhusiensis	VI	1516
1707	OBRS01743751	SILVA	Mariagerfjord	Ca. Electrothrix aarhusiensis	VI	1516
1708	OBRS01743836	SILVA	Mariagerfjord	Ca. Electrothrix aarhusiensis	VI	1516
1709	OBRS01743905	SILVA	Mariagerfjord	Ca. Electrothrix aarhusiensis	VI	1515
1710	OBRS01744584	SILVA	Mariagerfjord	Ca. Electrothrix aarhusiensis	VI	1516
1711	OBRS01745112	SILVA	Mariagerfjord	Ca. Electrothrix aarhusiensis	VI	1515
1712	OBRS01745271	SILVA	Mariagerfjord	Ca. Electrothrix aarhusiensis	VI	1516
1713	OBRS01745795	SILVA	Mariagerfjord	Ca. Electrothrix communis	VI	1516
1714	OBRS01745975	SILVA	Mariagerfjord	Ca. Electrothrix aarhusiensis	VI	1516
1715	OBRS01746684	SILVA	Mariagerfjord	Ca. Electrothrix aarhusiensis	VI	1516
1716	OBRS01746713	SILVA	Mariagerfjord	Ca. Electrothrix sp. AR5	VI	1514
1717	OBRS01746934	SILVA	Mariagerfjord	Ca. Electrothrix aarhusiensis	VI	1516
1718	OBRS01748013	SILVA	Mariagerfjord	Ca. Electrothrix aarhusiensis	VI	1516
1719	OBRS01748357	SILVA	Mariagerfjord	Ca. Electrothrix aarhusiensis	VI	1514
1720	OBRS01748671	SILVA	Mariagerfjord	Ca. Electrothrix aarhusiensis	VI	1517
1721	OBRS01748894	SILVA	Mariagerfjord	Ca. Electrothrix aarhusiensis	VI	1516
1722	OBRS01749167	SILVA	Mariagerfjord	Ca. Electrothrix aarhusiensis	VI	1516
1723	OBRS01749242	SILVA	Mariagerfjord	Ca. Electrothrix aarhusiensis	VI	1516
1724	OBRS01749927	SILVA	Mariagerfjord	Ca. Electrothrix aarhusiensis	VI	1513
1725	OBRS01750107	SILVA	Mariagerfjord	Ca. Electrothrix aarhusiensis	VI	1516
1726	OBRS01751109	SILVA	Mariagerfjord	Ca. Electrothrix aarhusiensis	VI	1515
1727	OBRS01751197	SILVA	Mariagerfjord	Ca. Electrothrix aarhusiensis	VI	1516
1728	OBRS01751444	SILVA	Mariagerfjord	Ca. Electrothrix communis	VI	1516
1729	OBRS01751862	SILVA	Mariagerfjord	Ca. Electrothrix aarhusiensis	VI	1515
1730	OBRS01752367	SILVA	Mariagerfjord	Ca. Electrothrix communis	VI	1516
1731	OBRS01752907	SILVA	Mariagerfjord	Ca. Electrothrix communis	VI	1516
1732	OBRS01754446	SILVA	Mariagerfjord	Ca. Electrothrix aarhusiensis	VI	1516
1733	OBRS01754526	SILVA	Mariagerfjord	Ca. Electrothrix aarhusiensis	VI	1516
1734	OBRS01754813	SILVA	Mariagerfjord	Ca. Electrothrix aarhusiensis	VI	1516
1735	OBRS01755313	SILVA	Mariagerfjord	Ca. Electrothrix aarhusiensis	VI	1516
1736	OBRS01755340	SILVA	Mariagerfjord	Ca. Electrothrix communis	VI	1516
1737	OBRS01755668	SILVA	Mariagerfjord	Ca. Electrothrix aarhusiensis	VI	1515
1738	OBRS01756150	SILVA	Mariagerfjord	Ca. Electrothrix aarhusiensis	VI	1516
1739	OBRS01756156	SILVA	Mariagerfjord	Ca. Electrothrix aarhusiensis	VI	1516
1740	OBRS01756265	SILVA	Mariagerfjord	Ca. Electrothrix communis	VI	1516
1741	OBRS01756438	SILVA	Mariagerfjord	Ca. Electrothrix aarhusiensis	VI	1514
1742	OBRS01756843	SILVA	Mariagerfjord	Ca. Electrothrix aarhusiensis	VI	1516
1743	OBRS01757087	SILVA	Mariagerfjord	Ca. Electrothrix aarhusiensis	VI	1515
1744	OBRS01757258	SILVA	Mariagerfjord	Ca. Electrothrix aarhusiensis	VI	1516
1745	OBRS01757306	SILVA	Mariagerfjord	Ca. Electrothrix aarhusiensis	VI	1516
1746	OBRS01757872	SILVA	Mariagerfjord	Ca. Electrothrix aarhusiensis	VI	1516
1747	OBRS01758393	SILVA	Mariagerfjord	Ca. Electrothrix aarhusiensis	VI	1516
1748	OBRS01758618	SILVA	Mariagerfjord	Ca. Electrothrix aarhusiensis	VI	1516
1749	OBRS01758781	SILVA	Mariagerfjord	Ca. Electrothrix aarhusiensis	VI	1515
1750	OBRS01758853	SILVA	Mariagerfjord	Ca. Electrothrix aarhusiensis	VI	1516
1751	OBRS01758954	SILVA	Mariagerfjord	Ca. Electrothrix aarhusiensis	VI	1516
1752	OBRS01760287	SILVA	Mariagerfjord	Ca. Electrothrix aarhusiensis	VI	1516
1753	OBRS01760352	SILVA	Mariagerfjord	Ca. Electrothrix communis	VI	1516
1754	OBRS01760520	SILVA	Mariagerfjord	Ca. Electrothrix aarhusiensis	VI	1516
1755	OBRS01761249	SILVA	Mariagerfjord	Ca. Electrothrix aarhusiensis	VI	1516
1756	OBRS01761649	SILVA	Mariagerfjord	Ca. Electrothrix aarhusiensis	VI	1515
1757	OBRS01761846	SILVA	Mariagerfjord	Ca. Electrothrix communis	VI	1514
1758	OBRS01761962	SILVA	Mariagerfjord	Ca. Electrothrix aarhusiensis	VI	1516
1759	OBRS01762917	SILVA	Mariagerfjord	Ca. Electrothrix aarhusiensis	VI	1515
1760	OBRS01762944	SILVA	Mariagerfjord	Ca. Electrothrix aarhusiensis	VI	1516
1761	OBRS01763475	SILVA	Mariagerfjord	Ca. Electrothrix communis	VI	1516
1762	OBRS01763741	SILVA	Mariagerfjord	Ca. Electrothrix aarhusiensis	VI	1516
1763	OBRS01764843	SILVA	Mariagerfjord	Ca. Electrothrix aarhusiensis	VI	1514
1764	OBRS01765737	SILVA	Mariagerfjord	Ca. Electrothrix aarhusiensis	VI	1514
1765	OBRS01766607	SILVA	Mariagerfjord	Ca. Electrothrix aarhusiensis	VI	1516
1766	OBRS01766876	SILVA	Mariagerfjord	Ca. Electrothrix aarhusiensis	VI	1514
1767	OBRS01767125	SILVA	Mariagerfjord	Ca. Electrothrix aarhusiensis	VI	1515
1768	OBRS01767146	SILVA	Mariagerfjord	Ca. Electrothrix aarhusiensis	VI	1516
1769	OBRS01767294	SILVA	Mariagerfjord	Ca. Electrothrix aarhusiensis	VI	1513
1770	OBRS01767900	SILVA	Mariagerfjord	Ca. Electrothrix aarhusiensis	VI	1516
1771	OBRS01768240	SILVA	Mariagerfjord	Ca. Electrothrix sp. AR5	VI	1516
1772	OBRS01768269	SILVA	Mariagerfjord	Ca. Electrothrix sp. AR5	VI	1516
1773	OBRS01768320	SILVA	Mariagerfjord	Ca. Electrothrix aarhusiensis	VI	1516
1774	OBRS01768611	SILVA	Mariagerfjord	Ca. Electrothrix aarhusiensis	VI	1514
1775	OBRS01768825	SILVA	Mariagerfjord	Ca. Electrothrix aarhusiensis	VI	1516
1776	OBRS01768881	SILVA	Mariagerfjord	Ca. Electrothrix aarhusiensis	VI	1514
1777	OBRS01769358	SILVA	Mariagerfjord	Ca. Electrothrix aarhusiensis	VI	1515
1778	OBRS01769856	SILVA	Mariagerfjord	Ca. Electrothrix aarhusiensis	VI	1516
1779	OBRS01770562	SILVA	Mariagerfjord	Ca. Electrothrix aarhusiensis	VI	1515
1780	OBRS01770718	SILVA	Mariagerfjord	Ca. Electrothrix aarhusiensis	VI	1516
1781	OBRS01770966	SILVA	Mariagerfjord	Ca. Electrothrix aarhusiensis	VI	1516
1782	OBRS01771049	SILVA	Mariagerfjord	Ca. Electrothrix aarhusiensis	VI	1516
1783	OBRS01771160	SILVA	Mariagerfjord	Ca. Electrothrix aarhusiensis	VI	1516
1784	OBRS01771823	SILVA	Mariagerfjord	Ca. Electrothrix aarhusiensis	VI	1516
1785	OBRS01771891	SILVA	Mariagerfjord	Ca. Electrothrix aarhusiensis	VI	1516
1786	OBRS01771892	SILVA	Mariagerfjord	Ca. Electrothrix aarhusiensis	VI	1516
1787	OBRS01772164	SILVA	Mariagerfjord	Ca. Electrothrix communis	VI	1516
1788	OBRS01772236	SILVA	Mariagerfjord	Ca. Electrothrix aarhusiensis	VI	1515
1789	OBRS01773172	SILVA	Mariagerfjord	Ca. Electrothrix aarhusiensis	VI	1516
1790	OBRS01774047	SILVA	Mariagerfjord	Ca. Electrothrix aarhusiensis	VI	1516
1791	OBRS01774178	SILVA	Mariagerfjord	Ca. Electrothrix communis	VI	1516
1792	OBRS01774579	SILVA	Mariagerfjord	Ca. Electrothrix aarhusiensis	VI	1515
1793	OBRS01774657	SILVA	Mariagerfjord	Ca. Electrothrix aarhusiensis	VI	1516
1794	OBRS01774814	SILVA	Mariagerfjord	Ca. Electrothrix aarhusiensis	VI	1516
1795	OBRS01774904	SILVA	Mariagerfjord	Ca. Electrothrix aarhusiensis	VI	1516
1796	OBRS01775097	SILVA	Mariagerfjord	Ca. Electrothrix aarhusiensis	VI	1516
1797	OBRS01775127	SILVA	Mariagerfjord	Ca. Electrothrix aarhusiensis	VI	1516
1798	OBRS01796573	SILVA	Fano	Ca. Electrothrix communis	VI	1516
1799	OBRS01796901	SILVA	Fano	Ca. Electrothrix communis	VI	1515
1800	OBRS01797731	SILVA	Fano	Ca. Electrothrix communis	VI	1516
1801	OBRS01798362	SILVA	Fano	Ca. Electrothrix communis	VI	1516
1802	OBRS01798515	SILVA	Fano	OBEP011479329	VI	1516
1803	OBRS01798536	SILVA	Fano	Ca. Electrothrix communis	VI	1516
1804	OBRS01798747	SILVA	Fano	OBRS01813650	VI	1516
1805	OBRS01798980	SILVA	Fano	Ca. Electrothrix communis	VI	1515
1806	OBRS01799012	SILVA	Fano	OBEP010114380	VI	1516
1807	OBRS01799013	SILVA	Fano	Ca. Electrothrix aarhusiensis	VI	1514
1808	OBRS01799892	SILVA	Fano	Ca. Electrothrix communis	VI	1513
1809	OBRS01799923	SILVA	Fano	OBRS01813650	VI	1515
1810	OBRS01800203	SILVA	Fano	Ca. Electrothrix communis	VI	1516
1811	OBRS01800989	SILVA	Fano	Ca. Electrothrix communis	VI	1516
1812	OBRS01800995	SILVA	Fano	Ca. Electrothrix communis	VI	1516
1813	OBRS01801124	SILVA	Fano	Ca. Electrothrix communis	VI	1517
1814	OBRS01801284	SILVA	Fano	Ca. Electrothrix communis	VI	1516
1815	OBRS01801449	SILVA	Fano	OBEP011479329	VI	1516
1816	OBRS01801665	SILVA	Fano	OBEP011479329	VI	1515
1817	OBRS01802125	SILVA	Fano	Ca. Electrothrix communis	VI	1516
1818	OBRS01803589	SILVA	Fano	Ca. Electrothrix communis	VI	1516
1819	OBRS01803837	SILVA	Fano	Ca. Electrothrix aarhusiensis	VI	1516
1820	OBRS01804653	SILVA	Fano	Ca. Electrothrix communis	VI	1516
1821	OBRS01804756	SILVA	Fano	Ca. Electrothrix aarhusiensis	VI	1514
1822	OBRS01805103	SILVA	Fano	OBRS01813650	VI	1516
1823	OBRS01805629	SILVA	Fano	Ca. Electrothrix communis	VI	1516
1824	OBRS01805880	SILVA	Fano	OBEP011479329	VI	1516
1825	OBRS01805921	SILVA	Fano	Ca. Electrothrix aarhusiensis	VI	1516
1826	OBRS01805987	SILVA	Fano	Ca. Electrothrix aarhusiensis	VI	1509
1827	OBRS01806247	SILVA	Fano	Ca. Electrothrix communis	VI	1516
1828	OBRS01806288	SILVA	Fano	OBAT01037143	VI	1516
1829	OBRS01806555	SILVA	Fano	Ca. Electrothrix communis	VI	1514
1830	OBRS01806624	SILVA	Fano	OBRS01813650	VI	1514
1831	OBRS01806653	SILVA	Fano	Ca. Electrothrix communis	VI	1516
1832	OBRS01806703	SILVA	Fano	OBRS01813650	VI	1516
1833	OBRS01806856	SILVA	Fano	Ca. Electrothrix communis	VI	1515
1834	OBRS01807068	SILVA	Fano	Ca. Electrothrix communis	VI	1516
1835	OBRS01807691	SILVA	Fano	OBRS01813650	VI	1514
1836	OBRS01807882	SILVA	Fano	OBRS01813650	VI	1513
1837	OBRS01808004	SILVA	Fano	Ca. Electrothrix aarhusiensis	VI	1516
1838	OBRS01808042	SILVA	Fano	Ca. Electrothrix aarhusiensis	VI	1516
1839	OBRS01808900	SILVA	Fano	Ca. Electrothrix communis	VI	1516
1840	OBRS01809187	SILVA	Fano	Ca. Electrothrix rattekaaiensis	VI	1516
1841	OBRS01809432	SILVA	Fano	Ca. Electrothrix rattekaaiensis	VI	1516
1842	OBRS01809545	SILVA	Fano	Ca. Electrothrix aarhusiensis	VI	1516
1843	OBRS01809586	SILVA	Fano	OBEP011479329	VI	1516
1844	OBRS01809882	SILVA	Fano	Ca. Electrothrix communis	VI	1516
1845	OBRS01809923	SILVA	Fano	OBEP011479329	VI	1516
1846	OBRS01810068	SILVA	Fano	Ca. Electrothrix communis	VI	1515
1847	OBRS01810328	SILVA	Fano	Ca. Electrothrix communis	VI	1515
1848	OBRS01810770	SILVA	Fano	OBEP011479329	VI	1516
1849	OBRS01811072	SILVA	Fano	Ca. Electrothrix communis	VI	1516
1850	OBRS01812103	SILVA	Fano	Ca. Electrothrix aarhusiensis	VI	1516
1851	OBRS01812182	SILVA	Fano	Ca. Electrothrix communis	VI	1516
1852	OBRS01812221	SILVA	Fano	Ca. Electrothrix aarhusiensis	VI	1515
1853	OBRS01812551	SILVA	Fano	Ca. Electrothrix communis	VI	1516
1854	OBRS01813127	SILVA	Fano	Ca. Electrothrix communis	VI	1516
1855	OBRS01813358	SILVA	Fano	OBEP011479329	VI	1516
1856	OBRS01813576	SILVA	Fano	OBEP011479329	VI	1516
1857	OBRS01813594	SILVA	Fano	Ca. Electrothrix communis	VI	1516
1858	OBRS01813650	SILVA	Fano	OBRS01813650	VI	1516
1859	OBRS01814048	SILVA	Fano	Ca. Electrothrix communis	VI	1514
1860	OBRS01814328	SILVA	Fano	Ca. Electrothrix communis	VI	1517
1861	OBRS01814442	SILVA	Fano	Ca. Electrothrix aarhusiensis	VI	1513
1862	OBRS01814675	SILVA	Fano	Ca. Electrothrix communis	VI	1514
1863	OBRS01814711	SILVA	Fano	Ca. Electrothrix communis	VI	1516
1864	OBRS01814734	SILVA	Fano	OBRS01813650	VI	1516
1865	OBRS01814796	SILVA	Fano	Ca. Electrothrix communis	VI	1515
1866	OBRS01814864	SILVA	Fano	Ca. Electrothrix aarhusiensis	VI	1514
1867	OBRS01815036	SILVA	Fano	Ca. Electrothrix communis	VI	1515
1868	OBRS01815179	SILVA	Fano	Ca. Electrothrix communis	VI	1515
1869	OBRS01815477	SILVA	Fano	OBRS01813650	VI	1514
1870	OBRS01815607	SILVA	Fano	Ca. Electrothrix communis	VI	1516
1871	OBRS01815643	SILVA	Fano	Ca. Electrothrix communis	VI	1516
1872	OBRS01815712	SILVA	Fano	Ca. Electrothrix communis	VI	1516
1873	OBRS01815730	SILVA	Fano	Ca. Electrothrix communis	VI	1516
1874	OBRS01815826	SILVA	Fano	Ca. Electrothrix communis	VI	1516
1875	OBRS01816119	SILVA	Fano	Ca. Electrothrix communis	VI	1516
1876	OBRS01816121	SILVA	Fano	Ca. Electrothrix communis	VI	1516
1877	OBRS01816559	SILVA	Fano	Ca. Electrothrix aarhusiensis	VI	1516
1878	OBRS01816676	SILVA	Fano	Ca. Electrothrix communis	VI	1515
1879	OBRS01816849	SILVA	Fano	Ca. Electrothrix communis	VI	1516
1880	OBRS01816862	SILVA	Fano	Ca. Electrothrix aarhusiensis	VI	1515
1881	OBRS01816913	SILVA	Fano	Ca. Electrothrix communis	VI	1516
1882	OBRS01816967	SILVA	Fano	OBEP011479329	VI	1516
1883	OBRS01817052	SILVA	Fano	Ca. Electrothrix communis	VI	1513
1884	OP646468	Literature: Geelhoed et al., 2023	Rattekaai	Ca. Electrothrix gigas	VI	1376
1885	OR244071	Literature: Yang et al., 2023	Ballona wetland, LA	GA_A6_ccs1517	I	1321
1886	OR244072	Literature: Yang et al., 2023	Ballona wetland, LA	GA_A6_ccs1517	I	1321
1887	OR244073	Literature: Yang et al., 2023	Ballona wetland, LA	GA_A6_ccs1517	I	1321
1888	OR244074	Literature: Yang et al., 2023	Ballona wetland, LA	GA_A6_ccs1517	I	1321
1889	OR244075	Literature: Yang et al., 2023	Ballona wetland, LA	MH252182	I	1319
1890	OR244076	Literature: Yang et al., 2023	Ballona wetland, LA	MH252182	I	1321
1891	OR244077	Literature: Yang et al., 2023	Ballona wetland, LA	MH252182	I	1321
1892	OR244078	Literature: Yang et al., 2023	Ballona wetland, LA	MH252182	I	1321
1893	OR244081	Literature: Yang et al., 2023	Ballona wetland, LA	GA_A6_ccs1517	I	1321
1894	OR244082	Literature: Yang et al., 2023	Ballona wetland, LA	MH252182	I	1321
1895	OR244084	Literature: Yang et al., 2023	Ballona wetland, LA	GA_A6_ccs1517	I	1322
1896	OR244085	Literature: Yang et al., 2023	Ballona wetland, LA	GA_A6_ccs1517	I	1321
1897	OR244086	Literature: Yang et al., 2023	Ballona wetland, LA	GA_A6_ccs1517	I	1321
1898	OR244088	Literature: Yang et al., 2023	Ballona wetland, LA	GA_A6_ccs1517	I	1321
1899	OR244089	Literature: Yang et al., 2023	Ballona wetland, LA	GA_A6_ccs1517	I	1321
1900	OR244090	Literature: Yang et al., 2023	Ballona wetland, LA	GA_A6_ccs1517	I	1321
1901	OR244091	Literature: Yang et al., 2023	Ballona wetland, LA	GA_A6_ccs1517	I	1321
1902	OR244092	Literature: Yang et al., 2023	Ballona wetland, LA	MH252182	I	1321
1903	OR244093	Literature: Yang et al., 2023	Ballona wetland, LA	GA_A6_ccs1517	I	1321
1904	OR244095	Literature: Yang et al., 2023	Ballona wetland, LA	GA_A6_ccs1517	I	1321
1905	OR244096	Literature: Yang et al., 2023	Ballona wetland, LA	GA_A6_ccs1517	I	1321
1906	OR244097	Literature: Yang et al., 2023	Ballona wetland, LA	MH252182	I	1321
1907	OR244098	Literature: Yang et al., 2023	Ballona wetland, LA	GA_A6_ccs1517	I	1321
1908	OR244099	Literature: Yang et al., 2023	Ballona wetland, LA	GA_A6_ccs1517	I	1321
1909	OR244111	Literature: Yang et al., 2023	Mungi Lake	FQ658831	I	1321
1910	OR244122	Literature: Yang et al., 2023	Mungi Lake	FQ658831	I	1321
1911	OR244131	Literature: Yang et al., 2023	Mungi Lake	FQ658831	I	1321
1912	PP554486	NCBI	n.a.	PP554486	I	1477
1913	PP554487	NCBI	n.a.	FQ658831	I	1477
1914	PP554488	NCBI	n.a.	MH252182	I	1477
1915	PP554489	NCBI	n.a.	MH252182	I	1477
1916	PP554490	NCBI	n.a.	Ca. Electronema palustre	I	1477
1917	PP554491	NCBI	n.a.	MT640316	I	1477
1918	PRJNA454675_AR1	Literature: Geelhoed et al., 2023	St. 130, North Sea	Ca. Electrothrix sp. AR1	VI	1546
1919	PRJNA454675_AR3	Literature: Geelhoed et al., 2023	St. 130, North Sea	AR3	V	1546
1920	PRJNA454675_AR4	Literature: Geelhoed et al., 2023	St. 130, North Sea	AR4	IV	1546
1921	PRJNA454675_AR5	Literature: Geelhoed et al., 2023	St. 130, North Sea	Ca. Electrothrix sp. AR5	VI	1546
1922	PRJNA454675_AS4	Literature: Geelhoed et al., 2023	Oude Bietenhaven, Eastern Scheldt	Ca. Electrothrix gigas	VI	1546
1923	PRJNA454675_AS5	Literature: Geelhoed et al., 2023	Oude Bietenhaven, Eastern Scheldt	Ca. Electrothrix gigas	VI	1546
1924	PRJNA454675_ATG1	Literature: Geelhoed et al., 2023	Lake Grevelingen	Ca. Electrothrix sp. ATG1_2	VI	1555
1925	PRJNA454675_ATG2	Literature: Geelhoed et al., 2023	Lake Grevelingen	Ca. Electrothrix sp. ATG1_2	VI	1546
1926	PRJNA454675_AU1	Literature: Geelhoed et al., 2023	Rattekaai	Ca. Electrothrix gigas	VI	1546
1927	PRJNA454675_AU2	Literature: Geelhoed et al., 2023	Rattekaai	Ca. Electrothrix gigas	VI	1546
1928	PRJNA454675_AU3	Literature: Geelhoed et al., 2023	Rattekaai	Ca. Electrothrix gigas	VI	1546
1929	PRJNA454675_AU4	Literature: Geelhoed et al., 2023	Rattekaai	Ca. Electrothrix gigas	VI	1546
1930	PRJNA454675_AU5	Literature: Geelhoed et al., 2023	Rattekaai	Ca. Electrothrix gigas	VI	1546
1931	PRJNA454675_AUS1	Literature: Geelhoed et al., 2023	Yarra river	Ca. Electrothrix sp. AUS1_2	VI	1555
1932	PRJNA454675_AUS2	Literature: Geelhoed et al., 2023	Yarra river	Ca. Electrothrix sp. AUS1_2	VI	1272
1933	PRJNA454675_AUS3	Literature: Geelhoed et al., 2023	Yarra river	Ca. Electrothrix gigas	VI	1546
1934	PRJNA454675_Ca. Electrothrix sp. AUS4	Literature: Geelhoed et al., 2023	Yarra river	Ca. Electrothrix sp. AUS4	VI	1546
1935	PRJNA454675_AW1	Literature: Geelhoed et al., 2023	Mokbaai	Ca. Electrothrix gigas	VI	1546
1936	PRJNA454675_AW2	Literature: Geelhoed et al., 2023	Mokbaai	Ca. Electrothrix gigas	VI	1546
1937	PRJNA454675_AW3	Literature: Geelhoed et al., 2023	Mokbaai	Ca. Electrothrix gigas	VI	1546
1938	PRJNA454675_AW4	Literature: Geelhoed et al., 2023	Mokbaai	Ca. Electrothrix gigas	VI	1546
1939	PRJNA454675_AW5	Literature: Geelhoed et al., 2023	Mokbaai	Ca. Electrothrix gigas	VI	1546
1940	PRJNA454675_AX1	Literature: Geelhoed et al., 2023	De Cocksdorp, Texel	Ca. Electrothrix gigas	VI	1546
1941	PRJNA454675_AX2	Literature: Geelhoed et al., 2023	De Cocksdorp, Texel	Ca. Electrothrix gigas	VI	1546
1942	PRJNA454675_AX4	Literature: Geelhoed et al., 2023	De Cocksdorp, Texel	Ca. Electrothrix gigas	VI	1546
1943	PRJNA454675_AX5	Literature: Geelhoed et al., 2023	De Cocksdorp, Texel	Ca. Electrothrix aarhusiensis	VI	1546
1944	PRJNA454675_Ca. Electrothrix sp. EH2	Literature: Geelhoed et al., 2023	Elkhorn Slough	Ca. Electrothrix sp. EH2	VI	1546
1945	PRJNA454675_GM3	Literature: Geelhoed et al., 2023	Gulf of Mexico (Geelhoed)	Ca. Electrothrix sp. GM3_4	VI	1546
1946	PRJNA454675_GM4	Literature: Geelhoed et al., 2023	Gulf of Mexico (Geelhoed)	Ca. Electrothrix sp. GM3_4	VI	1546
1947	PRJNA454675_LOE1	Literature: Geelhoed et al., 2023	Loegten strand, Central Jutland	Ca. Electrothrix gigas	VI	1546
1948	PRJNA454675_Ca. Electrothrix sp. LOE2	Literature: Geelhoed et al., 2023	Loegten strand, Central Jutland	Ca. Electrothrix sp. LOE2	VI	1546
1949	PRJNA454675_LOE4	Literature: Geelhoed et al., 2023	Loegten strand, Central Jutland	Ca. Electrothrix gigas	VI	1546
1950	PRJNA454675_LOE5	Literature: Geelhoed et al., 2023	Loegten strand, Central Jutland	Ca. Electrothrix gigas	VI	1546
1951	PRJNA454675_MAN1	Literature: Geelhoed et al., 2023	Western Port, Victoria	MAN1_4	VI	1546
1952	PRJNA454675_MAN2	Literature: Geelhoed et al., 2023	Western Port, Victoria	MAN1_4	VI	1546
1953	S1	This study	Ostend harbour	OH	VI	939
1954	S11	This study	Ostend harbour	OH	VI	901
1955	S2	This study	Ostend harbour	OH	VI	936
1956	S3	This study	Ostend harbour	OH	VI	947
1957	S4	This study	Ostend harbour	OH	VI	947
1958	S5	This study	Ostend harbour	OH	VI	946
1959	S6	This study	Ostend harbour	OH	VI	894
1960	PQ214940 / SI1	This study	Magazzolo river, Sicily S=2.4	SI1	II	1502
1961	Si1.2-2	This study	Magazzolo river, Sicily S=2.4	SI1	II	1215
1962	Si1.2-3	This study	Magazzolo river, Sicily S=2.4	SI2	III	1464
1963	Si1.2-4	This study	Magazzolo river, Sicily S=2.4	SI1	II	1508
1964	Si1.2-5	This study	Magazzolo river, Sicily S=2.4	SI1	II	1223
1965	Si1.2-6	This study	Magazzolo river, Sicily S=2.4	SI1	II	878
1966	Si1.3-1	This study	Magazzolo river, Sicily S=2.4	SI1	II	1221
1967	Si1.3-7	This study	Magazzolo river, Sicily S=2.4	SI1	II	946
1968	Si1.3-8	This study	Magazzolo river, Sicily S=2.4	SI1	II	1221
1969	Si1.3-9	This study	Magazzolo river, Sicily S=2.4	SI2	III	934
1970	PQ214941 / SI3	This study	Magazzolo river, Sicily S=2.4	SI3	VI	1485
1971	Si1.5-S3	This study	Magazzolo river, Sicily S=2.4	SI3	VI	1474
1972	T1	This study	Ostend harbour	RK	VI	894
1973	T13	This study	Ostend harbour	OH	VI	894
1974	T3	This study	Ostend harbour	OH	VI	846
1975	T6	This study	Ostend harbour	OH	VI	947
1976	T7	This study	Ostend harbour	OH	VI	856
1977	T9	This study	Ostend harbour	OH	VI	922
1978	YR10	This study	Yarra River	YR	II	1018
1979	YR11	This study	Yarra River	YR	II	1020
1980	YR12	This study	Yarra River	YR	II	1505
1981	PQ214942 / YR	This study	Yarra River	YR	II	1505
1982	YR14	This study	Yarra River	YR	II	1018
1983	YR16	This study	Yarra River	YR	II	1018
1984	YR17	This study	Yarra River	YR	II	1018
1985	YR18	This study	Yarra River	YR	II	1019
1986	YR19	This study	Yarra River	YR	II	1017
1987	YR20	This study	Yarra River	YR	II	1018
1988	YR21	This study	Yarra River	YR	II	1018

## Sheet: Table S3
Supplementary Table 3
Accession numbers and IDs of species-level cable bacteria clades
Accession number	Species-level clade	# sequences in clade (≥1200 bp)
GCA_022765785	Ca. Electrothrix sp. AR1	4
GCA_022765765	AR3	1
GCA_022765725	AR4	15
GCA_022765745	Ca. Electrothrix sp. AR5	25
GCA_022765965	Ca. Electrothrix sp. ATG1_2	5
GCA_022765865	Ca. Electrothrix sp. AUS1_2	1
GCA_022765925	Ca. Electrothrix sp. AUS4	2
PQ214937	EB2	8
GCA_022765845	Ca. Electrothrix sp. EH2	1
GCA_942492785	Ca. Electronema aureum	5
GCA_942493095	Ca. Electronema halotolerans	1
KP728462	Ca. Electronema nielsenii	17
KP728463	Ca. Electronema palustre	9
KR912338	Ca. Electrothrix aarhusiensis	1083
KR912339	Ca. Electrothrix communis	257
GCA_022766045	Ca. Electrothrix gigas	43
KR912349	Ca. Electrothrix japonica	1
GCA_942492895	Ca. Electrothrix laxa	2
KR912340	Ca. Electrothrix marina	46
CP138355	Ca. Electrothrix scaldis/aestuarii	5
GCA_032595675	Ca. Electrothrix rattekaaiensis	8
GCA_022765805	Ca. Electrothrix sp. GM3_4	4
PQ214938	RK1	11
GCA_022766145	Ca. Electrothrix sp. LOE2	2
GCA_022766125	Ca. Electrothrix sp. MAN1_4	2
GQ249497	GQ249497	1
AB013265	AB013265	1
AF420334	AF420334	1
AF420335	AF420335	1
AF354166	AF354166	2
AJ535236	AJ535236	17
AM745212	AM745212	1
AM745158	AM745158	4
AY355305	AY355305	1
AY531563	AY531563	1
AY531586	AY531586	1
KX172796	KX172796	1
FJ905682	FJ905682	1
FM179901	FM179901	2
FN554128	FN554128	2
FN396640	FN396640	2
FQ658831	FQ658831	5
FR852964	FR852964	1
GU208270	GU208270	1
GU369922	GU369922	1
GU369890	GU369890	1
GU302491	GU302491	6
JN256011	JN256011	1
JN662182	JN662182	2
JN662193	JN662193	1
KC682614	KC682614	1
KF440309	KF440309	1
KF616796	KF616796	1
KM356313	KM356313	1
KR814200	KR814200	1
KR814201	KR814201	2
KR814208	KR814208	2
KR814256	KR814256	1
KR814247	KR814247	1
KR814272	KR814272	1
KR814176	KR814176	2
KR814182	KR814182	3
LC431992	LC431992	1
MH252182	MH252182	25
MH252188	MH252188	1
MH252166	MH252166	1
MN947611	MN947611	1
MN947615	MN947615	1
MT640316	MT640316	7
MH252179	MH252179	24
JF268345	JF268345	3
JF268391	JF268391	1
PRJNA726381	GA_A6_ccs1517	18
KF141578	KF141578	2
KF771006	KF771006	1
OBRS01813650	OBRS01813650	30
OBEP011364101	OBEP011364101	4
OBEP011284502	OBEP011284502	2
OBEP010014765	OBEP010014765	1
OBAT01037143	OBAT01037143	3
OBRS01419531	OBRS01419531	3
OBEP011479329	OBEP011479329	21
OBEP010114380	OBEP010114380	11
PQ214940	SI1	14
PQ214939	SI2	5
PQ214941	SI3	2
AM176869	AM176869	1
PQ214942	YR	11
PP554486	PP554486	1
CP147990	Ca. Electrothrix antwerpensis	1
Accession number	Species-level clade	# sequences in clade (800 - 1199 bp)
PQ216432	IO8	5
FR798146	FR798146	2
JX091071	JX091071	1
HE972194	HE972194	1
JX091072	JX091072	1
PQ216433	OH	12
MH356751	Shahe	1
AB374690	site1_53	1

## Sheet: Table S4
Supplementary Table 4
Accession numbers of cable bacteria and related Desulfobulbales sequences used in phylogenetic tree (Figure 1)
#	Accession	Species	Cluster	Site # (see Tab. S4)	Sequence length [bp]
1	GCA_022766045	Ca. Electrothrix gigas AX1	VI	12, 36, 49, 57, 67, 68, 92	1546
2	JF268345	JF268345	VI	35	1516
3	GCA_022766125	Ca. Electrothrix sp. MAN1_4	VI	91	1546
4	KF741578	KF741578	VI	17, 26, 78	1516
5	PQ214937	EB2	VI	16, 17	1494
6	GCA_022765965	Ca. Electrothrix sp. ATG1	VI	45, 62, 76	1555
7	OBAT01037143	OBAT01037143	VI	20	1516
8	GQ249497	GQ249497	VI	8	1518
9	PQ214938	RK1	VI	66, 68	1496
10	GCA_022765845	Ca. Electrothrix sp. EH2	VI	19	1546
11	GCA_022765865	Ca. Electrothrix sp. AUS1_2	VI	92	1555
12	CP147990	Ca. Electrothrix antwerpensis GW3-4	VI	68	1555
13	KR912349	Ca. Electrothrix japonica TB	VI	80	1546
14	OBEP011284502	OBEP011284502	VI	55	1515
15	KR912338	Ca. Electrothrix aarhusiensis MCF	VI	3, 12, 13, 36, 51, 55	1546
16	OBEP011364101	OBEP011364101	VI	13, 55	1511
17	GCA_022765805	Ca. Electrothrix sp. GM3_4	VI	15, 27, 76	1546
18	GCA_942492895	Ca. Electrothrix laxa HOU-scMAG	VI	13, 36	1555
19	OBRS01813650	OBRS01813650	VI	20, 55, 82	1516
20	KX172796	KX172796	VI	30	1448
21	GCA_022765745	Ca. Electrothrix sp. AR5	VI	2, 13, 55, 76	1546
22	GCA_032595675	Ca. Electrothrix rattekaaiensis Rat3	VI	20, 68	1555
23	KR912339	Ca. Electrothrix communis A1	VI	2, 3, 20, 47, 48, 68, 76, 82	1546
24	GCA_022765785	Ca. Electrothrix sp. AR1	VI	76	1546
25	OBEP011479329	OBEP011479329	VI	20	1516
26	OBEP010114380	OBEP010114380	VI	13, 20, 47, 55, 82	1430
27	GCA_022766145	Ca. Electrothrix sp. LOE2	VI	49, 68	1546
28	OBRS01419531	OBRS01419531	VI	47, 55	1514
29	AM176869	AM176869	VI	21	1479
30	PQ214941	SI3	VI	52	1485
31	KF771006	KF771006	VI	48	1285
32	GCA_022765925	Ca. Electrothrix sp. AUS4	VI	92	1546
33	OBEP010014765	OBEP010014765	VI	82	1231
34	CP138355	Ca. Electrothrix scaldis GW3-3	VI	17, 68	1555
35	KR912340	Ca. Electrothrix marina A2	VI	3, 82	1546
36	AJ535236	AJ535236	V	11, 18, 29, 31, 37, 42, 58	1521
37	GU369922	GU369922	V	86	1427
38	AM745212	AM745212	V	31	1492
39	FM179901	FM179901	V	32, 74	1424
40	AF354166	AF354166	V	18, 74	1519
41	FN396640	FN396640	V	74	1415
42	FJ905682	FJ905682	V	79, 87	1449
43	AM745158	AM745158	V	18, 31, 58, 73	1522
44	KR814176	KR814176	V	58	1523
45	KF616796	KF616796	V	37	1485
46	KF440309	KF440309	V	6	1416
47	FN554128	FN554128	V	50	1520
48	AB013265	AB013265	V	60	1523
49	KR814182	KR814182	V	58	1524
50	LC431992	LC431992	V	11	1521
51	KR814247	KR814247	V	58	1519
52	KR814272	KR814272	V	58	1520
53	KR814200	KR814200	V	58	1520
54	KR814201	KR814201	V	58	1515
55	AF420334	AF420334	V	23	1520
56	JN662193	JN662193	V	42	1393
57	AY531563	AY531563	V	69	1449
58	AY531586	AY531586	V	69	1526
59	GU302491	GU302491	V	37, 56, 58	1521
60	KM356313	KM356313	V	37	1481
61	AY355305	AY355305	V	69	1518
62	JN662182	JN662182	V	42	1395
63	AF420335	AF420335	V	23	1520
64	FR852964	FR852964	V	14	1522
65	GU369890	GU369890	V	86	1433
66	KC682614	KC682614	V	81	1518
67	JN256011	JN256011	V	58	1527
68	KR814256	KR814256	V	58, 64	1522
69	JF268391	JF268391	V	35	1517
70	GCA_022765765	AR3	V	76	1546
71	KR814208	KR814208	IV	56, 58	1519
72	GCA_022765725	AR4	IV	76	1546
73	PQ214939	SI2	III	52, 54	1492
74	GCA_942493095	Ca. Electronema halotolerans LOGT-cMAG	II	49	1554
75	PQ214942	YR	II	92	1505
76	PQ214940	SI1	II	52, 53, 54	1508
77	GU208270	GU208270	I	44	1522
78	FQ658831	FQ658831	I	10, 59	1372
79	KP728462	Ca. Electronema nielsenii F1	I	1, 22, 39, 90	1543
80	Ga0183576_12823	Ca. Electronema aureum GS	I	1, 85	1543
81	MN947615	MN947615	I	90	1477
82	KP728463	Ca. Electronema palustre F3	I	1, 22, 39, 90	1543
83	PP554486	PP554486	I	n.a.	1477
84	MT640316	MT640316	I	n.a.	1479
85	MH252166	MH252166	I	n.a.	1477
86	MH252182	MH252182	I	7, 90	1480
87	MN947611	MN947611	I	90	1477
88	PRJNA726381	GA_A6_ccs1517	I	7, 39	1517
89	MH252188	MH252188	I	n.a.	1477
90	MH252179	MH252179	I	n.a.	1478
91	CP021255	Desulfobulbus oralis HOT041ORNL			1554
92	GCA_016446285	Desulfobulbus oligotrophicus Prop6			1557
93	GCA_000186885	Desulfobulbus propionicus DSM2032			1555
94	GCA_000621145	Desulfobulbus elongatus DSM2908			1554
95	GCA_016918545	Desulfobulbus alkaliphilus DSM24258			1555
96	GCA_016919065	Desulfobulbus rhabdoformis DSM8777			1470
97	NR_025150	Desulfogranum mediterraneum 86FS1			1457
98	GCA_016918565	Desulfogranum marinum DSM2058			1554
99	GCA_000429945	Desulfogranum japonicum DSM18378			1485
100	LC596831	Desulfolithobacter dissulfuricans GF1			1561
101	GCA_900143695	Desulfopila aestuarii DSM18488			1469
102	GCA_000025945	Desulfotalea psychrophila LSv54			1543
103	CP003985	Desulfocapsa sulfexigens DSM10523			1557
104	AF118453	Desulforhopalus singaporensis DSM12130			1540
105	GCA_016918505	Desulforhopalus vacuolatus DSM9700			1537
106	GCA_019703855	Desulfomarina profundi KT2			1558
107	GCA_900130015	Desulfofustis glycolicus DSM9705			1557
108	GCA_016918515	Desulfoprunum benzoelyticum DSM28570			1556
109	589865	Desulfurivibrio alkaliphilus AHT2			1559
110	NR_075009	Geobacter sulfurreducens PCA			1556

## Sheet: Table S5
Supplementary Table 5
Metadata of 92 cable bacteria sites
#	Location	Country	Latitude_N	Longitude_E	Salinity	Salinity category	Habitat type	Habitat category	Water depth [m]	Sulfide concentration [μM]	Sulfide category (low: <10, medium: 10-500, high: >500 μM)	Clusters	# CB species	References (only oldest in dataset with available 16S sequences)
1	Aalborg University campus	Denmark	57.0154	9.9777		freshwater	artificial pond	lake	0.5			I	3	Karst et al., 2018
2	Aarhus Bay 1	Denmark	56.1056	10.4633	25	brackish/marine	bay	subtidal	22	150	medium	VI	6	Pfeffer et al., 2012
3	Aarhus Bay 2	Denmark	56.1389	10.2142	18	brackish	bay	subtidal	4					Trojan et al., 2016
4	Alat lake	Germany	47.5626	10.6398		freshwater	lake	lake	1	40	medium			Sachs et al., 2022
5	Alberta	Canada				freshwater	mixed grass prairie soils	terrestrial						Thompson et al., 2017 (unpubl.)
6	Amsterdam mud volcano, Mediterranean Sea		35.3339	-30.2717		marine	mud volcano	cold seep	2000			V	1	Kormas and Pachiadaki 2013
7	Ballona wetland, LA	USA	33.9708	-118.431		freshwater	freshwater marsh pond	lake	0.5			I	2	Yang et al., 2023
8	Bay of Cadiz	Spain	36.4747	-6.1785		marine	bay	subtidal				VI	1	Kochling et al., 2011
9	Cathedral Hill hydrothermal venting site, Guaymas Basin		27.0069	-111.243		marine	Gulf of California	hydrothermal vent	2010					Pjevac et al., 2014
10	Chambery, AREA compon	France	45.5788	5.80156		freshwater	constructed wetland	wetland	0.5			I	1	Martin et al., 2012
11	Chapopote, southern Gulf of Mexico		21.899	-93.437		marine	deep sea	asphalt volcano	3000			V	2	Wegener et al., 2019
12	De Cocksdorp, Texel	The Netherlands	53.1479	4.90117	30	marine	oyster reef	intertidal	0	>300	medium	VI	2	Geelhoed et al., 2023
13	Dokkedal	Denmark	56.9059	10.2692		brackish	shore	intertidal	0.5			VI	3	Karst et al., 2018
14	Dudley site, Juan de Fuca ridge		47.948	-129.099		marine	hydrothermal chimney	hydrothermal vent	2200			V	1	Biddle et al., 2011 (unpubl.)
15	Eastern equatorial Pacific, ODP site 1226		-3.095	-90.818		marine	deep sea	subtidal	3297			VI	1	Li, 2011
16	Ebro delta (ED10)	Spain	40.6364	0.74729	10	brackish	river delta	estuary	0.5			VI	1	This study
17	Ebro delta (ED33)	Spain	40.6401	0.73994	33	marine	river delta	estuary	0.5			VI	3	This study
18	Eel River Basin, CA	USA	40.6294	-124.306		marine	methane seep	cold seep	500			V	3	Orphan et al., 2001
19	Elkhorn Slough	USA	36.82	-121.74		brackish	salt marsh	intertidal	0.5			VI	1	Geelhoed et al., 2023
20	Fano	Denmark	55.2052	8.283		marine	shore	intertidal	0.5			VI	5	Karst et al., 2018
21	Futian mangrove swamp	China	22.5167	114.083		marine	mangrove sediment	intertidal	0.5			VI	1	Liang et al., 2007
22	Giber river	Denmark	56.065	10.1723		freshwater	lowland stream / river	river	0.5	5	low	I	2	Trojan et al., 2016
23	Guaymas basin		27.1244	-111.403		marine	hydrothermal vent	hydrothermal vent	2000			V	2	Teske et al., 2002
24	Gulf of Cadiz					marine	mud volcano	mud volcano						Maignien and Boon 2010
25	Gulf of Finland, Baltic Sea		59.5	25.51		brackish	sea basin	subtidal	84					Lyra et al., 2013
26	Gulf of Fos, Mediterranean Sea		43.375	4.83889		brackish	canal	intertidal	1					Pischedda et al., 2011
27	Gulf of Mexico (Geelhoed)		27.3505	-90.5629	35	marine	subtidal	subtidal	1500			VI	1	Geelhoed et al., 2023
28	Gulf of Mexico (Joye)		27.7233	-92.28	50	hypersaline	brine pool	brine pool	650					Joye et al., 2009
29	Gulf of Mexico (Martinez)		27.55	-92.5333		marine	mud volcano	subtidal	600			V	1	Martinez et al., 2006
30	Gulf of Mexico (Yang)		28.7231	-88.4096		marine	oil contaminated seafloor	subtidal	1560			VI	1	Yang et al., 2016
31	Gulf of Mexico, Green Canyon		27.56	-90.98		marine	cold seep	cold seep	950	2000	high	V	3	Orcutt et al., 2010
32	Gullfaks oil and gas fields, North Sea		61.17	2.24		marine	methane seep	cold seep	150			V	1	Wegener et al., 2008
33	Hakon Mosby mud volcano, Barents Sea		72.0042	14.725		marine	cold seep	cold seep	1250					Grünke et al., 2012
34	Hatsushima Island, Sagami bay	Japan	35.1764	139.267		marine	deep sea bay	subtidal						Konishi et al., 2016 (unpubl.)
35	Hikurangi margin, Wairarapa - Takahae		-41.779	175.427		marine	deep sea methane cold seep	cold seep	1056			V, VI	2	Ruff et al., 2013
36	Hou	Denmark	55.9102	10.2463		brackish	intertidal bay	intertidal	0.5			VI	3	Sereika et al., 2023
37	Hydrate Ridge, Oregon		44.6708	-125.105		marine	marine sediment above hydrate ridge	cold seep	780	20000	high	V	4	Knittel et al., 2003
38	Iceland	Iceland	64.7043	-14.3675	33	marine	subtidal	subtidal	30	100	medium			Vasquez-Cardenas et al., 2022
39	Isar river, Garching	Germany	48.2398	11.6648		freshwater	river	river	0.5	4	low	I	3	Sachs et al., 2022
40	Iwata River, Tsu City	Japan	34.7061	136.431		freshwater	river	river	0.5			I	1	Hosoda et al., 2010
41	Japan Sea		37.4333	138	34	marine	deep sea methane seep	cold seep	1000					Yanagawa et al., 2011
42	Juan de Fuca ridge		47.948	-129.099		marine	hydrothermal vent	hydrothermal vent	2180			V	3	Forget and Juniper 2011
43	Kairei field on Hakuho Knoll, Central Indian Ridge, Indian Ocean		-25.3195	70.0405		marine	Inactive sulfide chimney structures	hydrothermal vent						Suzuki et al., 2004
44	Lake Dongping	China	35.9751	116.209		freshwater	lake	lake	0.5			I	1	Song et al., 2012
45	Lake Grevelingen	The Netherlands	51.747	3.898	30	marine	marine lake	marine lake	32	300	medium	VI	1	Malkin et al., 2014
46	Lake Taihu	China	30.934	120.206		freshwater	shallow freshwater lake	lake	0.5					Huang et al., 2016
47	Limfjorden, Aalborg	Denmark	57.0594	9.89066		brackish	fjord	fjord	0.65			VI	3	Karst et al., 2018
48	Little Sippewissett salt marsh	USA	41.5759	-70.6359	25	brackish	salt marsh	intertidal	0.5	100	medium	VI	2	Larsen et al., 2015
49	Loegten strand	Denmark	56.2882	10.3813		brackish	intertidal sand	intertidal	0.5			II, VI	3	Sereika et al., 2023
50	Logatchev hydrothermal vent field, Anya's garden		14.75	-44.98		marine	hydrothermal vent field	hydrothermal vent	3038	250	medium	V	1	Schauer et al., 2011
51	Madum lake	Denmark	56.801	9.95075		freshwater	lake	lake	0.5			VI	1	Karst et al., 2018
52	Magazzolo river, Sicily (ME2)	Italy	37.4276	13.2509	2	brackish	river mouth	estuary	0.5	<5	low	II, III, VI	3	This study
53	Magazzolo river, Sicily (ME20)	Italy	37.4273	13.2492	20	brackish	river mouth	estuary	0.5	<5	low	II	1	This study
54	Magazzolo river, Sicily (ME3)	Italy	37.4287	13.2506	3	brackish	river mouth	estuary	0.5	<5	low	II, III	2	This study
55	Mariagerfjord	Denmark	56.6989	10.0449		brackish	estuary	fjord				VI	5	Karst et al., 2018
56	Mississippi Canyon Block 118, Gulf of Mexico		28.8578	-88.492		marine	hydrocarbon seep	subtidal	890			V, VI	2	Lloyd et al., 2010
57	Mokbaai	The Netherlands	53.0057	4.75947	35	marine	salt marsh	intertidal	1	>250	medium	VI	1	Geelhoed et al., 2023
58	Mud volcano, Mound 12		8.9306	-84.3119		marine	methane seep	subtidal	1020			IV, V	12	Thurber et al., 2011
59	Mungi Lake	USA	34.1017	-118.012		freshwater	lake	lake	0.5			I	1	Yang et al., 2023
60	Nankai Trough		33.65	137.933		marine	vent sites	hydrothermal vent	3843			V	1	Li et al., 1999
61	Niida River	Japan				marine	intertidal sediment from river	intertidal	0.5					Nakamura et al., 2005 (unpubl.)
62	Nile Deep Sea fan, Amon mud volcano center, Mediterranean Sea		32.3688	31.711		marine	cold seep	cold seep	1122					Grünke et al., 2011
63	Nile Deep Sea fan, Amon mud volcano flank, Mediterranean Sea		32.3677	31.7044		marine	cold seep	cold seep	1158					Grünke et al., 2011
64	Nile Deep Sea fan, pockmark area, Mediterranean Sea		32.5332	30.3355		marine	cold seep	cold seep	1698			VI	1	Grünke et al., 2011
65	Oosterschelde Bay, Zandkreek	The Netherlands	51.55	3.88333	29	brackish	bay	intertidal	0.15					Miyatake et al., 2014
66	Ostend harbour (BCZOH)	Belgium	51.2333	2.9261	35	marine	subtidal	subtidal	13.4	80	medium	VI	2	This study
67	Oude Bietenhaven, Eastern Scheldt	The Netherlands	51.4478	4.0965	30	marine	intertidal sand	intertidal	0.5			VI	1	Geelhoed et al., 2023
68	Rattekaai (RSM30)	The Netherlands	51.2621	4.1011	30	marine	intertidal salt marsh	intertidal	0.5	1000	high	VI	9	Malkin et al., 2014
69	Rodriguez Triple Junction in the Indian Ocean		-25.3205	70.0403		marine	Snail	hydrothermal vent	2440			V	3	Goffredi et al., 2004
70	Sagami Bay	Japan	35	139.217		marine	cold seep	cold seep	1174					Fang et al., 2006
71	Schiermonnikoog	The Netherlands	53.49	6.14		marine	coastal microbial mat	intertidal						Tomitani et al., 2013 (unpubl.)
72	Shahe river	China	28.3823	112.93		freshwater	river	river	0.5			I	1	An et al., 2018 (unpubl.)
73	Shimokita peninsula					marine	drilling core	other				V	1	Takami and Arai 2014 (unpubl.)
74	Smeerenburgfjorden, Svalbard	Norway	79.72	11.08		marine	Arctic marine sediment	fjord	210			V	3	Hubert et al., 2009
75	Sonora Margin cold seep Vasconcelos, Guaymas Basin		27.593	-111.483		marine	cold seep	cold seep	2000	10000	high	VI	1	Vigneron et al., 2014
76	St. 130, North Sea (BCZ130)	Belgium	51.2688	2.90317	30	marine	subtidal	subtidal	10			IV, V, VI	7	Malkin et al., 2014
77	St. 700, North Sea (BCZ700)	Belgium	51.3687	3.221	30	marine	subtidal	subtidal	10			IV	1	This study
78	Talbert salt marsh, Huntington Beach	USA	33.6335	-117.97		marine	salt marsh	intertidal	0.5			VI	1	Darjany et al., 2014
79	Tangyin hydrothermal field, Okinawa Trough		25.0736	122.592		marine	hydrothermal vent field	hydrothermal vent	1200			V	1	Wang et al., 2016
80	Tokyo Bay	Japan	35.5367	139.917		marine	bay	subtidal	20			VI	1	Trojan et al., 2016
81	Tui Malila vent field, Lau Basin		-22	-176.5		marine	inactive hydrotheral sulfide chimney	hydrothermal vent	1800			V	1	Sylvan et al., 2013
82	Ulvedybet, Limfjorden	Denmark	57.0813	9.639		brackish	fjord	fjord	0.25			VI	5	Karst et al., 2018
83	urban reservoirs and catchments, northwest Singapore Island	Singapore	1.41768	103.727		freshwater	catchment	catchment	0.5					Nshimyimana et al., 2016
84	Venice lagoon	Italy	45.2896	12.1777		brackish	lagoon	subtidal	0.5					Borin et al., 2009
85	Vennelystparken, Aarhus	Denmark	56.1648	10.2078		freshwater	freshwater pond	lake	0.5			I	1	Thorup et al., 2021
86	Volcano 1, South Tonga Arc		-21.1432	-175.759		marine	shallow hydrothermal vent	hydrothermal vent	115			V	2	Murdock et al., 2010
87	Volcano 19, South Tonga Arc		-24.8047	177.019		marine	submarine volcano	hydrothermal vent	992			V	1	Forget et al., 2010
88	Wadden Sea in Konigshafen	Germany	55.0289	8.4342		marine	tidal flat	intertidal	0.5					Lokmer et al., 2016
89	Wadi Gaza	Palestine	31.408	34.3551		brackish	irregularly flowing water stream	estuary	0.5					Abed et al., 2011
90	Wenyu river	China	40.083	116.502		freshwater	river	river	0.3	30	medium	I	5	Xu et al., 2021
91	Western Port, Victoria	Australia	-38.229	145.309		marine	mangrove	intertidal	0.5	7	low	VI	1	Geelhoed et al., 2023
92	Yarra river (YR17)	Australia	-37.8334	145.027		brackish	estuary	estuary	2			II, VI	4	Geelhoed et al., 2023
